# Supplementary material for: Population Genomic Analysis of 962 Whole Genome Sequences of Humans Reveals Natural Selection in Non-Coding Regions
Source: PLoS One. 2015 Mar 25;10(3):e0121644. doi: 10.1371/journal.pone.0121644 (PMC4373932; doi:10.1371/journal.pone.0121644)
Supplement: S1 Table — (XLS) [file pone.0121644.s002.xls]

## Sheet: n962_HGMD_Uniprot.GO131
chr	pos	ref	alt	nref	nalt	nrefalt	naltalt	HWE_p	snpid	gene	OMIM	disease	pmid	func_region
1	2338015	T	C	1856	68	64	2	0.333939	rs34154371	PEX10	NA	Zellweger syndrome	19127411	exonic;nonsynonymous
1	2343939	C	T	1875	49	49	0	1	null	PEX10	NA	Zellweger syndrome	21031596	exonic;nonsynonymous
1	5933335	C	T	1922	2	2	0	1	rs41280798	NPHP4	NA	Nephronophthisis 4	15776426	exonic;nonsynonymous
1	5935064	T	C	1920	4	4	0	1	rs187947581	NPHP4	NA	Nephronophthisis 4	17855640	exonic;nonsynonymous
1	5935096	C	T	1909	15	15	0	1	rs183885357	NPHP4	NA	Nephronophthisis 4	15776426	exonic;nonsynonymous
1	5940243	G	A	1887	37	37	0	1	rs17472401	NPHP4	NA	Nephronophthisis 4	12205563	exonic;nonsynonymous
1	8030994	G	A	1904	20	20	0	1	rs71653619	PARK7	NA	Parkinson disease, autosomal recessive	12891685	exonic;nonsynonymous
1	10384896	C	T	1923	1	1	0	1	rs121908162	KIF1B	NA	Neuroblastoma	18334619	exonic;nonsynonymous
1	11907430	T	G	1920	4	4	0	1	rs61757261	NPPA	NA	Atrial fibrillation	19646991	exonic;nonsynonymous
1	12061533	G	A	1915	9	9	0	1	rs41278630	MFN2	NA	Charcot-Marie-Tooth disease 2a	19889647	exonic;nonsynonymous
1	12064892	G	A	1915	9	9	0	1	rs138382758	MFN2	NA	Charcot-Marie-Tooth disease 2a	16762064	exonic;nonsynonymous
1	12069692	G	A	1917	7	7	0	1	rs142271930	MFN2	NA	Charcot-Marie-Tooth disease 2a	16762064	exonic;nonsynonymous
1	16376111	A	G	1922	2	2	0	1	null	CLCNKB	NA	Bartter syndrome 3	10906158	splicing
1	16382201	G	A	1907	17	17	0	1	rs143663847	CLCNKB	NA	Bartter syndrome 3	21415153	exonic;synonymous
1	16458722	C	T	1923	1	1	0	1	rs116506614	EPHA2	NA	Cataracts	19649315	exonic;nonsynonymous
1	17355075	A	T	1921	3	3	0	1	rs190139590	SDHB	NA	Phaeochromocytoma and paraganglioma	18419787	intronic
1	20971158	A	T	1922	2	2	0	1	rs139226733	PINK1	NA	Parkinson disease, early-onset	15970950	exonic;nonsynonymous
1	20972108	G	A	1923	1	1	0	1	rs55831733	PINK1	NA	Parkinson disease, early-onset	15596610	exonic;nonsynonymous
1	20975105	G	A	1922	2	2	0	1	rs45478900	PINK1	NA	Parkinson disease, autosomal recessive	16969854	exonic;nonsynonymous
1	22163402	G	A	1823	101	95	3	0.742267	null	HSPG2	NA	Dyssegmental dysplasia, Silverman-Handmaker type	11279527	exonic;synonymous
1	22202483	G	A	1904	20	20	0	1	rs62642528	HSPG2	NA	Schwartz-Jampel syndrome type 1	16927315	exonic;nonsynonymous
1	24194748	G	C	1716	208	186	11	1	rs2070956	FUCA1	NA	Fucosidosis	9039984	exonic;nonsynonymous
1	25870254	G	A	1912	12	12	0	1	rs121908324	LDLRAP1	NA	Hypercholesterolaemia, autosomal recessive	11326085	exonic;stopgain
1	35227362	C	G	1845	79	73	3	0.212532	rs79193415	GJB4	NA	Deafness	17259707	exonic;nonsynonymous
1	35250457	C	T	1868	56	52	2	0.189166	rs1805063	GJB3	NA	Deafness, non-syndromic, autosomal recessive	10757647	exonic;nonsynonymous
1	40557070	T	A	1923	1	1	0	1	rs137852695	PPT1	NA	Neuronal ceroid lipofuscinosis, infantile	7637805	exonic;splicing;nonsynonymous
1	40557075	C	T	1921	3	3	0	1	null	PPT1	NA	Neuronal ceroid lipofuscinosis, infantile	21990111	intronic
1	43424304	C	T	1916	8	8	0	1	rs80359841	SLC2A1	NA	Glucose transporter 1 deficiency syndrome	10980529	splicing
1	43804305	G	C	1923	1	1	0	1	rs28928907	MPL	NA	Amegakaryocytic thrombocytopaenia, congenital	10971406	exonic;nonsynonymous
1	45407225	T	G	1923	1	1	0	1	rs113994023	EIF2B3	NA	Leukoencephalopathy with vanishing white matter	15136673	exonic;nonsynonymous
1	45480232	T	A	1913	11	11	0	1	L253Q	DCUP_HUMAN	Yes	(in familial porphyria cutanea tarda [dominant?]; decrease of activity; dbSNP:rs36033115).	NA	exonic;nonsynonymous
1	45481018	G	A	1923	1	1	0	1	G318R	DCUP_HUMAN	Yes	(in familial porphyria cutanea tarda [dominant?]).	NA	exonic;nonsynonymous
1	45797139	G	A	1918	6	6	0	1	rs150792276	MUTYH	NA	Adenomatous polyposis coli	16134147	exonic;nonsynonymous
1	45798151	C	T	1923	1	1	0	1	null	MUTYH	NA	Colorectal cancer	14991577	exonic;nonsynonymous
1	45973996	A	G	1923	1	1	0	1	null	MMACHC	NA	Methylmalonic aciduria & homocystinuria, cblC type	19370762	exonic;nonsynonymous
1	45974478	G	C	1923	1	1	0	1	rs140522266	MMACHC	NA	Methylmalonic aciduria	16311595	exonic;nonsynonymous
1	46655645	C	T	1890	34	32	1	0.256779	rs74374973	POMGNT1	NA	Muscular dystrophy, limb girdle	17878207	exonic;nonsynonymous
1	46871409	G	A	1919	5	5	0	1	rs114795065	FAAH	NA	Obesity	21118518	exonic;nonsynonymous
1	53668099	C	T	1920	4	4	0	1	rs74315294	CPT2	NA	Carnitine palmitoyltransferase 2 deficiency	8358442	exonic;nonsynonymous
1	55505180	C	A	1922	2	2	0	1	null	PCSK9	NA	Hypercholesterolaemia, autosomal dominant	18559913	UTR5
1	67635211	G	A	1922	2	2	0	1	rs76575803	IL23R	NA	Crohn's disease, protection against	21151126	exonic;nonsynonymous
1	67648596	G	A	1913	11	11	0	1	rs76418789	IL23R	NA	Crohn's disease, protection against	21151126	exonic;nonsynonymous
1	67705900	G	A	1889	35	35	0	1	rs41313262	IL23R	NA	Crohn's disease, protection against	21151126	exonic;nonsynonymous
1	70881670	C	T	1902	22	22	0	1	rs28941785	CTH	NA	Cystathioninuria	12574942	exonic;nonsynonymous
1	76198337	G	A	1920	4	4	0	1	rs147559466	ACADM	NA	Medium chain acyl CoA dehydrogenase deficiency	15171998	exonic;nonsynonymous
1	76215194	G	A	1923	1	1	0	1	G267R	ACADM_HUMAN	Yes	(in medium-chain acyl-CoA dehydrogenase deficiency [recessive?]).	NA	exonic;nonsynonymous
1	76226846	A	G	1910	14	14	0	1	K329E	ACADM_HUMAN	Yes	(in medium-chain acyl-CoA dehydrogenase deficiency [recessive?]; most common variant).	NA	exonic;nonsynonymous
1	92163646	G	A	1914	10	10	0	1	rs35352606	TGFBR3	NA	Premature ovarian failure	16613887	exonic;splicing;nonsynonymous
1	93297677	G	C	1916	8	8	0	1	null	RPL5	NA	Diamond-Blackfan anaemia	19773262	intronic
1	94467548	C	G	1914	10	10	0	1	V2050L	ABCA4_HUMAN	Yes	(in Stargardt disease type 1 [recessive?]).	NA	exonic;splicing;nonsynonymous
1	94473287	G	A	1916	8	8	0	1	L1970F	ABCA4_HUMAN	Yes	(in age-related macular degeneration type 2 and fundus flavimaculatus [recessive?]; dbSNP:rs1800554).	NA	exonic;nonsynonymous
1	94473807	C	T	1915	9	9	0	1	G1961E	ABCA4_HUMAN	Yes	(in Stargardt disease type 1 [recessive?] and fundus flavimaculatus [recessive?]; frequent mutation; may be associated with age-related macular degeneration type 2; inhibition of ATP hydrolysis by retinal; dbSNP:rs1800553).	NA	exonic;nonsynonymous
1	94476377	C	T	1915	9	9	0	1	R1898H	ABCA4_HUMAN	Yes	(in Stargardt disease type 1 [recessive?] and age-related macular degeneration type 2; dbSNP:rs1800552).	NA	exonic;nonsynonymous
1	94476951	A	G	1923	1	1	0	1	rs1800728	ABCA4	NA	Cone-rod dystrophy with extensive atrophy	15614537	intronic
1	94480221	G	C	1923	1	1	0	1	P1780A	ABCA4_HUMAN	Yes	(in Stargardt disease type 1 [recessive?]).	NA	exonic;nonsynonymous
1	94502756	G	A	1923	1	1	0	1	rs61752424	ABCA4	NA	Fundus flavimaculatus	11385708	exonic;nonsynonymous
1	94502760	C	A	1923	1	1	0	1	rs61752423	ABCA4	NA	Stargardt disease	9781034	exonic;stopgain
1	94508353	G	A	1923	1	1	0	1	null	ABCA4	NA	Stargardt disease	10958763	exonic;nonsynonymous
1	94508969	G	A	1920	4	4	0	1	A1038V	ABCA4_HUMAN	Yes	(in Stargardt disease type 1 [recessive?]; fundus flavimaculatus [recessive?] and cone-rod dystrophy type 3; frequent mutation; reduced ATP-binding and retinal-stimulated ATP hydrolysis).	NA	exonic;nonsynonymous
1	94509026	G	A	1923	1	1	0	1	T1019M	ABCA4_HUMAN	Yes	(in Stargardt disease type 1 [recessive?]).	NA	exonic;nonsynonymous
1	94510164	C	T	1923	1	1	0	1	rs61751262	ABCA4	NA	Stargardt disease	10958763	intronic
1	94514466	T	C	1916	8	8	0	1	rs139655975	ABCA4	NA	Macular degeneration, age related	10958763	exonic;nonsynonymous
1	94517254	C	G	1910	14	14	0	1	G863A	ABCA4_HUMAN	Yes	(in Stargardt disease type 1 [recessive?]; fundus flavimaculatus [recessive?] and cone-rod dystrophy type 3; frequent mutation in northern Europe in linkage disequilibrium with the polymorphic variant Q-943; reduced ATP-binding capacity and retinal-stimulated ATP hydrolysis).	NA	exonic;splicing;nonsynonymous
1	94526212	G	A	1923	1	1	0	1	rs61749423	ABCA4	NA	Stargardt disease	10090887	exonic;stopgain
1	94528142	A	C	1920	4	4	0	1	rs114572202	ABCA4	NA	Stargardt disease	17982420	exonic;nonsynonymous
1	94528774	C	T	1917	7	7	0	1	rs145525174	ABCA4	NA	Macular dystrophy, concentric annular	18024811	exonic;nonsynonymous
1	94543389	C	T	1921	3	3	0	1	E471K	ABCA4_HUMAN	Yes	(in age-related macular degeneration type 2 and Stargardt disease type 1 [recessive?]; ATP-binding capacity and retinal stimulation as in wild-type; dbSNP:rs1800548).	NA	exonic;nonsynonymous
1	94568627	C	T	1921	3	3	0	1	rs61748532	ABCA4	NA	Stargardt disease	14517951	exonic;nonsynonymous
1	94568675	T	C	1920	4	4	0	1	I156V	ABCA4_HUMAN	Yes	(in Stargardt disease type 1 [recessive?]).	NA	exonic;nonsynonymous
1	94568686	C	T	1915	9	9	0	1	rs80309162	ABCA4	NA	Stargardt disease	11385708	exonic;nonsynonymous
1	97547947	T	A	1913	11	11	0	1	rs67376798	DPYD	NA	Dihydropyrimidine dehydrogenase deficiency	11156223	exonic;nonsynonymous
1	97915614	C	T	1913	11	11	0	1	rs3918290	DPYD	NA	Dihydropyrimidine dehydrogenase deficiency	8892022	splicing
1	98144726	T	C	1909	15	15	0	1	rs45589337	DPYD	NA	Dihydropyrimidine dehydrogenase deficiency	14635116	exonic;nonsynonymous
1	98164955	T	C	1923	1	1	0	1	rs72549307	DPYD	NA	Dihydropyrimidine dehydrogenase deficiency	11988088	exonic;nonsynonymous
1	98206012	G	A	1923	1	1	0	1	null	DPYD	NA	Dihydropyrimidine dehydrogenase deficiency	11783493	exonic;nonsynonymous
1	103428312	G	T	1919	5	5	0	1	rs78046647	COL11A1	NA	Osteoarthritis, early-onset	15922184	exonic;nonsynonymous
1	115221116	C	A	1917	7	7	0	1	rs61752478	AMPD1	NA	Adenosine monophosphate deaminase deficiency	15173240	exonic;nonsynonymous
1	115226899	C	A	1922	2	2	0	1	rs139582106	AMPD1	NA	Adenosine monophosphate deaminase deficiency	12117480	exonic;nonsynonymous
1	116269619	T	C	1923	1	1	0	1	rs28730716	CASQ2	NA	Cardiomyopathy, non-compaction, left ventricular	20530761	exonic;nonsynonymous
1	116275561	G	C	1923	1	1	0	1	rs146664754	CASQ2	NA	Ventricular tachycardia, polymorphic	18543230	exonic;nonsynonymous
1	119962142	G	A	1923	1	1	0	1	A82T	3BHS2_HUMAN	Yes	(in adrenal hyperplasia type 2 [recessive?]).	NA	exonic;nonsynonymous
1	147231061	C	A	1923	1	1	0	1	rs121434557	GJA5	NA	Atrial fibrillation	16790700	exonic;nonsynonymous
1	150526393	G	A	1923	1	1	0	1	rs76075180	ADAMTSL4	NA	Ectopia lentis, isolated form	20564469	exonic;nonsynonymous
1	152277622	G	T	1916	8	8	0	1	rs150597413	FLG	NA	Ichthyosis vulgaris	17417636	exonic;stopgain
1	152280023	G	A	1913	11	11	0	1	rs138726443	FLG	NA	Ichthyosis vulgaris	17417636	exonic;stopgain
1	152285861	G	A	1894	30	28	1	0.205165	rs61816761	FLG	NA	Ichthyosis vulgaris	16444271	exonic;stopgain
1	154548331	T	C	1923	1	1	0	1	rs79137415	CHRNB2	NA	Epilepsy, idiopathic	21703448	exonic;nonsynonymous
1	155205008	C	G	1923	1	1	0	1	rs368060	GBA	NA	Gaucher disease	2349952	exonic;nonsynonymous
1	155205634	T	C	1915	9	9	0	1	rs76763715	GBA	NA	Gaucher disease 1	3353383	exonic;splicing;nonsynonymous
1	155206037	G	A	1916	8	8	0	1	rs75548401	GBA	NA	Gaucher disease	8774051	exonic;splicing;nonsynonymous
1	155207249	A	C	1923	1	1	0	1	null	GBA	NA	Gaucher disease 2	10649495	exonic;nonsynonymous
1	155260382	C	T	1920	4	4	0	1	R569Q	KPYR_HUMAN	Yes	(in pyruvate kinase deficiency of red cells).	NA	exonic;nonsynonymous
1	155261649	C	T	1917	7	7	0	1	rs8177988	PKLR	NA	Pyruvate kinase deficiency	10702808	exonic;nonsynonymous
1	155261709	G	A	1917	7	7	0	1	R486W	KPYR_HUMAN	Yes	(in pyruvate kinase deficiency of red cells; frequent mutation; no conformational change).	NA	exonic;nonsynonymous
1	155265228	C	T	1919	5	5	0	1	null	PKLR	NA	Pyruvate kinase deficiency	15953013	exonic;splicing;synonymous
1	155265446	C	A	1880	44	44	0	1	rs8177971	PKLR	NA	Pyruvate kinase deficiency	16704447	intronic
1	156100408	C	T	1921	3	3	0	1	rs41313880	LMNA	NA	Muscular dystrophy, Emery-Dreifuss	20848652	exonic;splicing;synonymous
1	156106982	G	A	1923	1	1	0	1	null	LMNA	NA	Cardiomyopathy, dilated	19318026	exonic;nonsynonymous
1	156108298	C	T	1923	1	1	0	1	S573L	LMNA_HUMAN	Yes	(in cardiomyopathy dilated type 1A; familial partial lipodystrophy type 2 and mandibuloacral dysplasia with type A lipodystrophy).	NA	exonic;nonsynonymous
1	156108510	C	T	1917	7	7	0	1	rs142000963	lmna1	NA	Cardiomyopathy, dilated	11180602	exonic;nonsynonymous
1	156848918	C	T	1817	107	103	2	0.76275	rs6336	NTRK1	NA	Pain insensitivity, congenital	10330344	exonic;nonsynonymous
1	156848946	G	T	1821	103	99	2	1	rs6339	NTRK1	NA	Pain insensitivity, congenital	10330344	exonic;nonsynonymous
1	158613314	G	A	1910	14	14	0	1	null	SPTA1	NA	Spherocytosis	8941647	intronic
1	158655062	G	A	1922	2	2	0	1	R34W	SPTA1_HUMAN	Yes	(in elliptocytosis type 2 [dominant?]; Genova).	NA	exonic;nonsynonymous
1	160012270	C	T	1893	31	31	0	1	rs115466046	KCNJ10	NA	Autism, seizures & intellectual disability	21458570	exonic;nonsynonymous
1	161137862	G	A	1923	1	1	0	1	null	PPOX	NA	Porphyria, variegate	NA	exonic;nonsynonymous
1	161180389	T	C	1923	1	1	0	1	rs150667550	NDUFS2	NA	Isolated Complex I deficiency	NA	exonic;nonsynonymous
1	161180482	G	A	1917	7	7	0	1	rs35086265	NDUFS2	NA	Isolated Complex I deficiency	22200994	exonic;nonsynonymous
1	169446512	T	A	1923	1	1	0	1	null	SLC19A2	NA	Megaloblastic anaemia, thiamine responsive	19643445	exonic;nonsynonymous
1	169497306	G	A	1923	1	1	0	1	rs141977229	F5	NA	Factor V deficiency	19486170	exonic;nonsynonymous
1	171076952	C	T	1920	4	4	0	1	rs72549326	FMO3	NA	Trimethylaminuria	9398858	exonic;nonsynonymous
1	171083232	G	T	1920	4	4	0	1	rs61753344	FMO3	NA	Trimethylaminuria	9536088	exonic;stopgain
1	171605478	G	A	1922	2	2	0	1	rs74315329	MYOC	NA	Glaucoma 1, open angle	9005853	exonic;stopgain
1	171605702	G	T	1922	2	2	0	1	T293K	MYOC_HUMAN	Yes	(in primary open angle glaucoma type 1A).	NA	exonic;nonsynonymous
1	173806156	C	A	1923	1	1	0	1	Q248K	SYDM_HUMAN	Yes	(in leukoencephalopathy with brainstem and spinal cord involvement and lactate elevation [recessive?]).	NA	exonic;nonsynonymous
1	173873176	C	A	1920	4	4	0	1	A416S	ANT3_HUMAN	Yes	(in antithrombin III deficiency; type-II; Cambridge-2).	NA	exonic;nonsynonymous
1	173883881	G	A	1923	1	1	0	1	P73L	ANT3_HUMAN	Yes	(in antithrombin III deficiency; type-II; Basel/ Franconville/Clichy-1/Clichy-2/Dublin-2; lacks heparin-binding ability).	NA	exonic;nonsynonymous
1	179544941	G	A	1918	6	6	0	1	P20L	PODO_HUMAN	Yes	(in autosomal recessive steroid-resistant nephrotic syndrome [recessive?]).	NA	exonic;nonsynonymous
1	182555149	C	A	1915	9	9	0	1	null	RNASEL	NA	Ribonuclease L deficiency	11799394	exonic;stopgain
1	183532364	T	A	1908	16	16	0	1	rs35012521	NCF2	NA	Chronic granulomatous disease	16937026	exonic;nonsynonymous
1	192778206	A	G	1922	2	2	0	1	rs141030117	RGS2	NA	Hypertension	16003176	exonic;nonsynonymous
1	192778214	A	G	1923	1	1	0	1	rs193051407	RGS2	NA	Hypertension	16003176	exonic;nonsynonymous
1	196620941	C	T	1902	22	18	2	0.00563214	rs74842824	CFH	NA	Haemolytic uraemic syndrome, atypical	20106822	upstream
1	196684751	T	A	1922	2	2	0	1	rs147403664	CFH	NA	Thrombotic microangiopathy following transplantation	18557729	exonic;nonsynonymous
1	196694379	G	A	1923	1	1	0	1	rs148165372	CFH	NA	Haemolytic uraemic syndrome, atypical	20513133	exonic;nonsynonymous
1	196709816	G	T	1919	5	5	0	1	rs149474608	CFH	NA	Haemolytic uraemic syndrome	14583443	exonic;nonsynonymous
1	196709833	C	T	1919	5	5	0	1	T956M	CFAH_HUMAN	Yes	(in hemolytic uremic syndrome atypical type 1).	NA	exonic;nonsynonymous
1	196967422	G	C	1922	2	2	0	1	rs111327589	CFHR5	NA	Haemolytic uraemic syndrome, atypical	20513133	exonic;nonsynonymous
1	197060021	T	A	1923	1	1	0	1	null	ASPM	NA	Primary microcephaly	19353628	exonic;stopgain
1	197297616	C	G	1923	1	1	0	1	rs145141811	CRB1	NA	Retinitis pigmentosa	20591486	exonic;nonsynonymous
1	197297965	G	A	1920	4	4	0	1	V162M	CRUM1_HUMAN	Yes	(in pigmented paravenous chorioretinal atrophy [dominant?]).	NA	exonic;nonsynonymous
1	197298095	T	C	1923	1	1	0	1	rs140922749	CRB1	NA	Retinitis pigmentosa	12843338	exonic;nonsynonymous
1	197398616	G	A	1923	1	1	0	1	rs114052315	CRB1	NA	Leber congenital amaurosis	16123401	exonic;nonsynonymous
1	197411409	G	A	1923	1	1	0	1	rs62636285	CRB1	NA	Leber congenital amaurosis	11231775	exonic;nonsynonymous
1	201020165	T	A	1919	5	5	0	1	rs145910245	CACNA1S	NA	Malignant hyperthermia	20861472	exonic;nonsynonymous
1	201328373	G	A	1921	3	3	0	1	rs121964857	TNNT2	NA	Cardiomyopathy, hypertrophic	7898523	exonic;nonsynonymous
1	201334755	C	T	1923	1	1	0	1	null	TNNT2	NA	Cardiomyopathy, hypertrophic	NA	exonic;nonsynonymous
1	203194834	C	T	1911	13	13	0	1	rs137852607	CHIT1	NA	Chitotriosidase deficiency	17464953	exonic;nonsynonymous
1	204131140	C	T	1922	2	2	0	1	null	REN	NA	Renal tubular dysgenesis	22095942	splicing
1	204159680	A	G	1923	1	1	0	1	null	KISS1	NA	Hypogonadotropic hypogonadism, normosmic idiopathic	21880801	exonic;nonsynonymous
1	207934761	G	A	1923	1	1	0	1	null	CD46	NA	Membranoproliferative glomerulonephritis	17018561	exonic;nonsynonymous
1	207958446	C	T	1892	32	32	0	1	rs35366573	CD46	NA	Haemolytic uraemic syndrome	16621965	exonic;nonsynonymous
1	209880259	T	G	1530	394	308	43	0.620385	null	HSD11B1	NA	Cortisone reductase deficiency	12858176	intronic
1	215844373	C	T	1908	16	16	0	1	rs45549044	USH2A	NA	Usher syndrome 2A	19129697	exonic;nonsynonymous
1	215963510	C	T	1922	2	2	0	1	rs148660051	USH2A	NA	Retinitis pigmentosa, autosomal recessive	20507924	exonic;nonsynonymous
1	216052307	A	G	1922	2	2	0	1	rs111033262	USH2A	NA	Usher syndrome 2	20507924	exonic;nonsynonymous
1	216370040	G	A	1922	2	2	0	1	null	USH2A	NA	Usher syndrome 2a	16963483	exonic;nonsynonymous
1	216420460	C	A	1921	3	3	0	1	C759F	USH2A_HUMAN	Yes	(in retinitis pigmentosa type 39 [recessive?] and Usher syndrome type 2A).	NA	exonic;nonsynonymous
1	216465694	G	C	1920	4	4	0	1	L555V	USH2A_HUMAN	Yes	(in Usher syndrome type 2A; dbSNP:rs35818432).	NA	exonic;nonsynonymous
1	216538391	C	T	1883	41	41	0	1	rs45500891	USH2A	NA	Usher syndrome 2a	10909849	exonic;nonsynonymous
1	227071475	C	T	1914	10	10	0	1	rs140501902	PSEN2	NA	Alzheimer disease	18667258	exonic;nonsynonymous
1	227170648	C	T	1887	37	35	1	0.297331	rs41303129	ADCK3	NA	Ubiquinone deficiency with cerebellar ataxia	18319074	exonic;synonymous
1	227173027	G	A	1923	1	1	0	1	rs119468009	ADCK3	NA	Ubiquinone deficiency with cerebellar ataxia	18319074	exonic;nonsynonymous
1	228346015	G	T	1922	2	2	0	1	null	GJC2	NA	Secondary lymphoedema	22351697	exonic;nonsynonymous
1	228503566	G	A	1919	5	5	0	1	rs79023478	OBSCN	NA	Cardiomyopathy, hypertrophic	17716621	exonic;nonsynonymous
1	230386238	A	C	1911	13	13	0	1	null	GALNT2	NA	Improved plasma triglyceride clearance	22152306	exonic;nonsynonymous
1	230845755	T	C	1921	3	3	0	1	rs56073403	AGT	NA	Hypertension	7607642	exonic;nonsynonymous
1	236911044	C	T	1923	1	1	0	1	null	ACTN2	NA	Cardiomyopathy, hypertrophic	20022194	exonic;nonsynonymous
1	237730059	C	T	1911	13	11	1	0.0399846	rs72549415	RYR2	NA	Catecholaminergic polymorphic ventricular tachycardia	19597050	exonic;nonsynonymous
1	242042364	A	G	1919	5	5	0	1	rs12122770	EXO1	NA	Colorectal cancer, non-polyposis	11375940	exonic;nonsynonymous
1	242048615	G	C	1919	5	5	0	1	rs4150000	EXO1	NA	Colorectal cancer, non-polyposis	11375940	splicing
1	242048680	G	A	1917	7	7	0	1	rs4150001	EXO1	NA	Colorectal cancer, non-polyposis	11375940	exonic;nonsynonymous
1	247587343	G	A	1908	16	16	0	1	rs121908147	NLRP3	NA	Familial cold autoinflammatory syndrome	11687797	exonic;nonsynonymous
1	247587771	C	T	1897	27	27	0	1	rs41311573	NLRP3	NA	Recurrent fever and amyloidosis	NA	exonic;synonymous
1	247588214	G	A	1922	2	2	0	1	rs145268073	NLRP3	NA	Familial cold autoinflammatory syndrome	15593220	exonic;nonsynonymous
2	1481335	G	A	1923	1	1	0	1	V433M	PERT_HUMAN	Yes	(in congenital hypothyroidism due to dyshormonogenesis type 2A).	NA	exonic;nonsynonymous
2	1497798	C	T	1923	1	1	0	1	R665W	PERT_HUMAN	Yes	(in congenital hypothyroidism due to dyshormonogenesis type 2A; fails to localize to the plasma membrane).	NA	exonic;nonsynonymous
2	21224843	G	A	1918	6	6	0	1	rs12713450	APOB	NA	Hypertriglyceridaemia	20657596	exonic;nonsynonymous
2	21225113	A	G	1923	1	1	0	1	rs12720843	APOB	NA	Hypercholesterolaemia	16250003	exonic;nonsynonymous
2	21228437	A	G	1923	1	1	0	1	null	APOB	NA	Hypertriglyceridaemia	20657596	exonic;nonsynonymous
2	21229220	C	G	1923	1	1	0	1	null	APOB	NA	Apolipoprotein B deficiency	7882518	exonic;nonsynonymous
2	21229905	T	C	1915	9	9	0	1	rs12720854	APOB	NA	Hypertriglyceridaemia	20657596	exonic;nonsynonymous
2	21231524	G	A	1490	434	330	52	0.579851	rs676210	APOB	NA	Hypocholesterolaemia	9490296	exonic;nonsynonymous
2	21238367	C	T	1910	14	14	0	1	rs12713843	APOB	NA	Hypobetalipoproteinaemia	14732481	exonic;nonsynonymous
2	21249840	A	T	1920	4	4	0	1	rs41291161	APOB	NA	Hypobetalipoproteinaemia	17570373	intronic
2	25384048	G	C	1918	6	6	0	1	rs28932472	POMC	NA	Obesity	11244459	exonic;nonsynonymous
2	26418053	C	G	1921	3	3	0	1	E510Q	ECHA_HUMAN	Yes	(in maternal acute fatty liver of pregnancy and long-chain 3-hydroxyl- CoA dehydrogenase deficiency; loss of activity).	NA	exonic;nonsynonymous
2	26700099	G	A	1883	41	41	0	1	R822W	OTOF_HUMAN	Yes	(in deafness autosomal recessive type 9 [recessive?]; uncertain pathogenicity).	NA	exonic;nonsynonymous
2	26700309	C	T	1916	8	8	0	1	R794H	OTOF_HUMAN	Yes	(in deafness autosomal recessive type 9 [recessive?]).	NA	exonic;nonsynonymous
2	27315225	G	A	1923	1	1	0	1	G40R	KHK_HUMAN	Yes	(in fructosuria).	NA	exonic;nonsynonymous
2	27730551	C	A	1923	1	1	0	1	null	GCKR	NA	Hypertriglyceridaemia	22182842	exonic;nonsynonymous
2	27745372	C	T	1917	7	7	0	1	rs146053779	GCKR	NA	Hypertriglyceridaemia	20657596	exonic;stopgain
2	32289031	C	T	1906	18	18	0	1	rs121908515	SPAST	NA	Spastic paraplegia, autosomal dominant	11015453	exonic;nonsynonymous
2	32312629	G	A	1922	2	2	0	1	rs141944844	SPAST	NA	Spastic paraplegia	20562464	exonic;nonsynonymous
2	32379449	A	C	1919	5	5	0	1	rs144594804	SPAST	NA	Upper motor neuron syndrome, adult onset	16240363	exonic;nonsynonymous
2	38298338	C	T	1923	1	1	0	1	rs55989760	CYP1B1	NA	Glaucoma, primary congenital	9497261	exonic;nonsynonymous
2	38298394	C	T	1921	3	3	0	1	rs79204362	CYP1B1	NA	Glaucoma, primary congenital	10655546	exonic;nonsynonymous
2	38301847	C	T	1911	13	13	0	1	rs57865060	CYP1B1	NA	Glaucoma, primary congenital	11558822	exonic;nonsynonymous
2	38302291	A	T	1905	19	19	0	1	rs9282671	CYP1B1	NA	Glaucoma, primary open angle	15342693	exonic;nonsynonymous
2	38302377	G	A	1923	1	1	0	1	null	CYP1B1	NA	Hepatocellular adenoma, increased risk with mutated TCF1	17363580	exonic;nonsynonymous
2	44071644	A	G	1923	1	1	0	1	null	ABCG8	NA	Sitosterolaemia	11452359	splicing
2	44099233	G	A	1922	2	2	0	1	rs137852987	ABCG8	NA	Sitosterolaemia	11099417	exonic;stopgain
2	44100948	C	T	1923	1	1	0	1	rs137852991	ABCG8	NA	Sitosterolaemia	11099417	exonic;stopgain
2	44502915	C	T	1922	2	2	0	1	rs149813423	SLC3A1	NA	Cystinuria	20135149	exonic;nonsynonymous
2	44507990	C	T	1914	10	10	0	1	rs140317484	SLC3A1	NA	Cystinuria	15635077	exonic;nonsynonymous
2	44508562	C	T	1923	1	1	0	1	T216M	SLC31_HUMAN	Yes	(in cystinuria type 1).	NA	exonic;nonsynonymous
2	44513202	T	C	1916	8	8	0	1	rs141587158	SLC3A1	NA	Cystinuria	NA	exonic;nonsynonymous
2	44528165	G	A	1915	9	9	0	1	rs78795495	SLC3A1	NA	Cystinuria	15635077	exonic;synonymous
2	44539773	T	C	1921	3	3	0	1	Y461H	SLC31_HUMAN	Yes	(in cystinuria type 1).	NA	exonic;nonsynonymous
2	44539792	T	C	1919	5	5	0	1	M467T	SLC31_HUMAN	Yes	(in cystinuria type 1; loss of 80% of amino acid transport activity).	NA	exonic;nonsynonymous
2	45169449	G	A	1918	6	6	0	1	G69D	SIX3_HUMAN	Yes	(in holoprosencephaly type 2).	NA	exonic;nonsynonymous
2	45171847	C	T	1923	1	1	0	1	null	SIX3	NA	Holoprosencephaly	17001667	exonic;nonsynonymous
2	45233463	G	A	1921	3	3	0	1	rs147806994	SIX2	NA	Renal hypodysplasia	18305125	exonic;nonsynonymous
2	47637301	T	G	1922	2	2	0	1	I145M	MSH2_HUMAN	Yes	(in hereditary non-polyposis colorectal cancer type 1 [dominant?]).	NA	exonic;nonsynonymous
2	48026648	T	C	1923	1	1	0	1	rs63751005	MSH6	NA	Colorectal cancer, non-polyposis	16237223	exonic;nonsynonymous
2	48027755	T	C	1907	17	17	0	1	V878A	MSH6_HUMAN	Yes	(in suspected hereditary non-polyposis colorectal cancer type 5 [dominant?]; colorectal/ endometrial cancer and CRC; dbSNP:rs2020912).	NA	exonic;nonsynonymous
2	71058878	A	G	1916	8	8	0	1	null	CD207	NA	Birbeck granules deficiency	15816828	exonic;nonsynonymous
2	71337204	G	A	1917	7	7	0	1	rs138436961	MCEE	NA	Methylmalonic aciduria	17823972	exonic;nonsynonymous
2	71738977	G	A	1913	11	11	0	1	rs34997054	DYSF	NA	Muscular dystrophy, limb girdle / Miyoshi myopathy	21522182	exonic;nonsynonymous
2	71740897	C	A	1896	28	28	0	1	A170E	DYSF_HUMAN	Yes	(in Miyoshi myopathy [recessive?]; limb-girdle muscular dystrophy type 2B [recessive?] and isolated hyperCKemia; dbSNP:rs34999029).	NA	exonic;nonsynonymous
2	71762413	G	A	1881	43	43	0	1	rs61740288	DYSF	NA	Miyoshi myopathy	17698709	exonic;nonsynonymous
2	71797818	C	T	1923	1	1	0	1	R1041C	DYSF_HUMAN	Yes	(in Miyoshi myopathy [recessive?]).	NA	exonic;nonsynonymous
2	71829924	A	G	1905	19	19	0	1	I1298V	DYSF_HUMAN	Yes	(in Miyoshi myopathy [recessive?] and limb-girdle muscular dystrophy type 2B [recessive?]).	NA	exonic;nonsynonymous
2	74177777	A	G	1887	37	35	1	0.297331	rs74874677	DGUOK	NA	Mitochondrial DNA depletion syndrome	16908739	exonic;nonsynonymous
2	74588717	G	A	1915	9	9	0	1	rs72466496	DCTN1	NA	Amyotrophic lateral sclerosis	15326253	exonic;nonsynonymous
2	74759825	G	A	1918	6	6	0	1	G399S	HTRA2_HUMAN	Yes	(in Parkinson disease type 13; reduced protease activity).	NA	exonic;nonsynonymous
2	99012411	G	A	1923	1	1	0	1	null	CNGA3	NA	Colour-blindness, total	11536077	exonic;nonsynonymous
2	110920625	C	T	1923	1	1	0	1	rs121907899	NPHP1	NA	Nephronophthisis 1 with COMA	10839884	exonic;splicing;nonsynonymous
2	113820124	C	T	1918	6	6	0	1	rs144478519	IL36RN	NA	Psoriasis, generalised pustular	21839423	exonic;nonsynonymous
2	121747822	G	A	1923	1	1	0	1	M1444I	GLI2_HUMAN	Yes	(in holoprosencephaly type 9).	NA	exonic;nonsynonymous
2	128047041	T	C	1923	1	1	0	1	null	ERCC3	NA	Lung cancer, susceptibility to	16550608	exonic;nonsynonymous
2	128178842	C	T	1922	2	2	0	1	rs138057813	PROC	NA	Protein C deficiency	7482420	intronic
2	128179014	G	A	1923	1	1	0	1	V76M	PROC_HUMAN	Yes	(in protein C deficiency autosomal dominant [dominant?]; Vermont-1).	NA	exonic;nonsynonymous
2	128180618	C	T	1923	1	1	0	1	null	PROC	NA	Protein C deficiency	7981702	exonic;stopgain
2	128180867	T	C	1923	1	1	0	1	null	PROC	NA	Protein C deficiency	17152060	exonic;nonsynonymous
2	128186370	G	A	1923	1	1	0	1	rs139741458	PROC	NA	Protein C deficiency	7951255	exonic;nonsynonymous
2	148696810	G	A	1916	8	8	0	1	null	ORC4	NA	Lymphoproliferative disorder	20010161	exonic;nonsynonymous
2	152369326	A	G	1923	1	1	0	1	null	NEB	NA	Nemaline myopathy	16917880	exonic;nonsynonymous
2	152385774	C	G	1920	4	4	0	1	null	NEB	NA	Nemaline myopathy	15336686	exonic;nonsynonymous
2	152737393	C	A	1923	1	1	0	1	rs1805031	CACNB4	NA	Idiopathic epilepsy, generalised	10762541	exonic;nonsynonymous
2	157435621	T	C	1923	1	1	0	1	rs121918407	GPD2	NA	Diabetes mellitus, type 2	9070847	exonic;nonsynonymous
2	166740432	T	C	1923	1	1	0	1	null	TTC21B	NA	Joubert syndrome	21258341	exonic;nonsynonymous
2	166747445	G	C	1903	21	21	0	1	rs146496725	TTC21B	NA	Meckel-Gruber-like syndrome	21258341	exonic;nonsynonymous
2	166769021	T	C	1916	8	8	0	1	rs79037278	TTC21B	NA	Bardet-Biedl syndrome	21258341	intronic
2	166769088	G	A	1923	1	1	0	1	null	TTC21B	NA	Meckel-Gruber-like syndrome	21258341	exonic;nonsynonymous
2	166773969	T	C	1921	3	3	0	1	rs146320075	TTC21B	NA	Nephronophthisis	21258341	exonic;nonsynonymous
2	166785800	G	A	1923	1	1	0	1	null	TTC21B	NA	Jeune asphyxiating thoracic dystrophy	21258341	exonic;stopgain
2	166848003	G	C	1922	2	2	0	1	R1928G	SCN1A_HUMAN	Yes	(in severe myoclonic epilepsy in infancy).	NA	exonic;nonsynonymous
2	166850896	C	T	1923	1	1	0	1	null	SCN1A	NA	Dravet syndrome	18930999	exonic;nonsynonymous
2	166866307	T	A	1922	2	2	0	1	rs121917910	SCN1A	NA	Febrile seizures	19522081	exonic;nonsynonymous
2	166868749	G	A	1922	2	2	0	1	rs140731963	SCN1A	NA	Generalized epilepsy with febrile seizures plus	19522081	exonic;nonsynonymous
2	166872146	G	C	1920	4	4	0	1	rs121918799	SCN1A	NA	Hemiplegic migraine	18021921	exonic;nonsynonymous
2	167129256	C	A	1913	11	11	0	1	rs4369876a	SCN9A	NA	Small fibre neuropathy	21698661	exonic;nonsynonymous
2	167133540	T	G	1913	11	11	0	1	rs12478318	SCN9A	NA	Congenital indifference to pain	21939494	exonic;nonsynonymous
2	167137018	A	T	1922	2	2	0	1	null	SCN9A	NA	Small fibre neuropathy	21698661	exonic;nonsynonymous
2	167138296	T	C	1919	5	5	0	1	rs121908919	SCN9A	NA	Febrile seizures	19763161	exonic;nonsynonymous
2	167141109	G	T	1858	66	62	2	0.307825	rs41268673	SCN9A	NA	Erythermalgia, primary	15955112	exonic;nonsynonymous
2	167160752	G	C	1922	2	2	0	1	rs71428908	SCN9A	NA	Dravet syndrome	19763161	exonic;nonsynonymous
2	169828527	T	C	1923	1	1	0	1	null	ABCB11	NA	Intrahepatic cholestasis, familial progressive 2	18395098	exonic;nonsynonymous
2	169853219	C	T	1923	1	1	0	1	null	ABCB11	NA	Intrahepatic cholestasis, familial benign	19101985	exonic;nonsynonymous
2	172411153	G	A	1918	6	6	0	1	rs62181680	CYBRD1	NA	Iron overload	15338274	exonic;nonsynonymous
2	178879181	G	A	1917	7	7	0	1	rs76308115	PDE11A	NA	Adrenocortical hyperplasia	16767104	exonic;stopgain
2	179300991	G	A	1923	1	1	0	1	P222L	PRKRA_HUMAN	Yes	(in dystonia type 16).	NA	exonic;nonsynonymous
2	179325735	C	T	1751	173	147	13	0.0470837	rs17304212	DFNB59	NA	Progressive hearing loss, autosomal recessive	17718865	exonic;nonsynonymous
2	179325816	G	A	1877	47	45	1	0.437759	rs79399438	DFNB59	NA	Progressive hearing loss, autosomal recessive	17718865	exonic;nonsynonymous
2	179392277	A	G	1923	1	1	0	1	rs72629793	TTN	NA	Arrhythmogenic right ventricular cardiomyopathy	21810661	exonic;nonsynonymous
2	179399071	G	A	1922	2	2	0	1	rs140319117	TTN	NA	Myopathy	15802564	exonic;nonsynonymous
2	179567340	G	A	1918	6	6	0	1	rs72650011	TTN	NA	Arrhythmogenic right ventricular cardiomyopathy	21810661	exonic;nonsynonymous
2	179647533	C	T	1923	1	1	0	1	null	TTN	NA	Muscular dystrophy	22526018	exonic;splicing;nonsynonymous
2	189855743	G	A	1913	11	11	0	1	rs112185887	COL3A1	NA	Ehlers-Danlos syndrome, vascular-type	21086191	exonic;nonsynonymous
2	189872839	C	T	1923	1	1	0	1	null	COL3A1	NA	Ehlers-Danlos syndrome IV, vascular-type	21637106	exonic;stopgain
2	201943669	T	C	1919	5	5	0	1	null	NDUFB3	NA	Complex I deficiency	22277967	exonic;nonsynonymous
2	202074086	A	T	1917	7	7	0	1	rs80358239	CASP10	NA	Autoimmune lymphoproliferative syndrome II	16446975	exonic;nonsynonymous
2	203241529	G	A	1904	20	20	0	1	rs115604088	BMPR2	NA	Pulmonary arterial hypertension	19223935	UTR5
2	208994274	C	T	1896	28	28	0	1	rs61751949	CRYGC	NA	Cataract	21423869	exonic;nonsynonymous
2	209108301	T	C	1913	11	11	0	1	rs34599179	IDH1	NA	Osteoarthritis, early-onset	17406639	exonic;nonsynonymous
2	211503889	G	A	1923	1	1	0	1	null	CPS1	NA	Carbamoyl phosphate synthetase I deficiency	21120950	exonic;nonsynonymous
2	211521333	A	G	1921	3	3	0	1	rs141373204	CPS1	NA	Carbamoyl phosphate synthetase I deficiency	17310273	exonic;nonsynonymous
2	215595159	T	C	1919	5	5	0	1	rs147215925	BARD1	NA	Breast and/or ovarian cancer	21344236	exonic;synonymous
2	215632365	T	C	1923	1	1	0	1	null	BARD1	NA	Breast cancer	14550946	exonic;nonsynonymous
2	215851290	T	C	1923	1	1	0	1	N1380S	ABCAC_HUMAN	Yes	(in ichthyosis lamellar type 2; dbSNP:rs28940269).	NA	exonic;nonsynonymous
2	219028051	C	T	1923	1	1	0	1	null	CXCR1	NA	Acute pyelonephritis	17786197	UTR3
2	219527633	G	A	1923	1	1	0	1	null	BCS1L	NA	Pili torti and nerve deafness	17314340	exonic;nonsynonymous
2	219678877	C	T	1878	46	46	0	1	rs41272687	CYP27A1	NA	Cerebrotendinous xanthomatosis	10775536	exonic;nonsynonymous
2	219678911	G	A	1923	1	1	0	1	null	CYP27A1	NA	Cerebrotendinous xanthomatosis	9392430	splicing
2	219754756	C	T	1923	1	1	0	1	null	WNT10A	NA	Ectodermal dysplasia	20979233	exonic;nonsynonymous
2	219754978	G	A	1922	2	2	0	1	rs146902156	WNT10A	NA	Hypodontia	21484994	exonic;nonsynonymous
2	219755011	T	A	1880	44	42	1	0.395348	F228I	WN10A_HUMAN	Yes	(in odonto-onycho-dermal dysplasia [recessive?]).	NA	exonic;nonsynonymous
2	220439916	G	A	1871	53	53	0	1	rs12720062	INHA	NA	Premature ovarian failure	11098038	exonic;nonsynonymous
2	227661003	C	G	1900	24	24	0	1	rs41265094	IRS1	NA	Diabetes, NIDDM	7989470	exonic;nonsynonymous
2	228142227	G	A	1923	1	1	0	1	null	COL4A3	NA	Haematuria	14871398	exonic;nonsynonymous
2	228176554	C	T	1922	2	2	0	1	null	COL4A3	NA	Alport syndrome	11134255	exonic;nonsynonymous
2	233388180	G	T	1915	9	9	0	1	rs74703359	PRSS56	NA	Nanophthalmos	21850159	exonic;nonsynonymous
2	233390199	C	G	1799	125	117	4	1	rs61744404	PRSS56	NA	Microphthalmia	21532570	exonic;nonsynonymous
2	233396103	C	G	1914	10	10	0	1	rs41265127	CHRND	NA	Slow channel myasthenic syndrome	8872460	exonic;nonsynonymous
2	234669607	T	G	1922	2	2	0	1	V225G	UD11_HUMAN	Yes	(in Crigler-Najjar syndrome type 2 [dominant?]; dbSNP:rs35003977).	NA	exonic;nonsynonymous
2	234669768	A	T	1923	1	1	0	1	null	UGT1A1	NA	Crigler-Najjar syndrome 1	7989595	exonic;nonsynonymous
2	234676505	G	A	1923	1	1	0	1	R336Q	UD11_HUMAN	Yes	(in Crigler-Najjar syndrome type 1 [recessive?]).	NA	exonic;nonsynonymous
2	234681066	C	T	1923	1	1	0	1	rs72551360	UGT1A1	NA	Crigler-Najjar syndrome 1	1634050	exonic;nonsynonymous
2	238280504	C	T	1912	12	12	0	1	rs146092501	COL6A3	NA	Bethlem myopathy	15689448	exonic;nonsynonymous
2	238287746	C	T	1923	1	1	0	1	rs35227432	COL6A3	NA	Bethlem myopathy	15689448	exonic;nonsynonymous
2	241808308	C	A	1904	20	20	0	1	T9N	SPYA_HUMAN	Yes	(in hyperoxaluria primary type 1 [recessive?]).	NA	exonic;nonsynonymous
2	241815397	G	C	1923	1	1	0	1	rs146525143	AGXT	NA	Hyperoxaluria	19479957	exonic;nonsynonymous
2	242051838	C	T	1923	1	1	0	1	rs142827509	PASK	NA	Diabetes, MODY	22065581	exonic;nonsynonymous
2	242695399	G	A	1919	5	5	0	1	rs146578303	D2HGDH	NA	D-2-hydroxyglutaric aciduria	20020533	exonic;nonsynonymous
3	8787313	C	G	1922	2	2	0	1	rs116840776	CAV3	NA	Muscular dystrophy, limb girdle	9536092	exonic;nonsynonymous
3	8787330	C	T	1920	4	4	0	1	rs72546668	CAV3	NA	Long QT syndrome	17060380	exonic;nonsynonymous
3	9792107	G	A	1918	6	6	0	1	null	OGG1	NA	Colorectal cancer	21195604	exonic;splicing;nonsynonymous
3	9985083	C	T	1922	2	2	0	1	rs28942092	CRELD1	NA	Cardiac atrioventricular septal defect	12632326	exonic;nonsynonymous
3	9985136	C	T	1923	1	1	0	1	rs28942091	CRELD1	NA	Cardiac atrioventricular septal defect	12632326	exonic;nonsynonymous
3	10183799	A	T	1923	1	1	0	1	null	VHL	NA	Von Hippel-Lindau syndrome	NA	exonic;nonsynonymous
3	10401576	C	T	1900	24	24	0	1	rs61736451	ATP2B2	NA	Deafness, autosomal recessive 12, modifier of	15829536	exonic;nonsynonymous
3	15677019	G	A	1891	33	33	0	1	rs34885143	BTD	NA	Biotinidase deficiency	10400129	exonic;nonsynonymous
3	15683548	G	A	1923	1	1	0	1	null	BTD	NA	Biotinidase deficiency, partial	20224900	exonic;nonsynonymous
3	15685833	G	A	1922	2	2	0	1	rs146015592	BTD	NA	Biotinidase deficiency	9396567	exonic;nonsynonymous
3	15685874	G	A	1922	2	2	0	1	A171T	BTD_HUMAN	Yes	(in biotinidase deficiency [recessive?]; dbSNP:rs13073139).	NA	exonic;nonsynonymous
3	15686693	G	C	1844	80	76	2	0.677573	D444H	BTD_HUMAN	Yes	(in biotinidase deficiency [recessive?]; profound and partial; 52% decrease in activity; dbSNP:rs13078881).	NA	exonic;nonsynonymous
3	30713834	G	A	1919	5	5	0	1	rs35766612	TGFBR2	NA	Aortic aneurysm, thoracic	16791849	exonic;nonsynonymous
3	33114036	G	A	1923	1	1	0	1	T82M	BGAL_HUMAN	Yes	(in GM1-gangliosidosis type 3 [recessive?]; mild phenotype).	NA	exonic;splicing;nonsynonymous
3	37067410	G	A	1923	1	1	0	1	A441T	MLH1_HUMAN	Yes	(in hereditary non-polyposis colorectal cancer type 2 [dominant?]).	NA	exonic;nonsynonymous
3	37089131	A	C	1907	17	17	0	1	K618T	MLH1_HUMAN	Yes	(in hereditary non-polyposis colorectal cancer type 2 [dominant?]; type II).	NA	exonic;nonsynonymous
3	37090048	A	G	1923	1	1	0	1	rs35045067	MLH1	NA	Colorectal cancer, non-polyposis	11870161	exonic;nonsynonymous
3	38592012	C	A	1923	1	1	0	1	rs41315493	SCN5A	NA	Brugada syndrome	11901046	exonic;nonsynonymous
3	38592503	C	T	1923	1	1	0	1	null	SCN5A	NA	Long QT syndrome	10973849	exonic;nonsynonymous
3	38595797	A	T	1923	1	1	0	1	null	SCN5A	NA	Long QT syndrome	19716085	exonic;nonsynonymous
3	38639408	G	T	1922	2	2	0	1	rs45553235	SCN5A	NA	Long QT syndrome	12566525	exonic;nonsynonymous
3	38655248	A	G	1923	1	1	0	1	null	SCN5A	NA	Cardiac conduction disease	20564468	exonic;nonsynonymous
3	38655278	G	A	1923	1	1	0	1	rs45620037	SCN5A	NA	Nodal rhythm	14523039	exonic;nonsynonymous
3	46939587	C	T	1920	4	4	0	1	R150C	PTH1R_HUMAN	Yes	(in enchondromatosis; Ollier type; may be specific to the Canadian population; unclear pathogenicity).	NA	exonic;nonsynonymous
3	48603736	G	A	1920	4	4	0	1	R2791W	CO7A1_HUMAN	Yes	(in epidermolysis bullosa dystrophica [dominant?] [recessive?]; dominant).	NA	exonic;nonsynonymous
3	48608375	G	T	1919	5	5	0	1	rs34360255	COL7A1	NA	Epidermolysis bullosa dystrophica	19814614	exonic;synonymous
3	48610667	G	C	1923	1	1	0	1	rs151111203	COL7A1	NA	Epidermolysis bullosa dystrophica	16971478	exonic;synonymous
3	48611694	C	G	1923	1	1	0	1	null	COL7A1	NA	Epidermolysis bullosa dystrophica	10504458	splicing
3	48618917	C	T	1923	1	1	0	1	null	COL7A1	NA	Epidermolysis bullosa dystrophica	10504458	splicing
3	48621017	G	A	1916	8	8	0	1	rs79378857	COL7A1	NA	Epidermolysis bullosa dystrophica	16971478	exonic;nonsynonymous
3	49169568	T	C	1922	2	2	0	1	null	LAMB2	NA	Pierson syndrome	21236492	exonic;nonsynonymous
3	49456758	C	T	1905	19	19	0	1	E211K	GCST_HUMAN	Yes	(in non-ketotic hyperglycinemia [recessive?]).	NA	exonic;nonsynonymous
3	52021204	A	C	1923	1	1	0	1	null	ACY1	NA	Aminoacylase I deficiency	16465618	exonic;nonsynonymous
3	52023042	G	A	1911	13	11	1	0.0399846	null	ACY1	NA	Aminoacylase I deficiency	17562838	exonic;nonsynonymous
3	81698005	A	G	1920	4	4	0	1	rs192044702	GBE1	NA	Glycogen storage disease 4, non-lethal neuromuscular	19813197	splicing
3	93619677	C	T	1921	3	3	0	1	rs41267007	PROS1	NA	Protein S deficiency	11858485	exonic;nonsynonymous
3	93624903	G	T	1920	4	4	0	1	rs146366248	PROS1	NA	Protein S deficiency	7803790	exonic;nonsynonymous
3	120352080	T	C	1923	1	1	0	1	M368V	HGD_HUMAN	Yes	(in alkaptonuria [recessive?]; loss of activity).	NA	exonic;nonsynonymous
3	120400951	T	G	1922	2	2	0	1	null	HGD	NA	Alkaptonuria	19862842	exonic;nonsynonymous
3	121491530	C	T	1918	6	6	0	1	null	IQCB1	NA	Leber congenital amaurosis	22261762	exonic;nonsynonymous
3	121500619	G	A	1923	1	1	0	1	rs121918244	IQCB1	NA	Senior-Loken syndrome 5	15723066	exonic;stopgain
3	121980630	G	A	1922	2	2	0	1	E250K	CASR_HUMAN	Yes	(could be associated with familial hypocalciuric hypercalcemia type 1).	NA	exonic;nonsynonymous
3	127540645	G	A	1918	6	6	0	1	null	MGLL	NA	Obesity	21118518	exonic;nonsynonymous
3	128628254	G	A	1923	1	1	0	1	null	ACAD9	NA	Complex I deficiency	20816094	exonic;nonsynonymous
3	128780764	A	G	1918	6	6	0	1	N61S	GPIX_HUMAN	Yes	(in Bernard-Soulier syndrome; dbSNP:rs5030764).	NA	exonic;nonsynonymous
3	129180152	G	A	1923	1	1	0	1	null	IFT122	NA	Cranioectodermal dysplasia	20493458	intronic
3	129251438	G	T	1923	1	1	0	1	null	RHO	NA	Retinitis pigmentosa	21217109	exonic;nonsynonymous
3	132427031	G	A	1914	10	10	0	1	null	NPHP3	NA	Nephronophthisis 3	17855640	exonic;nonsynonymous
3	132441046	C	T	1874	50	50	0	1	null	NPHP3	NA	Nephronophthisis 3	17855640	exonic;nonsynonymous
3	135969266	C	A	1918	6	6	0	1	L17M	PCCB_HUMAN	Yes	(in propionic acidemia type II).	NA	exonic;nonsynonymous
3	136016902	G	A	1918	6	6	0	1	rs77820367	PCCB	NA	Propionic acidaemia	22033733	exonic;nonsynonymous
3	136047691	C	T	1922	2	2	0	1	A497V	PCCB_HUMAN	Yes	(in propionic acidemia type II; common mutation; does not affect either heteromeric or homomeric assembly).	NA	exonic;nonsynonymous
3	138663815	G	T	1915	9	9	0	1	rs180829214	FOXL2	NA	Blepharophimosis/ptosis/epicanthus inversus syndrome	19371227	UTR3
3	138664910	G	A	1922	2	2	0	1	rs104893741	FOXL2	NA	Blepharophimosis/ptosis/epicanthus inversus syndrome	11175783	exonic;stopgain
3	138664987	T	C	1923	1	1	0	1	K193R	FOXL2_HUMAN	Yes	(in blepharophimosis; ptosis; and epicanthus inversus syndrome [dominant?]; type II).	NA	exonic;nonsynonymous
3	138665815	C	T	1917	7	7	0	1	rs145924266	FOXL2	NA	Blepharophimosis/ptosis/epicanthus inversus syndrome	19371227	UTR5
3	148896396	C	G	1919	5	5	0	1	rs139633388	CP	NA	Aceruloplasminaemia	16629161	exonic;nonsynonymous
3	150690378	A	C	1923	1	1	0	1	C40G	CLRN1_HUMAN	Yes	(in Usher syndrome type 3).	NA	exonic;nonsynonymous
3	182775100	G	A	1923	1	1	0	1	null	MCCC1	NA	3-methylcrotonyl-CoA carboxylase deficiency	16010683	exonic;splicing;nonsynonymous
3	184071575	C	T	1922	2	2	0	1	rs137852682	CLCN2	NA	Idiopathic epilepsy, generalised	19191339	exonic;nonsynonymous
3	184075476	C	T	1923	1	1	0	1	rs71318369	CLCN2	NA	Idiopathic epilepsy, generalised	19191339	exonic;nonsynonymous
3	184076765	C	T	1920	4	4	0	1	rs144412275	CLCN2	NA	Epilepsy, idiopathic	21703448	exonic;synonymous
3	186970978	C	T	1923	1	1	0	1	null	MASP1	NA	Facial, umbilical, coccygeal & auditory anomalies	21035106	exonic;stopgain
3	193171979	T	A	1735	189	167	11	0.470253	rs35424709	ATP13A4	NA	Autism spectrum disorder	15925480	exonic;nonsynonymous
3	193361167	A	G	1923	1	1	0	1	I382M	OPA1_HUMAN	Yes	(in optic atrophy type 1 [dominant?]).	NA	exonic;nonsynonymous
4	629702	T	C	1903	21	21	0	1	Y219H	PDE6B_HUMAN	Yes	(in retinitis pigmentosa; autosomal recessive).	NA	exonic;nonsynonymous
4	658734	G	A	1923	1	1	0	1	null	PDE6B	NA	Retinitis pigmentosa	7724547	splicing
4	981743	C	T	1909	15	15	0	1	rs147498923	IDUA	NA	Hurler syndrome	19839758	UTR3
4	3475166	C	T	1912	12	12	0	1	rs62272670	DOK7	NA	Congenital myasthenic syndromes	17439981	exonic;nonsynonymous
4	4861745	C	G	1527	397	331	33	0.139275	rs36059701	MSX1	NA	Cleft lip and palate	15379328	exonic;nonsynonymous
4	6293040	A	C	1916	8	8	0	1	rs41264699	WFS1	NA	Sensorineural hearing loss	12073007	exonic;nonsynonymous
4	6293740	G	A	1922	2	2	0	1	rs71524367	WFS1	NA	Wolfram syndrome	11295831	intronic
4	6303195	G	A	1923	1	1	0	1	null	WFS1	NA	Wolfram syndrome	12754709	exonic;nonsynonymous
4	6303849	A	T	1921	3	3	0	1	rs56002719	WFS1	NA	Wolfram syndrome	15277431	exonic;nonsynonymous
4	6303974	C	T	1912	12	12	0	1	R818C	WFS1_HUMAN	Yes	(in Wolfram syndrome [recessive?]; dbSNP:rs35932623).	NA	exonic;nonsynonymous
4	6304133	G	A	1906	18	18	0	1	rs71532874	WFS1	NA	Diabetes, type 1, and sensorineural hearing loss	12107816	exonic;nonsynonymous
4	15542617	C	T	1922	2	2	0	1	null	CC2D2A	NA	Joubert syndrome	19777577	exonic;nonsynonymous
4	47939552	G	A	1921	3	3	0	1	S320F	CNGA1_HUMAN	Yes	(in retinitis pigmentosa autosomal recessive [recessive?]).	NA	exonic;nonsynonymous
4	55524252	G	A	1906	18	18	0	1	rs72550820	KIT	NA	Piebaldism	7529964	intronic
4	55972946	A	G	1863	61	61	0	0.620115	C482R	VGFR2_HUMAN	Yes	(in hemangioma capillary infantile susceptibility; expression of FLT1 in hemangioma endothelial cells is markedly reduced and KDR activity is increased compared to controls; low FLT1 expression in hemangioma cells is caused by reduced activity of a pathway involving ITGB1; ANTXR1; KDR and NFATC2IP; the mutation predicts to result in loss-of-function and disruption of the normal association of the…	NA	exonic;nonsynonymous
4	68619618	G	A	1922	2	2	0	1	rs144900788	GNRHR	NA	Hypogonadotropic hypogonadism	16359986	exonic;nonsynonymous
4	68619737	T	C	1908	16	16	0	1	Q106R	GNRHR_HUMAN	Yes	(in idiopathic hypogonadotropic hypogonadism and fertile eunuch syndrome; decreases but does not eliminate GnRH binding).	NA	exonic;nonsynonymous
4	77476772	G	T	1918	6	6	0	1	null	SHROOM3	NA	Heterotaxy	21936905	exonic;nonsynonymous
4	79188076	T	G	1915	9	9	0	1	null	FRAS1	NA	Renal agenesis	21900877	exonic;nonsynonymous
4	88533540	A	T	1816	108	94	7	0.0255059	R68W	DSPP_HUMAN	Yes	(in dentinogenesis imperfecta Shields type 2 [dominant?]; dbSNP:rs36094464).	NA	exonic;nonsynonymous
4	88929453	G	A	1896	28	28	0	1	null	PKD2	NA	Polycystic kidney disease 2	15192819	exonic;nonsynonymous
4	88989089	A	C	1918	6	6	0	1	rs2234917	PKD2	NA	Polycystic kidney disease 2	19936001	exonic;nonsynonymous
4	88989111	G	A	1922	2	2	0	1	R807Q	PKD2_HUMAN	Yes	(in polycystic kidney disease autosomal dominant type 2 [dominant?]).	NA	exonic;nonsynonymous
4	110663642	C	A	1897	27	27	0	1	rs114013791	CFI	NA	Haemolytic uraemic syndrome	16621965	intronic
4	110670750	G	A	1922	2	2	0	1	rs121964917	CFI	NA	Haemolytic uraemic syndrome	16621965	exonic;nonsynonymous
4	110681527	C	T	1915	9	9	0	1	rs112534524	CFI	NA	Membranoproliferative glomerulonephritis	17018561	exonic;nonsynonymous
4	110682846	C	T	1922	2	2	0	1	null	CFI	NA	Thrombotic microangiopathy following transplantation	18557729	exonic;nonsynonymous
4	110685721	C	T	1923	1	1	0	1	null	CFI	NA	Haemolytic uraemic syndrome, atypical	20106822	exonic;nonsynonymous
4	110685820	C	T	1922	2	2	0	1	rs141853578	CFI	NA	Haemolytic uraemic syndrome, atypical	20513133	exonic;nonsynonymous
4	114286207	T	A	1916	8	8	0	1	rs66785829	ANK2	NA	Cardiac arrhythmia	17242276	exonic;nonsynonymous
4	114294462	C	T	1922	2	2	0	1	R3873W	ANK2_HUMAN	Yes	(in long QT syndrome type 4; loss of function).	NA	exonic;nonsynonymous
4	114294537	G	A	1920	4	4	0	1	E3898K	ANK2_HUMAN	Yes	(in long QT syndrome type 4; loss of function).	NA	exonic;nonsynonymous
4	155491798	A	G	1923	1	1	0	1	null	FGB	NA	Haemorrhages	NA	exonic;nonsynonymous
4	155527225	T	C	1907	17	17	0	1	rs2066862	FGG	NA	Dysfibrinogenaemia	8470043	intronic
4	155529674	C	A	1923	1	1	0	1	null	FGG	NA	Dysfibrinogenaemia	15748264	exonic;nonsynonymous
4	155533035	G	C	1918	6	6	0	1	rs148685782	FGG	NA	Hypofibrinogenaemia	10688828	exonic;nonsynonymous
4	155533353	C	T	1922	2	2	0	1	null	FGG	NA	Dysfibrinogenaemia	21725578	exonic;splicing;nonsynonymous
4	166924623	T	C	1923	1	1	0	1	V238A	TLL1_HUMAN	Yes	(in atrial septal defect type 6).	NA	exonic;nonsynonymous
4	178363496	C	A	1890	34	32	1	0.256779	rs74626221	AGA	NA	Aspartylglucosaminuria	11309371	exonic;nonsynonymous
4	187117196	A	G	1923	1	1	0	1	M123V	CP4V2_HUMAN	Yes	(in Bietti crystalline corneoretinal dystrophy [recessive?]).	NA	exonic;nonsynonymous
4	187178437	G	A	1923	1	1	0	1	rs121964951	KLKB1	NA	Prekallikrein deficiency	14652634	exonic;nonsynonymous
4	187205426	G	A	1912	12	12	0	1	rs116667976	F11	NA	Factor XI deficiency	19652879	intronic
5	1212453	G	A	1921	3	3	0	1	D173N	S6A19_HUMAN	Yes	(in Hartnup disorder [recessive?]; population allele frequency among Europeans is 0.007; reduces transport activity by 50% but does not completely inactivates the transporter).	NA	exonic;nonsynonymous
5	1293767	G	A	1909	15	15	0	1	rs34094720	TERT	NA	Aplastic anaemia	15814878	exonic;nonsynonymous
5	1403128	G	A	1921	3	3	0	1	rs28364997	SLC6A3	NA	Bipolar affective disorder	10889530	exonic;nonsynonymous
5	13781044	G	C	1917	7	7	0	1	null	DNAH5	NA	Primary ciliary dyskinesia	22416021	exonic;nonsynonymous
5	34007971	A	G	1923	1	1	0	1	S52P	AMACR_HUMAN	Yes	(in alpha-methylacyl-CoA racemase deficiency and congenital bile acid synthesis defect type 4; inactive enzyme).	NA	exonic;nonsynonymous
5	37044446	T	C	1912	12	12	0	1	rs145778995	NIPBL	NA	Cornelia de Lange syndrome	15318302	intronic
5	37187590	G	A	1923	1	1	0	1	null	C5orf42	NA	Joubert syndrome	22425360	exonic;nonsynonymous
5	37815941	C	T	1921	3	3	0	1	rs76466003	GDNF	NA	Hirschsprung disease	8896569	exonic;nonsynonymous
5	37816112	G	A	1915	9	9	0	1	rs36119840	GDNF	NA	Hirschsprung disease	8896568	exonic;nonsynonymous
5	39341369	A	C	1923	1	1	0	1	C119G	CO9_HUMAN	Yes	(in complement component 9 deficiency).	NA	exonic;nonsynonymous
5	39342214	G	T	1921	3	3	0	1	rs34000044	C9	NA	Complement C9 deficiency	9144525	exonic;stopgain
5	40955530	G	C	1923	1	1	0	1	rs121964921	C7	NA	Complement C7 deficiency	8871666	exonic;nonsynonymous
5	40959622	C	A	1919	5	5	0	1	R521S	CO7_HUMAN	Yes	(in complement component 7 deficiency).	NA	exonic;nonsynonymous
5	41150035	A	G	1920	4	4	0	1	rs76202909	C6	NA	Complement C6 deficiency, subtotal	7535801	splicing
5	41862819	G	A	1909	15	15	0	1	rs76956231	OXCT1	NA	Complex I deficiency	20818383	exonic;nonsynonymous
5	42700021	C	T	1912	12	12	0	1	R179C	GHR_HUMAN	Yes	(in Laron dwarfism and short stature; idiopathic autosomal).	NA	exonic;nonsynonymous
5	53751640	G	T	1922	2	2	0	1	null	HSPB3	NA	Motor neuropathy	20142617	exonic;nonsynonymous
5	56171018	G	A	1923	1	1	0	1	rs143853590	MAP3K1	NA	Disorders of sex development	21129722	exonic;nonsynonymous
5	69372372	G	C	1921	3	3	0	1	rs121909192	SMN2	NA	Spinal muscular atrophy, modifier of	19716110	exonic;nonsynonymous
5	70945029	T	C	1921	3	3	0	1	rs139852818	MCCC2	NA	Complex I deficiency	20818383	exonic;nonsynonymous
5	74016442	G	A	1923	1	1	0	1	null	HEXB	NA	Sandhoff disease	2522450	intronic
5	76331449	G	A	1891	33	33	0	1	E133K	AGGF1_HUMAN	Yes	(in Klippel-Trenaunay syndrome; in 5 patients; displays a stronger angiogenic activity; dbSNP:rs34203073).	NA	exonic;nonsynonymous
5	78280974	G	A	1878	46	46	0	1	null	ARSB	NA	Mucopolysaccharidosis VI	17458871	exonic;nonsynonymous
5	89979568	G	A	1917	7	7	0	1	rs41302834	GPR98	NA	Usher syndrome 3	21569298	exonic;nonsynonymous
5	95759021	T	C	1923	1	1	0	1	null	PCSK1	NA	Obesity	22210313	exonic;nonsynonymous
5	110428085	C	G	1912	12	12	0	1	rs35629723	WDR36	NA	Glaucoma, primary open angle	18172102	exonic;nonsynonymous
5	110441839	G	A	1916	8	8	0	1	A449T	WDR36_HUMAN	Yes	(in primary open angle glaucoma type 1G; dbSNP:rs35703638).	NA	exonic;nonsynonymous
5	110445979	G	A	1923	1	1	0	1	R529Q	WDR36_HUMAN	Yes	(in primary open angle glaucoma type 1G).	NA	exonic;nonsynonymous
5	110454719	A	G	1912	12	12	0	1	D658G	WDR36_HUMAN	Yes	(in primary open angle glaucoma type 1G; dbSNP:rs34595252).	NA	exonic;nonsynonymous
5	112154969	C	T	1923	1	1	0	1	R414C	APC_HUMAN	Yes	(in familial adenomatous polyposis).	NA	exonic;nonsynonymous
5	112174368	A	G	1923	1	1	0	1	null	APC	NA	Adenomatous polyposis coli, attenuated	18166348	exonic;nonsynonymous
5	112177092	C	T	1923	1	1	0	1	null	APC	NA	Colorectal adenoma	18199528	exonic;nonsynonymous
5	112178112	C	T	1923	1	1	0	1	rs34919187	APC	NA	Adenomatous polyposis coli	18199528	exonic;nonsynonymous
5	118788316	G	A	1922	2	2	0	1	G16S	DHB4_HUMAN	Yes	(in D-bifunctional protein deficiency).	NA	exonic;nonsynonymous
5	125919689	G	A	1923	1	1	0	1	null	ALDH7A1	NA	Epilepsy, pyridoxine-dependent	16491085	exonic;stopgain
5	127702112	C	T	1921	3	3	0	1	G754S	FBN2_HUMAN	Yes	(in congenital contractural arachnodactyly [dominant?]).	NA	exonic;nonsynonymous
5	127744469	G	A	1900	24	24	0	1	rs28763954	FBN2	NA	Contractural arachnodactyly	18767143	exonic;nonsynonymous
5	131729380	G	A	1916	8	8	0	1	rs28383481	SLC22A5	NA	Carnitine deficiency, systemic primary	16652335	exonic;nonsynonymous
5	133942700	A	T	1923	1	1	0	1	rs28942110	SAR1B	NA	Chylomicron retention disease	12692552	exonic;nonsynonymous
5	135391462	A	G	1920	4	4	0	1	rs188677757	TGFBI	NA	Corneal dystrophy	19303004	exonic;nonsynonymous
5	135398363	G	C	1923	1	1	0	1	rs121909217	TGFBI	NA	Corneal dystrophy, epithelial basement membrane	16652336	exonic;nonsynonymous
5	138283171	C	T	1923	1	1	0	1	null	SIL1	NA	Marinesco-Sjogren syndrome	18285827	intronic
5	147207585	C	T	1923	1	1	0	1	rs141634296	SPINK1	NA	Pancreatitis, chronic	11368029	exonic;splicing;nonsynonymous
5	147207678	T	C	1907	17	17	0	1	N34S	ISK1_HUMAN	Yes	(in hereditary pancreatitis [dominant?] and Tchronic pancreatitis [dominant?]; may confer susceptibility to fibrocalculous pancreatic diabetes; dbSNP:rs17107315).	NA	exonic;nonsynonymous
5	147211105	C	G	1923	1	1	0	1	rs35877720	SPINK1	NA	Pancreatitis, chronic	NA	exonic;nonsynonymous
5	148384455	T	A	1913	11	11	0	1	rs146920285	SH3TC2	NA	Charcot-Marie-Tooth disease 4C	21291453	exonic;nonsynonymous
5	148406435	G	A	1922	2	2	0	1	rs80338933	SH3TC2	NA	Charcot-Marie-Tooth disease 4C	14574644	exonic;stopgain
5	148422281	A	G	1917	7	7	0	1	rs80359890	SH3TC2	NA	Charcot-Marie-Tooth disease 1	20220177	exonic;nonsynonymous
5	149274769	G	T	1923	1	1	0	1	Q569K	PDE6A_HUMAN	Yes	(in retinitis pigmentosa autosomal recessive [recessive?]).	NA	exonic;nonsynonymous
5	149360630	C	T	1884	40	40	0	1	rs78676079	SLC26A2	NA	Diastrophic dysplasia	11241838	exonic;nonsynonymous
5	149740732	C	T	1920	4	4	0	1	rs56180593	TCOF1	NA	Treacher-Collins syndrome	12444270	exonic;nonsynonymous
5	149753894	G	A	1922	2	2	0	1	rs144327167	TCOF1	NA	Treacher-Collins syndrome	15340364	exonic;nonsynonymous
5	151202476	C	T	1896	28	28	0	1	rs116474260	GLRA1	NA	Hyperekplexia	10817489	exonic;nonsynonymous
5	151231025	G	A	1923	1	1	0	1	rs139058916	GLRA1	NA	Hyperekplexia	20631190	exonic;nonsynonymous
5	169535482	G	T	1923	1	1	0	1	null	FOXI1	NA	Pendred syndrome	17503324	exonic;nonsynonymous
5	172660004	C	T	1912	12	12	0	1	rs72554028	NKX2-5	NA	Cardiac disease	19464101	exonic;synonymous
5	176048219	G	T	1923	1	1	0	1	rs104893937	SNCB	NA	Dementia with Lewy bodies	15365127	exonic;nonsynonymous
5	176836590	G	A	1918	6	6	0	1	rs187018744	F12	NA	Factor XII deficiency	18832903	upstream
5	177420032	C	T	1923	1	1	0	1	null	PROP1	NA	Pituitary hormone deficiency	12464226	exonic;nonsynonymous
5	179263445	C	T	1921	3	3	0	1	P392L	SQSTM_HUMAN	Yes	(in Paget disease of bone; no effect on polyubiquitin-binding).	NA	exonic;nonsynonymous
6	6167822	C	T	1914	10	10	0	1	rs138754417	F13A1	NA	Factor XIII deficiency	20179087	exonic;nonsynonymous
6	6174830	G	A	1917	7	7	0	1	rs143711562	F13A1	NA	Factor XIII deficiency	NA	exonic;nonsynonymous
6	6305671	G	A	1923	1	1	0	1	null	F13A1	NA	Factor XIII deficiency	12015062	exonic;nonsynonymous
6	7542236	G	A	1920	4	4	0	1	rs121912998	DSP	NA	Cardiomyopathy, arrhythmogenic right ventricular	16917092	exonic;nonsynonymous
6	7570791	G	A	1922	2	2	0	1	rs148147581	DSP	NA	Cardiomyopathy, arrhythmogenic right ventricular	16774985	exonic;nonsynonymous
6	7580795	C	G	1919	5	5	0	1	rs28763965	DSP	NA	Arrhythmogenic right ventricular dysplasia/cardiomyopathy	21636032	exonic;nonsynonymous
6	7586120	T	A	1900	24	24	0	1	rs11558732	DSP	NA	Cardiomyopathy, arrhythmogenic right ventricular	21723241	UTR3
6	18122506	G	A	1155	769	481	144	0.202412	rs10949483	NHLRC1	NA	Myoclonic epilepsy of Lafora	16529633	exonic;nonsynonymous
6	24505099	G	A	1923	1	1	0	1	rs118203982	ALDH5A1	NA	Succinic semialdehyde dehydrogenase deficiency	11243727	exonic;stopgain
6	26091306	T	C	1923	1	1	0	1	rs28934596	HFE	NA	Haemochromatosis	10575540	exonic;nonsynonymous
6	31915584	A	C	1922	2	2	0	1	rs144812066	CFB	NA	Haemolytic uraemic syndrome, atypical	20513133	exonic;nonsynonymous
6	32006387	A	T	1870	54	54	0	1	null	CYP21A2	NA	Non-classic 21-hydroxylase deficiency	18319307	intergenic
6	32008500	G	A	1904	20	20	0	1	null	CYP21A2	NA	Adrenal hyperplasia	17119906	downstream
6	32052313	C	T	1923	1	1	0	1	null	TNXB	NA	Ehlers-Danlos syndrome, autosomal recessive	15733269	exonic;nonsynonymous
6	33146747	G	A	1920	4	4	0	1	rs145499142	COL11A2	NA	Osteoarthritis, early-onset	15922184	exonic;nonsynonymous
6	39877617	A	G	1922	2	2	0	1	rs143912353	MOCS1	NA	Molybdenum cofactor deficiency	16429380	exonic;nonsynonymous
6	42141500	C	T	1921	3	3	0	1	rs104893968	GUCA1A	NA	Cone dystrophy, autosomal dominant	11146732	exonic;nonsynonymous
6	42666208	G	A	1923	1	1	0	1	rs144626779	PRPH2	NA	Cone dystrophy	9279751	exonic;nonsynonymous
6	42689979	T	C	1922	2	2	0	1	rs61755767	PRPH2	NA	Macular dystrophy	NA	exonic;nonsynonymous
6	42930887	C	A	1920	4	4	0	1	H177N	GNMT_HUMAN	Yes	(in GNMT deficiency; 75% wild-type activity; decreases stability of the tetramer).	NA	exonic;nonsynonymous
6	42935188	C	T	1917	7	7	0	1	rs34324426	PEX6	NA	Zellweger syndrome C	19105186	exonic;nonsynonymous
6	49407986	C	T	1923	1	1	0	1	G630E	MUTA_HUMAN	Yes	(in methylmalonic aciduria type mut; mut0).	NA	exonic;nonsynonymous
6	49416574	G	A	1922	2	2	0	1	null	MUT	NA	Methylmalonic aciduria	12402345	exonic;stopgain
6	49425466	A	T	1923	1	1	0	1	Y231N	MUTA_HUMAN	Yes	(in methylmalonic aciduria type mut; mut-).	NA	exonic;nonsynonymous
6	49426975	T	C	1921	3	3	0	1	rs115923556	MUT	NA	Methylmalonic aciduria	15781192	exonic;nonsynonymous
6	49580247	C	T	1871	53	53	0	1	V270I	RHAG_HUMAN	Yes	(in regulator type Rh-null hemolytic anemia; dbSNP:rs16879498).	NA	exonic;splicing;nonsynonymous
6	51611651	C	A	1909	15	15	0	1	rs148932323	PKHD1	NA	Polycystic kidney disease	15805161	exonic;nonsynonymous
6	51637561	T	C	1919	5	5	0	1	S2861G	PKHD1_HUMAN	Yes	(in polycystic kidney disease autosomal recessive [recessive?]).	NA	exonic;nonsynonymous
6	51824808	T	A	1922	2	2	0	1	rs150838488	PKHD1	NA	Polycystic kidney disease	15698423	exonic;nonsynonymous
6	51889474	C	T	1923	1	1	0	1	rs141103838	PKHD1	NA	Polycystic kidney disease	19914852	exonic;nonsynonymous
6	51889483	G	A	1918	6	6	0	1	rs45517932	PKHD1	NA	Polycystic kidney disease	12874454	exonic;nonsynonymous
6	51913356	G	A	1922	2	2	0	1	null	PKHD1	NA	Polycystic kidney disease	15805161	exonic;stopgain
6	51917987	G	C	1923	1	1	0	1	rs115045643	PKHD1	NA	Polycystic kidney disease	15698423	exonic;nonsynonymous
6	51923291	C	G	1919	5	5	0	1	rs149781976	PKHD1	NA	Polycystic kidney disease	15805161	exonic;nonsynonymous
6	51944754	C	T	1923	1	1	0	1	rs149841071	PKHD1	NA	Polycystic kidney disease	15698423	exonic;nonsynonymous
6	51947999	G	A	1921	3	3	0	1	T36M	PKHD1_HUMAN	Yes	(in polycystic kidney disease autosomal recessive [recessive?]; common mutation; dbSNP:rs28939383).	NA	exonic;nonsynonymous
6	52317597	T	C	1915	9	9	0	1	F229L	EFHC1_HUMAN	Yes	(in juvenile myoclonic epilepsy type 1; uncertain pathological significance; reduces substantially the cell death effect; reduces significantly the calcium influx; binds to CACNA1E).	NA	exonic;nonsynonymous
6	52329833	C	T	1923	1	1	0	1	R353W	EFHC1_HUMAN	Yes	(in juvenile myoclonic epilepsy type 1).	NA	exonic;nonsynonymous
6	55039413	C	T	1923	1	1	0	1	rs41271310	HCRTR2	NA	Tourette syndrome	15274044	exonic;nonsynonymous
6	55039416	C	A	1908	16	16	0	1	rs41271312	HCRTR2	NA	Excessive daytime sleepiness	15274044	exonic;nonsynonymous
6	74331587	A	C	1923	1	1	0	1	null	SLC17A5	NA	Sialic acid storage disease, infantile	10947946	exonic;stopgain
6	107956029	C	T	1908	16	16	0	1	null	SOBP	NA	Intellectual disability	21035105	exonic;stopgain
6	121768294	C	T	1923	1	1	0	1	null	GJA1	NA	Oculodentodigital dysplasia	20597923	exonic;stopgain
6	121769120	G	A	1923	1	1	0	1	R376Q	CXA1_HUMAN	Yes	(in hypoplastic left heart syndrome; in one individual with atrioventricular septal defect; associated with Gln-362; abolishes phosphorylation by PKA and PKC).	NA	exonic;nonsynonymous
6	129635800	G	A	1839	85	77	4	0.109135	rs2306942	LAMA2	NA	Muscular dystrophy, merosin deficient	19294599	exonic;splicing;nonsynonymous
6	129722453	C	A	1898	26	26	0	1	rs56173620	LAMA2	NA	Muscular dystrophy, congenital 1A	20207543	exonic;nonsynonymous
6	132206079	C	T	1851	73	71	1	1	rs28933977	ENPP1	NA	Idiopathic infantile arterial calcification	12881724	exonic;nonsynonymous
6	132206089	A	G	1922	2	2	0	1	rs147346173	ENPP1	NA	Generalized arterial calcification of infancy	20016754	exonic;nonsynonymous
6	137219351	T	A	1922	2	2	0	1	rs1805137	PEX7	NA	Rhizomelic chondrodysplasia punctata	9090381	exonic;stopgain
6	144508380	G	A	1922	2	2	0	1	rs145347140	STX11	NA	Haemophagocytic lymphohistiocytosis, familial	20486178	exonic;nonsynonymous
6	152461162	C	T	1922	2	2	0	1	E8461K	SYNE1_HUMAN	Yes	(in Emery-Dreifuss muscular dystrophy type 4).	NA	exonic;nonsynonymous
6	161127501	A	G	1908	16	16	0	1	K38E	PLMN_HUMAN	Yes	(in plasminogen deficiency; common mutation).	NA	exonic;nonsynonymous
6	161137766	G	A	1923	1	1	0	1	rs143034754	PLG	NA	Plasminogen deficiency	16849641	exonic;nonsynonymous
6	161771219	G	A	1921	3	3	0	1	P437L	PRKN2_HUMAN	Yes	(in Parkinson disease; early and late onset).	NA	exonic;nonsynonymous
6	162206852	G	A	1922	2	2	0	1	R275W	PRKN2_HUMAN	Yes	(in Parkinson disease2 and PARK; early and late onset; impairs the ability to ubiquitinate SNCAIP; dbSNP:rs34424986).	NA	exonic;nonsynonymous
6	162206892	T	C	1922	2	2	0	1	rs9456711	PARK2	NA	Parkinson disease, autosomal recessive	11971093	exonic;synonymous
6	162683724	G	T	1912	12	12	0	1	A82E	PRKN2_HUMAN	Yes	(in Parkinson disease2 and PARK; dbSNP:rs55774500).	NA	exonic;nonsynonymous
6	166574346	G	A	1911	13	13	0	1	rs117097130	T	NA	Vertebral malformation	18466071	exonic;nonsynonymous
7	35280519	G	A	1922	2	2	0	1	null	TBX20	NA	Congenital heart disease	18834961	exonic;nonsynonymous
7	40498796	C	T	1920	4	4	0	1	R336W	CG010_HUMAN	Yes	(in glutaric aciduria type 3; healthy individuals who have abnormal quantities of glutaric acid but low 3-hydroxyglutaric acid).	NA	exonic;splicing;nonsynonymous
7	42007201	T	C	1919	5	5	0	1	rs62622373	GLI3	NA	Greig cephalopolysyndactyly syndrome	10441342	exonic;nonsynonymous
7	42007446	C	T	1913	11	11	0	1	rs121917710	GLI3	NA	Postaxial polydactyly A/B	10441570	exonic;nonsynonymous
7	44186044	C	T	1914	10	10	0	1	rs150914617	GCK	NA	Diabetes mellitus	19515026	intronic
7	44186170	A	G	1923	1	1	0	1	null	GCK	NA	Diabetes, MODY	11942313	exonic;nonsynonymous
7	44189603	C	T	1923	1	1	0	1	null	GCK	NA	Diabetes, NIDDM	8433729	exonic;nonsynonymous
7	44578500	G	A	1919	5	5	0	1	rs35803101	NPC1L1	NA	Low dietary cholesterol absorption	16449388	exonic;nonsynonymous
7	44579475	C	T	1921	3	3	0	1	rs116204045	NPC1L1	NA	High dietary cholesterol absorption	16449388	exonic;nonsynonymous
7	48450137	A	G	1923	1	1	0	1	rs78333373	ABCA13	NA	Bipolar disorder	19944402	exonic;nonsynonymous
7	65444841	C	T	1918	6	6	0	1	rs149606212	GUSB	NA	Mucopolysaccharidosis VII	7573038	exonic;nonsynonymous
7	65546812	G	A	1920	4	4	0	1	rs145138923	ASL	NA	Argininosuccinate lyase deficiency	11747432	exonic;nonsynonymous
7	65548107	C	T	1922	2	2	0	1	rs143793815	ASL	NA	Argininosuccinate lyase deficiency	12384776	exonic;nonsynonymous
7	66459197	A	G	1921	3	3	0	1	rs113993993	SBDS	NA	Shwachman-Diamond syndrome	12496757	splicing
7	72745738	C	T	1913	11	11	0	1	rs147213094	FKBP6	NA	Azoospermia, non-obstructive	16227348	exonic;nonsynonymous
7	75610404	T	A	1923	1	1	0	1	null	POR	NA	POR deficiency	19837910	exonic;nonsynonymous
7	75610876	C	T	1918	6	6	0	1	rs17853284	POR	NA	POR deficiency	16467261	exonic;nonsynonymous
7	75612866	G	C	1923	1	1	0	1	rs121912974	POR	NA	Disordered steroidogenesis	14758361	exonic;nonsynonymous
7	75615552	G	A	1919	5	5	0	1	rs145782750	POR	NA	POR deficiency	16467261	exonic;nonsynonymous
7	81334825	C	T	1923	1	1	0	1	null	HGF	NA	Lymphoedema	18564920	exonic;nonsynonymous
7	81601108	C	T	1914	10	10	0	1	rs78086631	CACNA2D1	NA	Brugada syndrome	20817017	exonic;nonsynonymous
7	87049345	C	T	1923	1	1	0	1	rs8187801	ABCB4	NA	Low phospholipid associated cholelithiasis	12891548	exonic;nonsynonymous
7	87049384	G	A	1921	3	3	0	1	rs148052192	ABCB4	NA	Intrahepatic cholestasis, familial progressive	17726488	exonic;nonsynonymous
7	87053289	G	A	1920	4	4	0	1	rs138773456	ABCB4	NA	Intrahepatic cholestasis, familial progressive	17726488	exonic;nonsynonymous
7	87060830	G	A	1922	2	2	0	1	null	ABCB4	NA	Intrahepatic cholestasis, familial progressive	20422496	exonic;stopgain
7	87079369	C	G	1923	1	1	0	1	null	ABCB4	NA	Intrahepatic cholestasis, familial progressive	17726488	exonic;nonsynonymous
7	92123881	C	T	1921	3	3	0	1	rs61750425	PEX1	NA	Zellweger syndrome	11389485	exonic;nonsynonymous
7	92130876	C	T	1922	2	2	0	1	G843D	PEX1_HUMAN	Yes	(in infantile Refsum disease and adrenoleukodystrophy neonatal).	NA	exonic;nonsynonymous
7	92135565	G	A	1923	1	1	0	1	rs61750409	PEX1	NA	Neonatal adrenoleukodystrophy	11439091	exonic;stopgain
7	92147105	C	T	1923	1	1	0	1	null	PEX1	NA	Peroxisome biogenesis disorder	21846392	exonic;nonsynonymous
7	94056984	G	A	1922	2	2	0	1	null	COL1A2	NA	Osteogenesis imperfecta I	21667357	exonic;nonsynonymous
7	99032559	G	A	1910	14	14	0	1	null	PTCD1	NA	Complex I deficiency	20818383	exonic;nonsynonymous
7	100225917	C	T	1920	4	4	0	1	rs80338885	TFR2	NA	Haemochromatosis	17562347	exonic;nonsynonymous
7	100771717	G	A	1695	229	201	14	0.877876	rs6092	SERPINE1	NA	Plasminogen activator inhibitor 1 deficiency	15650551	exonic;nonsynonymous
7	103062016	T	C	1898	26	26	0	1	rs116900495	SLC26A5	NA	Deafness, non-syndromic	12719379	splicing
7	107301201	T	C	1911	13	13	0	1	rs60284988	SLC26A4	NA	Pendred syndrome	17503324	ncRNA_UTR5
7	107302082	A	G	1923	1	1	0	1	null	SLC26A4	NA	Enlarged vestibular aqueduct & Mondini dysplasia	16570074	ncRNA_exonic
7	107312690	G	T	1922	2	2	0	1	V138F	S26A4_HUMAN	Yes	(in Pendred syndrome [recessive?]; fails to localize to cell membrane; abolishes iodide transport).	NA	exonic;nonsynonymous
7	107315415	G	T	1922	2	2	0	1	G209V	S26A4_HUMAN	Yes	(in deafness autosomal recessive type 4 [recessive?] and Pendred syndrome [recessive?]; severely reduces iodide transport without affecting protein localization to cell membrane).	NA	exonic;nonsynonymous
7	107323983	G	A	1921	3	3	0	1	rs80338849	SLC26A4	NA	Pendred syndrome	9618167	splicing
7	107329499	T	C	1923	1	1	0	1	F335L	S26A4_HUMAN	Yes	(in Pendred syndrome [recessive?] and deafness autosomal recessive type 4 [recessive?]).	NA	exonic;splicing;nonsynonymous
7	107329557	T	C	1922	2	2	0	1	rs111033243	SLC26A4	NA	Pendred syndrome	15355436	exonic;nonsynonymous
7	107335087	A	T	1923	1	1	0	1	I455F	S26A4_HUMAN	Yes	(in deafness autosomal recessive type 4 [recessive?]).	NA	exonic;nonsynonymous
7	107338563	A	G	1922	2	2	0	1	null	SLC26A4	NA	Pendred syndrome	21704276	intronic
7	107341628	T	C	1911	13	11	1	0.0399846	rs55638457	SLC26A4	NA	Pendred syndrome	11317356	exonic;nonsynonymous
7	107355874	C	T	1919	5	5	0	1	rs111033255	SLC26A4	NA	Enlarged vestibular aqueduct	15689455	exonic;nonsynonymous
7	116411990	C	T	1903	21	19	1	0.104457	rs56391007	MET	NA	Colorectal cancer	21970370	exonic;nonsynonymous
7	117119688	A	G	1920	4	4	0	1	rs185028612	CFTR	NA	Cystic fibrosis	11788090	upstream
7	117174349	G	A	1923	1	1	0	1	rs1800079	CFTR	NA	Congenital absence of vas deferens	NA	exonic;nonsynonymous
7	117175303	G	T	1923	1	1	0	1	null	CFTR	NA	Cystic fibrosis	NA	exonic;splicing;nonsynonymous
7	117180174	G	A	1922	2	2	0	1	R297Q	CFTR_HUMAN	Yes	(in cystic fibrosis [recessive?]).	NA	exonic;nonsynonymous
7	117199524	C	T	1923	1	1	0	1	rs1800089	CFTR	NA	Cystic fibrosis	16436643	exonic;nonsynonymous
7	117199709	G	A	1881	43	43	0	1	rs1800095	CFTR	NA	Cystic fibrosis	11788090	exonic;splicing;synonymous
7	117227832	G	T	1922	2	2	0	1	rs113993959	CFTR	NA	Cystic fibrosis	2236053	exonic;stopgain
7	117227860	G	A	1923	1	1	0	1	G551D	CFTR_HUMAN	Yes	(in cystic fibrosis [recessive?]).	NA	exonic;nonsynonymous
7	117230454	G	C	1904	20	20	0	1	rs1800098	CFTR	NA	Congenital absence of vas deferens	1545465	exonic;nonsynonymous
7	117232481	G	A	1920	4	4	0	1	V754M	CFTR_HUMAN	Yes	(in cystic fibrosis [recessive?]).	NA	exonic;nonsynonymous
7	117234999	G	T	1922	2	2	0	1	null	CFTR	NA	Cystic fibrosis	15698946	exonic;nonsynonymous
7	117235056	G	A	1923	1	1	0	1	null	CFTR	NA	Cystic fibrosis	19318035	exonic;nonsynonymous
7	117235090	G	A	1923	1	1	0	1	C866Y	CFTR_HUMAN	Yes	(in cystic fibrosis [recessive?]).	NA	exonic;nonsynonymous
7	117242854	A	G	1920	4	4	0	1	null	CFTR	NA	Cystic fibrosis	9003508	intronic
7	117242865	C	G	1915	9	9	0	1	rs139379077	CFTR	NA	Cystic fibrosis	10875853	intronic
7	117242874	T	C	1921	3	3	0	1	null	CFTR	NA	Congenital absence of vas deferens	NA	intronic
7	117243783	T	C	1922	2	2	0	1	rs142773283	CFTR	NA	Cystic fibrosis	10875853	exonic;nonsynonymous
7	117243784	G	C	1923	1	1	0	1	rs151048781	CFTR	NA	Cystic fibrosis	9254864	exonic;nonsynonymous
7	117251649	T	G	1917	7	7	0	1	F1052V	CFTR_HUMAN	Yes	(in cystic fibrosis [recessive?]).	NA	exonic;nonsynonymous
7	117267559	T	C	1923	1	1	0	1	null	CFTR	NA	Cystic fibrosis	7683952	intronic
7	117267812	T	G	1911	13	13	0	1	rs34911792	CFTR	NA	Cystic fibrosis	7508414	exonic;nonsynonymous
7	117282468	G	A	1923	1	1	0	1	null	CFTR	NA	Cystic fibrosis	17662673	intronic
7	117305631	A	G	1922	2	2	0	1	rs76179227	CFTR	NA	Cystic fibrosis	15858154	intronic
7	138406746	C	A	1913	11	11	0	1	rs150777839	ATP6V0A4	NA	Distal renal tubular acidosis, autosomal recessive	16611712	exonic;nonsynonymous
7	138417791	A	G	1817	107	99	4	0.530243	rs3807153	ATP6V0A4	NA	Distal renal tubular acidosis, autosomal recessive	10973252	exonic;nonsynonymous
7	141301082	T	C	1923	1	1	0	1	null	AGK	NA	Mitochondrial DNA depletion syndrome, myopathic	22277967	splicing
7	143013488	A	T	1923	1	1	0	1	null	CLCN1	NA	Myotonia congenita	9040760	intronic
7	143027910	G	A	1908	16	16	0	1	rs118066140	CLCN1	NA	Myotonia congenita	8112288	exonic;nonsynonymous
7	143039088	C	T	1923	1	1	0	1	null	CLCN1	NA	Myotonia congenita	10508236	exonic;nonsynonymous
7	146825928	G	A	1918	6	6	0	1	rs139180845	CNTNAP2	NA	Intellectual disability	21827697	exonic;splicing;synonymous
7	150649644	C	T	1923	1	1	0	1	null	KCNH2	NA	Long QT syndrome	19716085	exonic;nonsynonymous
7	150654468	G	A	1921	3	3	0	1	P347S	KCNH2_HUMAN	Yes	(in long QT syndrome type 2).	NA	exonic;nonsynonymous
7	150671807	C	T	1921	3	3	0	1	null	KCNH2	NA	Long QT syndrome	15840476	exonic;nonsynonymous
7	155595838	A	G	1923	1	1	0	1	L382P	SHH_HUMAN	Yes	(in holoprosencephaly type 3 [dominant?]).	NA	exonic;nonsynonymous
8	1719594	A	G	1921	3	3	0	1	rs142269885	CLN8	NA	Neuronal ceroid lipofuscinosis, late infantile	21990111	exonic;nonsynonymous
8	11405576	G	A	1906	18	18	0	1	rs55758736	BLK	NA	Diabetes, MODY	19667185	exonic;nonsynonymous
8	11565948	C	T	1911	13	13	0	1	null	GATA4	NA	Ventricular septal defect	22101736	exonic;nonsynonymous
8	11566308	C	T	1787	137	137	0	0.0116071	null	GATA4	NA	Congenital heart defects	17643447	exonic;nonsynonymous
8	11614483	C	T	1918	6	6	0	1	rs115372595	GATA4	NA	Congenital heart defects	17643447	exonic;nonsynonymous
8	11615875	C	A	1923	1	1	0	1	rs115099192	GATA4	NA	Congenital heart defects	18672102	exonic;nonsynonymous
8	11615928	G	A	1923	1	1	0	1	rs56208331	GATA4	NA	Congenital heart defects	18055909	exonic;nonsynonymous
8	11615980	C	T	1923	1	1	0	1	null	GATA4	NA	Congenital heart defects	18672102	exonic;nonsynonymous
8	16012594	G	A	1906	18	18	0	1	rs41341748	MSR1	NA	Prostate cancer	12244320	exonic;stopgain
8	19796711	G	C	1920	4	4	0	1	null	LPL	NA	Lipoprotein lipase deficiency	9017514	UTR5
8	19811733	G	A	1923	1	1	0	1	G215E	LIPL_HUMAN	Yes	(in lipoprotein lipase deficiency [recessive?]; loss of activity).	NA	exonic;nonsynonymous
8	30954294	C	T	1921	3	3	0	1	rs148286708	WRN	NA	Werner syndrome	16786514	exonic;nonsynonymous
8	38282064	A	G	1922	2	2	0	1	rs121909633	FGFR1	NA	Non-syndromic trigonocephaly	11173846	exonic;nonsynonymous
8	38287208	T	C	1923	1	1	0	1	null	FGFR1	NA	Hypogonadotropic hypogonadism, idiopathic	19820032	exonic;nonsynonymous
8	41519303	G	A	1911	13	13	0	1	null	ank1tv10	NA	Spherocytosis	8640229	intronic
8	41526116	G	A	1917	7	7	0	1	rs185434561	ANK1	NA	Spherocytosis	8640229	intronic
8	41655209	C	T	1851	73	69	2	0.643044	rs183894680	ANK1	NA	Spherocytosis	9887280	intronic
8	42995758	G	A	1796	128	128	0	0.0175605	null	HGSNAT	NA	Mucopolysaccharidosis IIIC	17033958	splicing
8	43002207	G	A	1923	1	1	0	1	null	HGSNAT	NA	Mucopolysaccharidosis IIIC	17033958	splicing
8	43054647	G	A	1912	12	12	0	1	rs112029032	HGSNAT	NA	Mucopolysaccharidosis IIIC	17033958	exonic;nonsynonymous
8	55537560	C	T	1902	22	22	0	1	rs77775126	RP1	NA	Retinitis pigmentosa, autosomal recessive	15863674	exonic;nonsynonymous
8	65509264	G	A	1922	2	2	0	1	rs116171274	CYP7B1	NA	Spastic paraplegia	19439420	exonic;nonsynonymous
8	68396032	G	A	1923	1	1	0	1	rs114402678	CPA6	NA	Temporal lobe epilepsy	21922598	exonic;nonsynonymous
8	68396042	C	T	1919	5	5	0	1	rs61738009	CPA6	NA	Temporal lobe epilepsy	21922598	exonic;nonsynonymous
8	72127864	G	A	1922	2	2	0	1	rs139717960	EYA1	NA	Branchio-oto-renal syndrome	15146463	exonic;nonsynonymous
8	77895746	C	T	1923	1	1	0	1	rs61752127	PEX2	NA	Peroxisome biogenesis disorder	14630978	exonic;stopgain
8	90983460	G	A	1917	7	7	0	1	rs34767364	NBN	NA	Colorectal cancer	15185344	exonic;nonsynonymous
8	90983475	C	A	1922	2	2	0	1	rs61754796	NBN	NA	Acute lymphoblastic leukaemia	16810201	exonic;nonsynonymous
8	90990521	T	C	1921	3	3	0	1	rs61754966	NBN	NA	Acute lymphoblastic leukaemia	11325820	exonic;nonsynonymous
8	90993640	C	T	1919	5	5	0	1	rs61753720	NBN	NA	Acute lymphoblastic leukaemia	16810201	exonic;nonsynonymous
8	94784818	G	C	1923	1	1	0	1	null	TMEM67	NA	Meckel syndrome	19574260	exonic;splicing;nonsynonymous
8	94792887	G	A	1894	30	28	1	0.205165	rs35793208	TMEM67	NA	Meckel syndrome	19574260	exonic;nonsynonymous
8	94793190	A	T	1923	1	1	0	1	rs111619594	TMEM67	NA	Bardet-Biedl syndrome	18327255	exonic;nonsynonymous
8	94793953	T	C	1923	1	1	0	1	null	TMEM67	NA	Meckel syndrome	17397051	exonic;nonsynonymous
8	94798471	C	G	1918	6	6	0	1	rs35765535	TMEM67	NA	Meckel syndrome	19574260	exonic;nonsynonymous
8	94811986	G	A	1919	5	5	0	1	rs115563233	TMEM67	NA	Joubert syndrome	17160906	exonic;splicing;synonymous
8	100832259	A	G	1908	16	16	0	1	N2993S	VP13B_HUMAN	Yes	(in Cohen syndrome [recessive?]; dbSNP:rs28940272).	NA	exonic;nonsynonymous
8	100880540	C	T	1923	1	1	0	1	null	VPS13B	NA	Cohen syndrome	15154116	exonic;stopgain
8	103231055	A	C	1923	1	1	0	1	I224S	RIR2B_HUMAN	Yes	(in encephalomyopathic mitochondrial depletion syndrome with renal tubulopathy; without tubulopathy).	NA	exonic;nonsynonymous
8	103664582	A	G	1922	2	2	0	1	null	KLF10	NA	Cardiomyopathy, hypertrophic	22234868	exonic;nonsynonymous
8	104343757	C	T	1923	1	1	0	1	null	FZD6	NA	Neural tube defects	22045688	UTR3
8	105440273	T	C	1923	1	1	0	1	null	DPYS	NA	Dihydropyramidinase deficiency	20362666	exonic;nonsynonymous
8	106431420	A	G	1907	17	17	0	1	rs121908601	ZFPM2	NA	Tetralogy of Fallot	14517948	exonic;nonsynonymous
8	133146616	G	A	1918	6	6	0	1	rs74582884	KCNQ3	NA	Epilepsy, rolandic without neonatal seizures	18625963	exonic;nonsynonymous
8	133900662	G	T	1922	2	2	0	1	rs2229843	TG	NA	Goitre, simple	8094490	exonic;nonsynonymous
8	145009036	C	T	1883	41	41	0	1	rs138924815	PLEC	NA	Muscular dystrophy with epidermolysis bullosa	20016501	exonic;nonsynonymous
8	145700381	C	G	1912	12	12	0	1	rs144830740	FOXH1	NA	Congenital heart defects	18538293	exonic;nonsynonymous
9	2718078	C	A	1923	1	1	0	1	null	KCNV2	NA	Cone dystrophy, autosomal recessive	22264887	exonic;stopgain
9	6588403	C	T	1918	6	6	0	1	rs151268759	GLDC	NA	Hyperglycinaemia, non-ketotic	16450403	exonic;nonsynonymous
9	13136783	T	C	1917	7	7	0	1	null	MPDZ	NA	Leber congenital amaurosis	21862650	exonic;nonsynonymous
9	19786020	A	C	1917	7	7	0	1	rs41313971	SLC24A2	NA	Retinal disease	12037007	exonic;nonsynonymous
9	21970985	C	G	1923	1	1	0	1	rs146179135	CDKN2A	NA	Melanoma	10398427	exonic;nonsynonymous
9	21971006	C	T	1917	7	7	0	1	A118T	CD2A1_HUMAN	Yes	(in cutaneous malignant melanoma type 2).	NA	exonic;nonsynonymous
9	21971105	C	T	1920	4	4	0	1	null	CDKN2A	NA	Melanoma	8710906	exonic;nonsynonymous
9	21973573	G	T	1919	5	5	0	1	null	CDKN2A	NA	Melanoma	15761864	intronic
9	21974640	C	G	1916	8	8	0	1	rs45456595	cdkn2ai3	NA	Melanoma	19320745	exonic;nonsynonymous
9	34649029	G	T	1923	1	1	0	1	rs111033773	GALT	NA	Galactosaemia	1427861	exonic;nonsynonymous
9	35657889	G	A	1923	1	1	0	1	null	RMRP	NA	Cartilage-Hair hypoplasia	12107819	ncRNA_exonic
9	36217445	C	T	1923	1	1	0	1	rs121908627	GNE	NA	Inclusion body myopathy	11528398	exonic;nonsynonymous
9	36227394	C	A	1923	1	1	0	1	null	GNE	NA	Myopathy, distal, with rimmed vacuoles	12473753	exonic;nonsynonymous
9	37426542	C	T	1923	1	1	0	1	rs119490108	GRHPR	NA	Hyperoxaluria II	11030416	exonic;stopgain
9	75406910	C	T	1923	1	1	0	1	null	TMC1	NA	DFNB7/B11 deafness	19187973	exonic;nonsynonymous
9	94800624	C	G	1921	3	3	0	1	G387A	SPTC1_HUMAN	Yes	(in hereditary sensory and autonomic neuropathy type 1 [dominant?]).	NA	exonic;nonsynonymous
9	99015193	C	G	1923	1	1	0	1	rs149607031	HSD17B3	NA	Pseudohermaphroditism, male	8075637	splicing
9	99017146	T	A	1923	1	1	0	1	null	HSD17B3	NA	17 beta-hydroxysteroid dehydrogenase 3 deficiency	10599740	intronic
9	101594229	G	A	1920	4	4	0	1	rs145236923	GALNT12	NA	Colon cancer	19617566	exonic;nonsynonymous
9	101891173	A	G	1923	1	1	0	1	null	TGFBR1	NA	Multiple self-healing squamous epithelioma	21358634	exonic;nonsynonymous
9	103046765	G	C	1919	5	5	0	1	rs147452898	INVS	NA	Nephronophthisis 2	17855640	exonic;nonsynonymous
9	104189856	C	G	1922	2	2	0	1	A150P	ALDOB_HUMAN	Yes	(in hereditary fructose intolerance [recessive?]; frequent mutation; dbSNP:rs1800546).	NA	exonic;nonsynonymous
9	104198194	C	T	1897	27	25	1	0.168884	rs185972191	ALDOB	NA	Fructose intolerance	20882353	upstream
9	107554263	C	T	1917	7	7	0	1	null	ABCA1	NA	Scott syndrome	15790791	exonic;nonsynonymous
9	107556776	T	G	1923	1	1	0	1	N1800H	ABCA1_HUMAN	Yes	(in high density lipoprotein deficiency type 1 [recessive?]).	NA	exonic;nonsynonymous
9	107576738	C	T	1923	1	1	0	1	null	ABCA1	NA	Reduced plasma HDL cholesterol	20880529	exonic;nonsynonymous
9	107578515	C	A	1923	1	1	0	1	null	ABCA1	NA	Reduced plasma HDL cholesterol	18523221	exonic;nonsynonymous
9	107620797	A	G	1921	3	1	1	0.00156006	null	ABCA1	NA	HDL deficiency	19133158	intronic
9	107646756	G	A	1921	3	3	0	1	P85L	ABCA1_HUMAN	Yes	(in high density lipoprotein deficiency type 2 [dominant?]; Alabama).	NA	exonic;nonsynonymous
9	108366499	G	A	1907	17	17	0	1	rs34006675	FKTN	NA	Walker-Warburg syndrome	18177472	exonic;nonsynonymous
9	130578230	G	A	1919	5	5	0	1	S615L	EGLN_HUMAN	Yes	(in hereditary hemorrhagic telangiectasia type 1 [dominant?]).	NA	exonic;nonsynonymous
9	130616621	G	A	1881	43	41	1	0.381202	rs35400405	ENG	NA	Haemorrhagic telangiectasia 1	11343967	exonic;nonsynonymous
9	131114938	A	G	1923	1	1	0	1	Q300R	S27A4_HUMAN	Yes	(in ichthyosis prematurity syndrome).	NA	exonic;nonsynonymous
9	131298693	G	A	1923	1	1	0	1	R569H	GLE1_HUMAN	Yes	(in lethal congenital contracture syndrome type 1 [recessive?]).	NA	exonic;nonsynonymous
9	134394834	C	G	1921	3	3	0	1	rs150367385	POMT1	NA	Walker-Warburg syndrome	15637732	exonic;nonsynonymous
9	135140020	A	G	1907	17	17	0	1	rs151117904	SETX	NA	Amyotrophic lateral sclerosis	21190393	exonic;nonsynonymous
9	135201718	A	G	1923	1	1	0	1	F1756S	SETX_HUMAN	Yes	(in spinocerebellar ataxia autosomal recessive type 1 [recessive?]; heterozygous in a British family).	NA	exonic;nonsynonymous
9	135202325	A	C	1913	11	11	0	1	rs112089123	SETX	NA	Amyotrophic lateral sclerosis	21190393	exonic;nonsynonymous
9	135204010	T	C	1902	22	22	0	1	rs61742937	SETX	NA	Ataxia-ocular apraxia 2	17159128	exonic;nonsynonymous
9	136302010	C	T	1919	5	5	0	1	rs36220240	ADAMTS13	NA	Thrombotic thrombocytopaenic purpura	12753286	exonic;nonsynonymous
9	139399320	C	T	1923	1	1	0	1	rs76371972	NOTCH1	NA	Aortic valve disease	18593716	exonic;nonsynonymous
9	139400320	G	A	1919	5	5	0	1	rs183156491	NOTCH1	NA	Aortic valve disease	17662764	exonic;nonsynonymous
9	139409089	C	T	1923	1	1	0	1	rs79782048	NOTCH1	NA	Aortic valve disease	18593716	exonic;nonsynonymous
9	140127856	G	A	1918	6	6	0	1	rs121918239	SLC34A3	NA	Hereditary hypophosphataemic rickets with hypercalciuria	16849419	exonic;splicing;synonymous
9	140349707	C	T	1923	1	1	0	1	rs142726563	NELF	NA	Kallmann syndrome	21300340	exonic;nonsynonymous
10	13166053	A	T	1923	1	1	0	1	rs142812715	OPTN	NA	Amyotrophic lateral sclerosis	21613650	exonic;nonsynonymous
10	13178766	G	A	1923	1	1	0	1	rs75654767	OPTN	NA	Glaucoma 1, open angle	11834836	exonic;nonsynonymous
10	13325784	C	T	1907	17	17	0	1	R245Q	PAHX_HUMAN	Yes	(in Refsum disease [recessive?]; partial loss of activity).	NA	exonic;nonsynonymous
10	13337608	T	C	1923	1	1	0	1	null	PHYH	NA	Refsum disease	9326939	splicing
10	14977469	C	T	1880	44	42	1	0.395348	rs41297018	DCLRE1C	NA	Immunodeficiency, severe combined	18223550	exonic;nonsynonymous
10	17152923	G	A	1923	1	1	0	1	null	CUBN	NA	Megaloblastic anaemia	17668238	exonic;nonsynonymous
10	18789874	C	T	1922	2	2	0	1	rs150528041	CACNB2	NA	Brugada syndrome	20817017	exonic;nonsynonymous
10	18803444	G	T	1923	1	1	0	1	null	cacnb2i5	NA	Brugada syndrome	20817017	exonic;nonsynonymous
10	18827163	C	T	1921	3	3	0	1	rs145638628	CACNB2	NA	Brugada syndrome	20817017	exonic;nonsynonymous
10	18828181	C	T	1921	3	3	0	1	rs143326262	CACNB2	NA	Brugada syndrome	20817017	exonic;nonsynonymous
10	18828446	C	A	1923	1	1	0	1	rs144182966	CACNB2	NA	Brugada syndrome	20817017	exonic;nonsynonymous
10	21157673	C	T	1921	3	3	0	1	rs137973321	NEBL	NA	Cardiomyopathy, dilated	20951326	exonic;nonsynonymous
10	21178852	C	G	1908	16	16	0	1	rs41277374	NEBL	NA	Cardiomyopathy, dilated	20951326	exonic;nonsynonymous
10	31608164	A	G	1923	1	1	0	1	null	ZEB1	NA	Posterior polymorphous corneal dystrophy	19997581	exonic;nonsynonymous
10	31810782	A	C	1916	8	8	0	1	rs118020901	ZEB1	NA	Corneal dystrophy, Fuchs late-onset	20036349	exonic;nonsynonymous
10	43595999	C	A	1918	6	6	0	1	rs145633958	RET	NA	Hirschsprung disease	10790203	exonic;nonsynonymous
10	43607553	C	T	1922	2	2	0	1	null	RET	NA	Thyroid carcinoma, medullary	20103606	exonic;nonsynonymous
10	43607555	G	A	1923	1	1	0	1	null	RET	NA	Thyroid carcinoma, medullary	20103606	exonic;nonsynonymous
10	43609994	C	T	1922	2	2	0	1	rs148935214	RET	NA	Elevated basal serum calcitonin	15320968	exonic;nonsynonymous
10	43615592	T	G	1923	1	1	0	1	S891A	RET_HUMAN	Yes	(in medullary thyroid carcinoma [dominant?]; familial form).	NA	exonic;nonsynonymous
10	50863175	G	A	1922	2	2	0	1	null	CHAT	NA	Congenital myasthenic syndrome with episodic apnea	19520274	exonic;nonsynonymous
10	69881254	A	G	1920	4	4	0	1	null	MYPN	NA	Cardiomyopathy, dilated / hypertrophic	22286171	exonic;nonsynonymous
10	69959174	C	T	1923	1	1	0	1	rs71534278	MYPN	NA	Cardiomyopathy, dilated	18006477	exonic;nonsynonymous
10	70645296	C	T	1899	25	23	1	0.1461	rs41278530	STOX1	NA	Preeclampsia	15806103	exonic;nonsynonymous
10	71075518	A	G	1917	7	7	0	1	null	hk1e	NA	Hemolysis, mild chronic	19608687	intronic
10	72360130	G	A	1923	1	1	0	1	null	PRF1	NA	Anaplastic large cell lymphoma	17477373	exonic;nonsynonymous
10	73377112	G	A	1907	17	17	0	1	rs143282422	CDH23	NA	Usher syndrome 1d	15660226	exonic;nonsynonymous
10	73472494	A	G	1918	6	6	0	1	rs41281310	CDH23	NA	Usher syndrome 1d	18429043	exonic;nonsynonymous
10	73550880	G	A	1922	2	2	0	1	null	CDH23	NA	Usher syndrome 1d	11857743	intronic
10	73892817	T	C	1918	6	6	0	1	rs146370051	ASCC1	NA	Barrett oesophagus/oesophageal adenocarcinoma	21791690	exonic;nonsynonymous
10	75842257	C	A	1923	1	1	0	1	L277M	VINC_HUMAN	Yes	(in cardiomyopathy dilated type 1W).	NA	exonic;nonsynonymous
10	75877895	C	T	1923	1	1	0	1	null	VCL	NA	Cardiomyopathy, dilated	20474083	exonic;nonsynonymous
10	86012708	C	A	1920	4	4	0	1	rs150808273	RGR	NA	Retinitis pigmentosa	10581022	exonic;nonsynonymous
10	89623056	C	T	1923	1	1	0	1	null	PTEN	NA	Cowden disease	21194675	UTR5
10	89653806	T	C	1923	1	1	0	1	null	PTEN	NA	Proteus-like syndrome	11476841	exonic;nonsynonymous
10	90771767	G	A	1920	4	4	0	1	rs56006128	FAS	NA	Autoimmune lymphoproliferative syndrome	16537120	exonic;nonsynonymous
10	92675322	G	A	1917	7	7	0	1	rs35550482	ANKRD1	NA	Cardiomyopathy, dilated	19525294	exonic;nonsynonymous
10	92678728	G	A	1922	2	2	0	1	T116M	ANKR1_HUMAN	Yes	(in total anomalous pulmonary venous return).	NA	exonic;splicing;nonsynonymous
10	99359925	G	T	1921	3	3	0	1	rs185803104	HOGA1	NA	Hyperoxaluria, primary type III	20797690	intronic
10	101829514	C	T	1841	83	79	2	0.695543	G178D	CBPN_HUMAN	Yes	(in carboxypeptidase N deficiency [recessive?]).	NA	exonic;nonsynonymous
10	112544125	C	T	1916	8	8	0	1	null	RBM20	NA	Cardiomyopathy, dilated	22004663	exonic;nonsynonymous
10	112581039	G	A	1918	6	6	0	1	null	RBM20	NA	Cardiomyopathy, dilated	22004663	exonic;nonsynonymous
10	122626269	C	T	1922	2	2	0	1	null	WDR11	NA	Hypogonadotropic hypogonadism	20887964	exonic;nonsynonymous
10	122630690	G	A	1923	1	1	0	1	null	WDR11	NA	Hypogonadotropic hypogonadism	20887964	exonic;nonsynonymous
10	124800121	C	T	1918	6	6	0	1	rs58639322	ACADSB	NA	2-Methylbutyryl-CoA dehydrogenase deficiency	15615815	exonic;nonsynonymous
11	2606494	A	G	1923	1	1	0	1	rs12720458	KCNQ1	NA	Long QT syndrome	15840476	exonic;nonsynonymous
11	2608864	A	G	1923	1	1	0	1	null	KCNQ1	NA	Long QT syndrome	19716085	exonic;nonsynonymous
11	2906803	C	T	1908	16	16	0	1	rs188494894	CDKN1C	NA	Beckwith-Wiedemann syndrome	10424811	UTR5
11	2906804	C	T	1837	87	87	0	0.254799	rs143992355	CDKN1C	NA	Beckwith-Wiedemann syndrome	10424811	UTR5
11	5246732	A	G	1921	3	3	0	1	rs34029390	HBB	NA	Thalassaemia beta	1536956	UTR3
11	5254327	G	A	1923	1	1	0	1	rs35769679	HBD	NA	Haemoglobin variant	NA	intronic
11	5255582	C	A	1919	5	5	0	1	rs35152987	HBD	NA	Thalassaemia delta	3401592	exonic;nonsynonymous
11	5255650	G	A	1923	1	1	0	1	rs35406175	HBD	NA	Haemoglobin variant	8364213	exonic;nonsynonymous
11	5255768	A	G	1923	1	1	0	1	rs34796568	HBD	NA	Thalassaemia delta	9143928	UTR5
11	6412635	G	A	1923	1	1	0	1	null	SMPD1	NA	Niemann-Pick disease	22367733	exonic;nonsynonymous
11	6413052	G	C	1923	1	1	0	1	null	SMPD1	NA	Niemann-Pick disease	20386867	exonic;nonsynonymous
11	6414910	C	T	1923	1	1	0	1	rs120074127	SMPD1	NA	Niemann-Pick disease	8680412	exonic;stopgain
11	6415245	C	T	1916	8	8	0	1	rs141641266	SMPD1	NA	Niemann-Pick disease	12369017	exonic;nonsynonymous
11	6637981	C	T	1923	1	1	0	1	null	TPP1	NA	Neuronal ceroid lipofuscinosis, late infantile	21990111	exonic;nonsynonymous
11	6638385	C	G	1921	3	3	0	1	rs56144125	TPP1	NA	Neuronal ceroid lipofuscinosis, late infantile	9295267	splicing
11	17417496	G	A	1917	7	7	0	1	rs1800853	ABCC8	NA	Hypoglycaemia, persistent hyperinsulinaemic	16429405	intronic
11	17470143	A	G	1923	1	1	0	1	C418R	ABCC8_HUMAN	Yes	(in familial hyperinsulinemic hypoglycemia type 1).	NA	exonic;nonsynonymous
11	17531093	G	C	1921	3	3	0	1	rs41282932	ush1cpst	NA	Deafness, non-syndromic	12136232	exonic;nonsynonymous
11	18047154	C	T	1922	2	2	0	1	rs145855109	TPH1	NA	Attention deficit hyperactivity disorder	20921119	exonic;nonsynonymous
11	18303533	G	A	1856	68	62	3	0.110713	T1098I	HPS5_HUMAN	Yes	(in Hermansky-Pudlak syndrome type 5 [recessive?]).	NA	exonic;nonsynonymous
11	19213986	A	G	1918	6	6	0	1	rs45550635	CSRP3	NA	Cardiomyopathy, dilated	12507422	exonic;nonsynonymous
11	22257752	G	T	1923	1	1	0	1	rs137854523	ANO5	NA	Muscular dystrophy, limb girdle 2L	20096397	exonic;nonsynonymous
11	22294441	C	G	1920	4	4	0	1	null	ANO5	NA	Muscular dystrophy	22402862	exonic;nonsynonymous
11	32450067	G	A	1922	2	2	0	1	rs2234584	WT1	NA	Wilms tumour	9108089	exonic;nonsynonymous
11	34477754	G	T	1919	5	5	0	1	rs147912187	CAT	NA	Acatalasaemia	11197178	intronic
11	34482910	G	A	1922	2	2	0	1	null	CAT	NA	Acatalasaemia	7492289	exonic;nonsynonymous
11	36596083	G	A	1923	1	1	0	1	R410Q	RAG1_HUMAN	Yes	(in Omenn syndrome/severe combined immunodeficiency; autosomal recessive T cell-negative; B-cell- negative; NK cell-positive [recessive?])B(-)NK(+) SCID; atypical).	NA	exonic;nonsynonymous
11	36596200	G	A	1892	32	32	0	1	rs4151031	RAG1	NA	Omenn syndrome	16960852	exonic;nonsynonymous
11	36614215	T	C	1921	3	3	0	1	rs145614809	RAG2	NA	Omenn syndrome	16960852	exonic;nonsynonymous
11	46747447	G	A	1921	3	3	0	1	E200K	THRB_HUMAN	Yes	(in factor II deficiency; prothrombin type 3).	NA	exonic;nonsynonymous
11	47353695	C	T	1923	1	1	0	1	null	MYBPC3	NA	Cardiomyopathy, hypertrophic	18403758	exonic;nonsynonymous
11	47356628	G	C	1922	2	2	0	1	null	MYBPC3	NA	Cardiomyopathy, hypertrophic	18957093	exonic;nonsynonymous
11	47357479	C	T	1919	5	5	0	1	rs35078470	MYBPC3	NA	Cardiomyopathy, hypertrophic	10521296	exonic;nonsynonymous
11	47358992	G	A	1923	1	1	0	1	null	MYBPC3	NA	Cardiomyopathy, hypertrophic	16199542	exonic;nonsynonymous
11	47359047	C	T	1921	3	3	0	1	A832T	MYPC3_HUMAN	Yes	(in cardiomyopathy familial hypertrophic type 4; pathogenicity is uncertain).	NA	exonic;nonsynonymous
11	47367887	C	T	1923	1	1	0	1	null	MYBPC3	NA	Cardiomyopathy, dilated	21750094	exonic;nonsynonymous
11	47374186	C	G	1922	2	2	0	1	G5R	MYPC3_HUMAN	Yes	(in cardiomyopathy familial hypertrophic type 4).	NA	exonic;nonsynonymous
11	47469631	G	T	1922	2	2	0	1	rs104894299	RAPSN	NA	Congenital myasthenic syndrome	11791205	exonic;nonsynonymous
11	47470715	G	C	1923	1	1	0	1	null	RAPSN	NA	Congenital myasthenic syndrome	12651869	UTR5
11	57365118	C	G	1923	1	1	0	1	null	SERPING1	NA	Angioneurotic oedema	8755917	UTR5
11	59623378	C	A	1724	200	188	6	0.164426	rs34324219	TCN1	NA	Transcobalamin I deficiency	NA	exonic;nonsynonymous
11	59861473	G	T	1923	1	1	0	1	rs138180929	MS4A2	NA	Atopy	10427478	exonic;stopgain
11	61161436	C	T	1923	1	1	0	1	null	TMEM216	NA	Joubert syndrome 2	22282472	exonic;nonsynonymous
11	61161437	G	T	1922	2	2	0	1	R12L	TM216_HUMAN	Yes	(in Joubert syndrome type 2).	NA	exonic;nonsynonymous
11	61724453	C	A	1922	2	2	0	1	rs74653691	BEST1	NA	Best macular dystrophy	10798642	exonic;nonsynonymous
11	61730295	G	A	1923	1	1	0	1	rs147192139	BEST1	NA	Adult vitelliform macular dystrophy	21273940	exonic;nonsynonymous
11	61730325	C	T	1923	1	1	0	1	rs148060787	BEST1	NA	Macular degeneration, age related	11713080	exonic;nonsynonymous
11	64518016	G	A	1920	4	4	0	1	rs113806080	PYGM	NA	McArdle disease	NA	exonic;nonsynonymous
11	66293652	T	G	1916	8	8	0	1	M390R	BBS1_HUMAN	Yes	(in Bardet-Biedl syndrome type 1 [recessive?]).	NA	exonic;nonsynonymous
11	67250676	G	A	1917	7	7	0	1	rs145047094	AIP	NA	Pituitary adenoma	17244780	exonic;nonsynonymous
11	67258278	C	T	1921	3	3	0	1	rs139407567	AIP	NA	Pituitary adenoma	18381572	exonic;synonymous
11	67799622	C	T	1917	7	7	0	1	rs150278938	NDUFS8	NA	Complex I deficiency	20818383	exonic;nonsynonymous
11	67810830	G	A	1923	1	1	0	1	null	TCIRG1	NA	Osteopetrosis, autosomal recessive	15300850	UTR5
11	68191036	G	A	1916	8	8	0	1	rs61889560	LRP5	NA	Osteoporosis, primary	15824851	exonic;nonsynonymous
11	68193464	T	A	1923	1	1	0	1	null	LRP5	NA	Osteoporosis, primary	22487062	exonic;nonsynonymous
11	68575021	G	A	1923	1	1	0	1	R123C	CPT1A_HUMAN	Yes	(in carnitine palmitoyltransferase 1A deficiency [recessive?]).	NA	exonic;nonsynonymous
11	68707139	T	G	1921	3	3	0	1	rs147674615	IGHMBP2	NA	Spinal muscular atrophy with respiratory distress 1	14681881	exonic;nonsynonymous
11	71146886	C	G	1903	21	21	0	1	rs138659167	DHCR7	NA	Smith-Lemli-Opitz syndrome	9653161	splicing
11	71152447	C	T	1923	1	1	0	1	rs11555217	DHCR7	NA	Smith-Lemli-Opitz syndrome	9653161	exonic;stopgain
11	71906793	T	C	1916	8	8	0	1	rs144637717	FOLR1	NA	Folate receptor deficiency	21937992	splicing
11	74168361	C	T	1913	11	11	0	1	R83H	KCNE3_HUMAN	Yes	(in periodic paralysis hypokalemic [dominant?] and thyrotoxic periodic paralysis type 1; alters voltage dependence; lowers current and diminishes open probability in KCNC4/ KCNE3 channel; lowers current in KCNQ1/ KCNE3 channel; dbSNP:rs17215437).	NA	exonic;nonsynonymous
11	76869378	G	A	1918	6	6	0	1	rs41298135	MYO7A	NA	Usher syndrome 1b	8900236	exonic;nonsynonymous
11	76870496	G	A	1921	3	3	0	1	rs45629132	MYO7A	NA	Usher syndrome 1	16470552	exonic;nonsynonymous
11	76895733	G	T	1923	1	1	0	1	null	MYO7A	NA	Usher syndrome 1	21436283	exonic;nonsynonymous
11	76901153	G	A	1923	1	1	0	1	R1240Q	MYO7A_HUMAN	Yes	(in Usher syndrome type 1B).	NA	exonic;nonsynonymous
11	76914163	C	T	1921	3	3	0	1	R1743W	MYO7A_HUMAN	Yes	(in Usher syndrome type 1B).	NA	exonic;nonsynonymous
11	77817941	G	A	1921	3	3	0	1	null	ALG8	NA	Congenital disorder of glycosylation 1h	19688606	exonic;stopgain
11	77823819	G	T	1923	1	1	0	1	null	ALG8	NA	Congenital disorder of glycosylation 1h	19862844	intronic
11	86666031	G	A	1880	44	44	0	1	rs61735304	FZD4	NA	Exudative vitreoretinopathy	15733276	exonic;nonsynonymous
11	88070745	A	C	1923	1	1	0	1	null	CTSC	NA	Papillon-Lefevre syndrome	11886537	exonic;stopgain
11	88911575	C	T	1923	1	1	0	1	P152S	TYRO_HUMAN	Yes	(in albinism oculocutaneous type 1B [recessive?]).	NA	exonic;nonsynonymous
11	88911770	C	T	1923	1	1	0	1	R217W	TYRO_HUMAN	Yes	(in albinism oculocutaneous type 1A [recessive?]).	NA	exonic;nonsynonymous
11	88911771	G	A	1922	2	2	0	1	R217Q	TYRO_HUMAN	Yes	(in albinism oculocutaneous type 1A [recessive?]).	NA	exonic;nonsynonymous
11	88960984	T	A	1923	1	1	0	1	rs61754381	TYR	NA	Albinism, oculocutaneous 1	8217557	intronic
11	89017973	C	T	1909	15	15	0	1	P406L	TYRO_HUMAN	Yes	(in albinism oculocutaneous type 1A [recessive?] and albinism oculocutaneous type 1B [recessive?]).	NA	exonic;nonsynonymous
11	89018126	A	G	1921	3	3	0	1	rs61754398	TYR	NA	Albinism, oculocutaneous 1	8217557	intronic
11	92715054	G	A	1923	1	1	0	1	null	MTNR1B	NA	Diabetes, type 2	22286214	exonic;nonsynonymous
11	94203741	G	A	1922	2	2	0	1	null	MRE11A	NA	Ovarian cancer	14684699	exonic;nonsynonymous
11	108119654	T	G	1921	3	3	0	1	null	ATM	NA	Breast cancer, susceptibility to	10677309	intronic
11	108119823	T	C	1917	7	7	0	1	rs56128736	ATM	NA	Ocular telangiectasia	12882767	exonic;nonsynonymous
11	108122700	T	C	1922	2	2	0	1	rs2235006	ATM	NA	Breast cancer, susceptibility to	11996792	exonic;nonsynonymous
11	108158399	A	G	1923	1	1	0	1	rs147600485	ATM	NA	Breast cancer, susceptibility to	12935922	exonic;nonsynonymous
11	108170506	A	C	1921	3	3	0	1	rs1800059	ATM	NA	Ataxia telangiectasia	9463314	exonic;nonsynonymous
11	108202772	G	T	1913	11	11	0	1	rs112775908	ATM	NA	Breast cancer, susceptibility to	11505391	intronic
11	108236095	A	G	1921	3	3	0	1	null	ATM	NA	Breast cancer, susceptibility to	11505391	exonic;nonsynonymous
11	111779556	C	T	1920	4	4	0	1	rs150516929	CRYAB	NA	Cardiomyopathy, dilated	16793013	exonic;nonsynonymous
11	116692293	C	A	1908	16	16	0	1	rs12721043	APOA4	NA	Hyperlipidaemia	8956036	exonic;nonsynonymous
11	116701353	C	T	1923	1	1	0	1	rs76353203	APOC3	NA	Apolipoprotein C3 deficiency with apparent cardioprotection	19074352	exonic;splicing;stopgain
11	116701560	G	A	1923	1	1	0	1	rs147210663	APOC3	NA	Apolipoprotein C3 variant	11060345	exonic;nonsynonymous
11	116707739	A	C	1922	2	2	0	1	null	APOA1	NA	Hypoalphalipoproteinaemia	20884842	exonic;nonsynonymous
11	118211162	G	A	1923	1	1	0	1	rs111033580	CD3D	NA	Immunodeficiency, severe combined	14602880	exonic;stopgain
11	118959361	C	T	1923	1	1	0	1	T35M	HEM3_HUMAN	Yes	(in acute intermittent porphyria [dominant?]).	NA	exonic;nonsynonymous
11	118963869	G	A	1922	2	2	0	1	rs150428209	HMBS	NA	Porphyria, acute intermittent	11591889	exonic;nonsynonymous
11	121000636	A	G	1921	3	3	0	1	rs146175803	TECTA	NA	Deafness, autosomal dominant	21520338	exonic;nonsynonymous
11	121016463	C	T	1923	1	1	0	1	rs138768918	TECTA	NA	Deafness, autosomal dominant	21520338	exonic;nonsynonymous
11	124519650	C	A	1922	2	2	0	1	null	SIAE	NA	Autoimmune disease	20555325	exonic;nonsynonymous
11	128709126	A	G	1896	28	28	0	1	M357T	IRK1_HUMAN	Yes	(in Bartter syndrome type 2 [recessive?]; dbSNP:rs59172778).	NA	exonic;nonsynonymous
11	134128923	C	G	1872	52	52	0	1	rs113488591	ACAD8	NA	Isobutyryl-CoA dehydrogenase deficiency	17304052	exonic;nonsynonymous
12	6085324	G	A	1923	1	1	0	1	rs61751286	VWF	NA	Von Willebrand disease 1	16985174	exonic;nonsynonymous
12	6101204	T	A	1923	1	1	0	1	rs61750621	VWF	NA	Von Willebrand disease 1	17190853	intronic
12	6125910	G	A	1918	6	6	0	1	rs61750601	VWF	NA	Von Willebrand disease 3	11057846	intronic
12	6127833	T	C	1919	5	5	0	1	rs1800386	VWF	NA	Von Willebrand disease 1	12649144	exonic;nonsynonymous
12	6128787	G	A	1922	2	2	0	1	null	VWF	NA	Von Willebrand disease 1	8486782	exonic;nonsynonymous
12	6143978	C	T	1919	5	5	0	1	rs41276738	VWF	NA	Von Willebrand, Normandy variant	1832934	exonic;nonsynonymous
12	6234884	G	A	1846	78	74	2	0.666518	rs151088025	VWF	NA	Von Willebrand disease 1	16985174	intergenic
12	6442643	C	T	1894	30	30	0	1	rs4149584	TNFRSF1A	NA	Periodic fever, autosomal dominant	11443543	exonic;nonsynonymous
12	6443327	A	C	1923	1	1	0	1	rs104895271	TNFRSF1A	NA	Periodic fever, autosomal dominant	16508982	exonic;nonsynonymous
12	6483784	G	A	1923	1	1	0	1	null	SCNN1A	NA	Pseudohypoaldosteronism 1	10403853	exonic;stopgain
12	7842773	G	A	1919	5	5	0	1	rs140926412	GDF3	NA	Ocular & skeletal abnormalities	19864492	exonic;nonsynonymous
12	8757979	A	G	1923	1	1	0	1	null	AICDA	NA	Hyper-IgM syndrome	14962793	exonic;nonsynonymous
12	12871129	T	C	1923	1	1	0	1	rs142833529	CDKN1B	NA	Myeloproliferative syndrome	15607373	exonic;nonsynonymous
12	21699391	G	T	1923	1	1	0	1	P479Q	GYS2_HUMAN	Yes	(in glycogen storage disease type 0).	NA	exonic;nonsynonymous
12	21727209	G	A	1923	1	1	0	1	null	GYS2	NA	Glycogen storage disease 0	12072888	exonic;stopgain
12	32949101	G	T	1922	2	2	0	1	rs139734328	PKP2	NA	Arrhythmogenic right ventricular dysplasia/cardiomyopathy	20400443	exonic;nonsynonymous
12	32977026	C	T	1921	3	3	0	1	rs146102241	PKP2	NA	Arrhythmogenic right ventricular cardiomyopathy	16774985	exonic;nonsynonymous
12	32994073	G	A	1916	8	8	0	1	rs146882581	PKP2	NA	Arrhythmogenic right ventricular dysplasia/cardiomyopathy	21636032	exonic;nonsynonymous
12	33031395	G	A	1916	8	8	0	1	S140F	PKP2_HUMAN	Yes	(in familial arrhythmogenic right ventricular dysplasia type 9 [dominant?]).	NA	exonic;nonsynonymous
12	33049482	G	T	1918	6	6	0	1	null	PKP2	NA	Arrhythmogenic right ventricular dysplasia	16567567	exonic;nonsynonymous
12	33049590	C	T	1912	12	12	0	1	rs143004808	PKP2	NA	Arrhythmogenic right ventricular dysplasia	16567567	exonic;nonsynonymous
12	40677813	G	T	1920	4	4	0	1	rs35173587	LRRK2	NA	Parkinson disease	16251215	exonic;nonsynonymous
12	40692290	A	G	1923	1	1	0	1	rs35808389	LRRK2	NA	Parkinson disease	16157908	exonic;synonymous
12	40702420	A	G	1922	2	2	0	1	rs17466213	LRRK2	NA	Parkinson disease	16157901	exonic;nonsynonymous
12	40757242	C	T	1923	1	1	0	1	T2356I	LRRK2_HUMAN	Yes	(in Parkinson disease type 8).	NA	exonic;nonsynonymous
12	45795577	G	T	1923	1	1	0	1	null	ANO6	NA	Scott syndrome	21107324	splicing
12	48389093	T	C	1923	1	1	0	1	null	COL2A1	NA	Otospondylomegaepiphyseal dysplasia	16189708	splicing
12	48525177	G	A	1923	1	1	0	1	null	PFKM	NA	Glycogen storage disease 7	8444874	splicing
12	49689404	G	T	1913	11	11	0	1	rs58599399	PRPH	NA	Amyotrophic lateral sclerosis	15446584	exonic;nonsynonymous
12	50344677	C	G	1923	1	1	0	1	L22V	AQP2_HUMAN	Yes	(in diabetes insipidus nephrogenic autosomal [dominant?] [recessive?]).	NA	exonic;nonsynonymous
12	52314610	C	T	1921	3	3	0	1	rs139142865	ACVRL1	NA	Pituitary cancer	10323406	exonic;nonsynonymous
12	53298579	T	C	1918	6	6	0	1	rs59536457	KRT8	NA	Inflammatory bowel disease	15090596	exonic;nonsynonymous
12	53298582	C	A	1903	21	21	0	1	G62C	K2C8_HUMAN	Yes	(in cryptogenic cirrhosis; dbSNP:rs11554495).	NA	exonic;nonsynonymous
12	53343340	A	T	1922	2	2	0	1	rs57758506	KRT18	NA	Cryptogenic cirrhosis	9011570	exonic;nonsynonymous
12	53715207	G	T	1923	1	1	0	1	Q15K	AAAS_HUMAN	Yes	(in achalasia-addisonianism- alacrima syndrome [recessive?]).	NA	exonic;nonsynonymous
12	57424918	G	A	1907	17	17	0	1	S797F	MYO1A_HUMAN	Yes	(in deafness autosomal dominant type 48 [dominant?]).	NA	exonic;nonsynonymous
12	57431366	C	T	1923	1	1	0	1	G674D	MYO1A_HUMAN	Yes	(in deafness autosomal dominant type 48 [dominant?]).	NA	exonic;nonsynonymous
12	57437119	C	T	1907	17	17	0	1	rs55679042	MYO1A	NA	Sensorineural deafness, nonsyndromic	12736868	exonic;nonsynonymous
12	57441459	G	A	1919	5	5	0	1	rs121909305	MYO1A	NA	Sensorineural deafness, nonsyndromic	12736868	exonic;stopgain
12	66603301	G	T	1923	1	1	0	1	rs150116809	IRAK3	NA	Asthma, predisposition to	17503328	splicing
12	66786171	A	C	1919	5	5	0	1	rs144494437	GRIP1	NA	Autism	21383172	exonic;nonsynonymous
12	66838406	T	C	1919	5	5	0	1	null	GRIP1	NA	Autism	21383172	exonic;nonsynonymous
12	69744014	C	A	1803	121	119	1	0.169862	rs1800973	LYZ	NA	ALys amyloidosis, systemic	16329101	exonic;nonsynonymous
12	88494960	T	C	1922	2	2	0	1	null	CEP290	NA	Leber congenital amaurosis	16909394	intronic
12	99093210	G	A	1913	11	11	0	1	rs138526583	APAF1	NA	Major depression	16231040	exonic;nonsynonymous
12	99093226	A	C	1903	21	21	0	1	rs117235991	APAF1	NA	Major depression	16231040	exonic;nonsynonymous
12	102796022	A	T	1861	63	63	0	0.620071	rs70961704	IGF1	NA	Insulin-like growth factor deficiency	14684690	UTR3
12	103234177	C	T	1923	1	1	0	1	rs5030861	PAH	NA	Phenylketonuria	3008810	splicing
12	103234271	G	A	1922	2	2	0	1	R408W	PH4H_HUMAN	Yes	(in phenylketonuria [recessive?]; haplotypes 1;2;4;5;13;34; 41;44; most common mutation).	NA	exonic;nonsynonymous
12	103234285	G	A	1921	3	3	0	1	A403V	PH4H_HUMAN	Yes	(in non-phenylketonuria [recessive?] hyperphenylalaninemia and PKU; haplotype 43).	NA	exonic;nonsynonymous
12	103238137	G	C	1923	1	1	0	1	L348V	PH4H_HUMAN	Yes	(in phenylketonuria [recessive?]; mild haplotype 9).	NA	exonic;nonsynonymous
12	103240726	T	C	1923	1	1	0	1	I306V	PH4H_HUMAN	Yes	(in non-phenylketonuria [recessive?] hyperphenylalaninemia; haplotype 4).	NA	exonic;nonsynonymous
12	103245479	C	A	1923	1	1	0	1	A300S	PH4H_HUMAN	Yes	(in phenylketonuria [recessive?]; haplotype 1).	NA	exonic;nonsynonymous
12	103245481	A	C	1922	2	2	0	1	F299C	PH4H_HUMAN	Yes	(in phenylketonuria [recessive?]; haplotype 8).	NA	exonic;nonsynonymous
12	103260419	C	T	1922	2	2	0	1	null	PAH	NA	Phenylketonuria	9634518	exonic;nonsynonymous
12	103306579	C	T	1921	3	3	0	1	R53H	PH4H_HUMAN	Yes	(in phenylketonuria [recessive?]).	NA	exonic;nonsynonymous
12	103310879	G	C	1922	2	2	0	1	rs1801145	PAH	NA	Phenylketonuria	20457534	exonic;synonymous
12	106826199	T	A	1922	2	2	0	1	rs138249161	POLR3B	NA	Hypomyelinating leukodystrophy	22036172	exonic;nonsynonymous
12	109998873	G	A	1923	1	1	0	1	rs28941784	MMAB	NA	Methylmalonic aciduria and metabolic ketoacidosis	12471062	exonic;nonsynonymous
12	110029039	T	G	1915	9	9	0	1	rs104895331	MVK	NA	Mevalonic kinase deficiency	NA	intronic
12	110034320	G	A	1916	8	8	0	1	rs28934897	MVK	NA	Hyperimmunoglobulin D and periodic fever syndrome	10369261	exonic;nonsynonymous
12	110719585	C	G	1904	20	20	0	1	null	serca2b	NA	Colon cancer	17116488	UTR5
12	110734406	A	G	1904	20	20	0	1	rs55984131	serca2b	NA	Lung cancer	17116488	exonic;synonymous
12	110760727	C	A	1901	23	23	0	1	rs183641769	serca2b	NA	Colon cancer	17116488	intronic
12	111350901	T	G	1922	2	2	0	1	rs143139258	MYL2	NA	Cardiomyopathy, hypertrophic	18533079	exonic;splicing;nonsynonymous
12	112940006	C	T	1923	1	1	0	1	rs148176616	PTPN11	NA	Noonan syndrome	18759865	exonic;nonsynonymous
12	114837349	C	A	1911	13	13	0	1	rs77357563	TBX5	NA	Holt-Oram syndrome	16376438	exonic;nonsynonymous
12	119631654	C	T	1922	2	2	0	1	rs4628742	HSPB8	NA	Charcot-Marie-Tooth disease 2L	16086267	exonic;synonymous
12	121176678	G	A	1923	1	1	0	1	null	ACADS	NA	Acyl-CoA-dehydrogenase deficiency	16926354	exonic;nonsynonymous
12	121177107	G	T	1923	1	1	0	1	null	ACADS	NA	Acyl-CoA-dehydrogenase deficiency	12872838	exonic;nonsynonymous
12	121426830	C	T	1923	1	1	0	1	null	HNF1A	NA	Diabetes, MODY3	18003757	exonic;nonsynonymous
12	121431382	A	G	1922	2	2	0	1	rs139712739	HNF1A	NA	Diabetes, MODY3	18003757	exonic;nonsynonymous
12	121432117	G	C	1327	597	427	85	0.291384	rs56348580	HNF1A	NA	Diabetes, MODY3	16834925	exonic;synonymous
12	121437410	G	A	1919	5	5	0	1	R583Q	HNF1A_HUMAN	Yes	(in late-onset Ninsulin-dependent diabetes mellitus; also in an individual with hepatic hyperplasia and familial early-onset diabetes).	NA	exonic;nonsynonymous
12	124114943	C	T	1923	1	1	0	1	rs113994006	EIF2B1	NA	Leukoencephalopathy with vanishing white matter	11835386	splicing
13	20763051	T	G	1923	1	1	0	1	rs111033194	GJB2	NA	Deafness, autosomal recessive 1	10874298	exonic;nonsynonymous
13	20763423	G	A	1923	1	1	0	1	rs143343083	GJB2	NA	Deafness, autosomal recessive 1	10376574	exonic;nonsynonymous
13	28494372	C	A	1923	1	1	0	1	rs192902098	PDX1	NA	Diabetes mellitus, type 2 & gestational	16092045	exonic;nonsynonymous
13	28498702	C	A	1735	189	189	0	6.75811e-05	null	PDX1	NA	Diabetes mellitus, type 2	11270685	exonic;nonsynonymous
13	31843415	G	A	1923	1	1	0	1	rs80338851	B3GALTL	NA	Peters-Plus syndrome	16909395	splicing
13	32906766	C	T	1918	6	6	0	1	rs41293475	BRCA2	NA	Breast cancer	15876480	exonic;nonsynonymous
13	32907401	G	C	1923	1	1	0	1	rs56328701	BRCA2	NA	Breast cancer	17513806	exonic;nonsynonymous
13	32907407	A	G	1921	3	3	0	1	rs28897710	BRCA2	NA	Breast cancer	12845657	exonic;nonsynonymous
13	32914815	G	A	1922	2	2	0	1	rs35029074	BRCA2	NA	Breast cancer	12845657	exonic;nonsynonymous
13	32928936	A	G	1903	21	19	1	0.104457	rs76584943	BRCA2	NA	Breast and/or ovarian cancer	11304778	intronic
13	32937521	G	A	1920	4	4	0	1	V2728I	BRCA2_HUMAN	Yes	(in breast cancer).	NA	exonic;nonsynonymous
13	32953549	G	T	1923	1	1	0	1	rs28897754	BRCA2	NA	Breast and/or ovarian cancer	11400546	exonic;nonsynonymous
13	32953550	G	A	1913	11	11	0	1	rs11571769	BRCA2	NA	Breast cancer	9150172	exonic;nonsynonymous
13	48939097	G	A	1923	1	1	0	1	null	RB1	NA	Retinoblastoma	15884040	exonic;nonsynonymous
13	51519581	G	A	1915	9	9	0	1	A177T	RNH2B_HUMAN	Yes	(in Aicardi-Goutieres syndrome type 2; frequent mutation).	NA	exonic;nonsynonymous
13	52508989	G	A	1920	4	4	0	1	T1434M	ATP7B_HUMAN	Yes	(in Wilson disease [recessive?]; dbSNP:rs60986317).	NA	exonic;nonsynonymous
13	52509155	G	A	1923	1	1	0	1	rs181250704	ATP7B	NA	Wilson disease	16088907	exonic;nonsynonymous
13	52511478	G	A	1923	1	1	0	1	null	ATP7B	NA	Wilson disease	7626145	exonic;stopgain
13	52513198	T	C	1922	2	2	0	1	null	ATP7B	NA	Wilson disease	18373411	exonic;nonsynonymous
13	52513266	T	C	1904	20	18	1	0.0949503	rs7334118	ATP7B	NA	Wilson disease	18483695	exonic;nonsynonymous
13	52520508	G	A	1918	6	6	0	1	T991M	ATP7B_HUMAN	Yes	(in Wilson disease [recessive?]; dbSNP:rs41292782).	NA	exonic;nonsynonymous
13	52520541	C	T	1923	1	1	0	1	null	ATP7B	NA	Wilson disease	NA	exonic;nonsynonymous
13	52524268	C	T	1922	2	2	0	1	rs191312027	ATP7B	NA	Wilson disease	15952988	exonic;nonsynonymous
13	52532466	C	T	1922	2	2	0	1	rs137853283	ATP7B	NA	Wilson disease	8938442	exonic;stopgain
13	52534410	C	T	1919	5	5	0	1	rs72552259	ATP7B	NA	Wilson disease	9671269	exonic;nonsynonymous
13	52542680	A	G	1914	10	10	0	1	V536A	ATP7B_HUMAN	Yes	(in Wilson disease [recessive?]).	NA	exonic;nonsynonymous
13	60545105	G	T	1915	9	9	0	1	null	DIAPH3	NA	Autism	20308993	exonic;nonsynonymous
13	77574606	C	A	1895	29	29	0	1	rs138611001	CLN5	NA	Neuronal ceroid lipofuscinosis, late infantile	21990111	exonic;nonsynonymous
13	78475230	C	T	1908	16	16	0	1	S305N	EDNRB_HUMAN	Yes	(in Hirschsprung disease type 2; familial; dbSNP:rs5352).	NA	exonic;nonsynonymous
13	78475316	C	A	1923	1	1	0	1	W276C	EDNRB_HUMAN	Yes	(in Hirschsprung disease type 2).	NA	exonic;nonsynonymous
13	101020733	G	T	1907	17	17	0	1	rs61749895	PCCA	NA	Propionic acidaemia	12559849	exonic;nonsynonymous
13	101167778	T	A	1923	1	1	0	1	null	PCCA	NA	Propionic acidaemia	17051315	exonic;nonsynonymous
13	103701690	G	A	1907	17	17	0	1	rs56398830	SLC10A2	NA	Crohn's disease	7592981	exonic;nonsynonymous
13	103701773	G	A	1923	1	1	0	1	T262M	NTCP2_HUMAN	Yes	(in primary bile acid malabsorption; abolishes taurocholate transport).	NA	exonic;nonsynonymous
13	111143601	A	G	1902	22	22	0	1	null	COL4A2	NA	Haemorrhagic stroke	22209247	exonic;nonsynonymous
13	113772717	T	C	1912	12	12	0	1	rs3093266	F7	NA	Factor VII deficiency	NA	intronic
14	21161845	A	T	1922	2	2	0	1	rs121909536	ANG	NA	Amyotrophic lateral sclerosis	16501576	exonic;nonsynonymous
14	21161931	A	G	1923	1	1	0	1	rs121909541	ANG	NA	Amyotrophic lateral sclerosis	16501576	exonic;nonsynonymous
14	21771703	G	A	1923	1	1	0	1	null	RPGRIP1	NA	Leber congenital amaurosis	16123401	splicing
14	21794132	C	G	1923	1	1	0	1	null	RPGRIP1	NA	Glaucoma, primary open angle	21224891	exonic;nonsynonymous
14	21795769	G	T	1923	1	1	0	1	null	RPGRIP1	NA	Leber congenital amaurosis	16123401	intronic
14	23862177	C	G	1923	1	1	0	1	null	MYH6	NA	Cardiomyopathy, hypertrophic	15998695	exonic;nonsynonymous
14	23891481	C	T	1907	17	17	0	1	rs45540831	MYH7	NA	Cardiomyopathy, hypertrophic	21302287	exonic;synonymous
14	23892910	A	G	1923	1	1	0	1	rs145532615	MYH7	NA	Increased left ventricular wall thickness	16754800	exonic;nonsynonymous
14	24709952	G	T	1923	1	1	0	1	rs142777869	TINF2	NA	Aplastic anaemia	18669893	exonic;nonsynonymous
14	24724656	T	C	1906	18	18	0	1	E520G	TGM1_HUMAN	Yes	(in ichthyosis congenital autosomal recessive TGM1-related [recessive?]).	NA	exonic;nonsynonymous
14	24724663	C	T	1884	40	40	0	1	rs35312232	TGM1	NA	Ichthyosis, lamellar	9545389	exonic;nonsynonymous
14	24728975	G	C	1922	2	2	0	1	R307G	TGM1_HUMAN	Yes	(in ichthyosis congenital autosomal recessive TGM1-related [recessive?]).	NA	exonic;nonsynonymous
14	24731434	G	T	1915	9	9	0	1	S42Y	TGM1_HUMAN	Yes	(in ichthyosis lamellar type 1; dbSNP:rs41295338).	NA	exonic;nonsynonymous
14	31348043	C	A	1923	1	1	0	1	null	COCH	NA	Hearing loss, unilateral	22534022	exonic;nonsynonymous
14	32319298	T	C	1916	8	8	0	1	rs118161496	NUBPL	NA	Complex I deficiency	20818383	intronic
14	37135753	G	C	1184	740	450	145	0.733453	rs4904210	PAX9	NA	Oligodontia	20077892	exonic;nonsynonymous
14	51378517	C	G	1907	17	17	0	1	rs35026927	PYGL	NA	Glycogen storage disease 6	17705025	exonic;nonsynonymous
14	51382637	G	A	1909	15	15	0	1	rs143759519	PYGL	NA	Glycogen storage disease 6	21646031	exonic;nonsynonymous
14	55369314	G	A	1841	83	83	0	0.252652	P23L	GCH1_HUMAN	Yes	(in dystonia type 5 [dominant?]; dbSNP:rs41298432).	NA	exonic;nonsynonymous
14	64676751	C	T	1907	17	17	0	1	T6211M	SYNE2_HUMAN	Yes	(in Emery-Dreifuss muscular dystrophy type 5).	NA	exonic;nonsynonymous
14	64892470	G	A	1920	4	4	0	1	R293H	C1TC_HUMAN	Yes	(associated with susceptibility to folate-sensitive neural tube defects; dbSNP:rs34181110).	NA	exonic;nonsynonymous
14	65237750	G	A	1916	8	8	0	1	rs148337824	SPTB	NA	Spherocytosis	9887280	exonic;nonsynonymous
14	73600361	A	G	1920	4	4	0	1	null	PSEN1	NA	Alzheimer disease	10655540	intergenic
14	73602899	C	G	1910	14	14	0	1	rs34086577	PSEN1	NA	Alzheimer disease	10655540	upstream
14	74953134	C	T	1921	3	3	0	1	V30M	NPC2_HUMAN	Yes	(in Niemann-Pick disease type C2).	NA	exonic;nonsynonymous
14	75472570	G	T	1922	2	2	0	1	rs113994012	EIF2B2	NA	Leukoencephalopathy with vanishing white matter	14566705	exonic;splicing;nonsynonymous
14	75513534	G	A	1922	2	2	0	1	rs17102999	MLH3	NA	Endometrial cancer	16885347	exonic;nonsynonymous
14	75514138	C	A	1912	12	12	0	1	rs28756990	MLH3	NA	Colorectal cancer, increased risk	12702580	exonic;nonsynonymous
14	75514489	C	G	1905	19	19	0	1	E624Q	MLH3_HUMAN	Yes	(in hereditary non-polyposis colorectal cancer type 7 [dominant?]; dbSNP:rs28756986).	NA	exonic;nonsynonymous
14	81422124	G	A	1923	1	1	0	1	rs45499704	TSHR	NA	Hypothyroidism	16060907	exonic;nonsynonymous
14	81558891	C	G	1923	1	1	0	1	P162A	TSHR_HUMAN	Yes	(in congenital hypothyroidism non-goitrous type 1).	NA	exonic;nonsynonymous
14	88452941	T	C	1917	7	7	0	1	null	GALC	NA	Krabbe disease	8687180	exonic;nonsynonymous
14	88459340	C	T	1800	124	124	0	0.0278859	null	GALC	NA	Krabbe disease	17579360	exonic;nonsynonymous
14	92471238	G	A	1923	1	1	0	1	rs149562813	TRIP11	NA	Achondrogenesis type 1A	20089971	exonic;stopgain
14	92583927	T	A	1912	12	12	0	1	rs149760197	NDUFB1	NA	Complex I deficiency	20818383	exonic;nonsynonymous
14	94750486	T	C	1897	27	27	0	1	rs2232710	SERPINA10	NA	Venous thromboembolic disease	15461625	exonic;nonsynonymous
14	94754643	C	T	1920	4	4	0	1	rs61754487	SERPINA10	NA	Venous thromboembolic disease	15461625	exonic;stopgain
14	94756669	G	A	1913	11	11	0	1	rs2232698	SERPINA10	NA	Venous thromboembolic disease	15461625	exonic;stopgain
14	94780642	A	T	1921	3	3	0	1	L115H	CBG_HUMAN	Yes	(in corticosteroid-binding globulin deficiency; Leuven; decreased cortisol-binding affinity; dbSNP:rs28929488).	NA	exonic;nonsynonymous
14	94844865	G	A	1922	2	2	0	1	null	SERPINA1	NA	Antitrypsin alpha 1 deficiency	2784123	exonic;nonsynonymous
14	94844866	G	A	1920	4	4	0	1	rs61761869	SERPINA1	NA	Antitrypsin alpha 1 deficiency	NA	exonic;nonsynonymous
14	94844947	C	T	1894	30	30	0	1	rs28929474	SERPINA1	NA	Antitrypsin alpha 1 deficiency	6306478	exonic;nonsynonymous
14	94847262	T	A	1838	86	78	4	0.116578	rs17580	SERPINA1	NA	Antitrypsin alpha 1 deficiency	2567291	exonic;nonsynonymous
14	94847386	G	A	1913	11	11	0	1	rs28929470	SERPINA1	NA	Antitrypsin alpha 1 deficiency	2035534	exonic;nonsynonymous
14	94849249	G	A	1923	1	1	0	1	null	SERPINA1	NA	Antitrypsin alpha 1 deficiency	9459000	exonic;nonsynonymous
14	94849388	G	A	1921	3	3	0	1	rs28931570	SERPINA1	NA	Antitrypsin alpha 1 deficiency	2606478	exonic;nonsynonymous
14	95085642	C	G	1911	13	13	0	1	rs17473	SERPINA3	NA	Obstructive lung disease	8244391	exonic;nonsynonymous
14	103342015	C	T	1916	8	8	0	1	null	TRAF3	NA	TRAF3 deficiency	20832341	exonic;nonsynonymous
15	28116316	G	A	1923	1	1	0	1	P743L	P_HUMAN	Yes	(in albinism oculocutaneous type 2 [recessive?] and unclassified OCA).	NA	exonic;nonsynonymous
15	28171315	C	G	1923	1	1	0	1	rs121918169	OCA2	NA	Albinism, oculocutaneous II	10987646	exonic;nonsynonymous
15	28228553	C	T	1920	4	4	0	1	A481T	P_HUMAN	Yes	(in albinism oculocutaneous type 2 [recessive?]).	NA	exonic;nonsynonymous
15	28230247	C	T	1915	9	9	0	1	V443I	P_HUMAN	Yes	(in albinism oculocutaneous type 2 [recessive?]; dbSNP:rs28934272).	NA	exonic;nonsynonymous
15	28267738	T	C	1904	20	20	0	1	rs145242923	OCA2	NA	Albinism, oculocutaneous II	7762554	intronic
15	39880674	G	A	1920	4	4	0	1	rs55924981	THBS1	NA	Pulmonary hypertension	22198906	intronic
15	40509781	G	C	1923	1	1	0	1	Q921H	BUB1B_HUMAN	Yes	(in mosaic variegated aneuploidy syndrome [recessive?]; associated with F-844; heterozygous compound with nonsense mutation; dbSNP:rs28989183).	NA	exonic;nonsynonymous
15	40703799	G	T	1923	1	1	0	1	G199V	IVD_HUMAN	Yes	(in isovaleric acidemia).	NA	exonic;nonsynonymous
15	40707653	C	T	1922	2	2	0	1	A311V	IVD_HUMAN	Yes	(in isovaleric acidemia).	NA	exonic;nonsynonymous
15	42676690	G	A	1919	5	5	0	1	rs150616566	CAPN3	NA	Muscular dystrophy, limb girdle	16141003	exonic;nonsynonymous
15	42691815	G	A	1923	1	1	0	1	null	CAPN3	NA	Muscular dystrophy, limb girdle	15221789	exonic;nonsynonymous
15	42695919	C	G	1918	6	6	0	1	null	CAPN3	NA	Muscular dystrophy, limb girdle	16141003	intronic
15	42701570	G	T	1923	1	1	0	1	null	CAPN3	NA	Muscular dystrophy, limb girdle	16141003	exonic;nonsynonymous
15	42702858	G	A	1922	2	2	0	1	rs146923842	CAPN3	NA	Muscular dystrophy, limb girdle	15221789	exonic;nonsynonymous
15	42703497	C	A	1922	2	2	0	1	rs149095128	CAPN3	NA	Muscular dystrophy, limb girdle 2A	18055493	exonic;nonsynonymous
15	43018518	C	T	1902	22	20	1	0.11434	rs61746356	CDAN1	NA	Congenital dysorythropoietic anaemia type 1	16141353	exonic;nonsynonymous
15	43552349	C	A	1909	15	15	0	1	G113C	TGM5_HUMAN	Yes	(in peeling skin syndrome acral type [recessive?]; completely abolishes the enzyme activity).	NA	exonic;nonsynonymous
15	45397993	C	T	1904	20	20	0	1	rs138353181	DUOX2	NA	Hypothyroidism	21565790	exonic;nonsynonymous
15	45400303	C	T	1923	1	1	0	1	null	DUOX2	NA	Hypothyroidism	17121535	exonic;nonsynonymous
15	48500263	G	A	1910	14	14	0	1	rs34819316	SLC12A1	NA	Bartter syndrome	20219833	exonic;nonsynonymous
15	48704816	G	A	1921	3	3	0	1	R2726W	FBN1_HUMAN	Yes	(in Marfan syndrome [dominant?]; defects in protein processing).	NA	exonic;nonsynonymous
15	48722907	G	A	1923	1	1	0	1	rs363835	FBN1	NA	Thoracic aortic aneurysm or dissection	19293843	exonic;nonsynonymous
15	48725102	C	T	1922	2	2	0	1	rs112084407	FBN1	NA	Marfan syndrome	17253931	exonic;nonsynonymous
15	48737578	C	T	1923	1	1	0	1	C1971Y	FBN1_HUMAN	Yes	(in Marfan syndrome [dominant?]).	NA	exonic;nonsynonymous
15	48748913	C	T	1910	14	14	0	1	rs140649	FBN1	NA	Marfan syndrome	17627385	exonic;synonymous
15	48779352	C	T	1918	6	6	0	1	R1170H	FBN1_HUMAN	Yes	(in Marfan syndrome [dominant?]; mild).	NA	exonic;nonsynonymous
15	48780353	G	A	1909	15	15	0	1	rs140587	FBN1	NA	Marfan syndrome	17627385	exonic;synonymous
15	48782072	T	C	1923	1	1	0	1	rs111801777	FBN1	NA	Marfan syndrome	11175294	exonic;nonsynonymous
15	48936908	T	C	1923	1	1	0	1	Y20C	FBN1_HUMAN	Yes	(in Marfan syndrome [dominant?]).	NA	exonic;nonsynonymous
15	49060434	T	C	1923	1	1	0	1	null	CEP152	NA	Seckel syndrome	21131973	exonic;nonsynonymous
15	49085556	T	G	1923	1	1	0	1	null	CEP152	NA	Primary microcephaly	20598275	exonic;nonsynonymous
15	52643564	G	A	1591	333	281	26	0.5747	rs1058219	MYO5A	NA	Griscelli syndrome	9207796	exonic;nonsynonymous
15	58855748	C	T	1921	3	3	0	1	rs113298164	LIPC	NA	Hepatic lipase deficiency	1671786	exonic;nonsynonymous
15	58957371	C	G	1921	3	3	0	1	rs61751103	ADAM10	NA	Alzheimer disease, late onset	19608551	exonic;nonsynonymous
15	68504005	G	A	1890	34	34	0	1	null	CLN6	NA	Neuronal ceroid lipofuscinosis, late infantile	21990111	intronic
15	68521889	C	T	1848	76	76	0	0.395036	null	CLN6	NA	Neuronal ceroid lipofuscinosis, late infantile	21990111	exonic;nonsynonymous
15	72642859	C	T	1923	1	1	0	1	G269S	HEXA_HUMAN	Yes	(in GM2-gangliosidosis type 1 [recessive?]; late onset; inhibited subunit dissociation).	NA	exonic;splicing;nonsynonymous
15	72642925	G	A	1917	7	7	0	1	rs121907970	HEXA	NA	Beta-hexosaminidase pseudodeficiency	1384323	exonic;nonsynonymous
15	72643444	A	C	1886	38	38	0	1	rs117160567	HEXA	NA	Tay-Sachs disease	7717398	intronic
15	75185647	G	A	1923	1	1	0	1	R219Q	MPI_HUMAN	Yes	(in congenital disorder of glycosylation type 1B).	NA	exonic;nonsynonymous
15	80465431	C	T	1923	1	1	0	1	rs80338898	FAH	NA	Tyrosinaemia 1	9633815	exonic;nonsynonymous
15	80472526	C	T	1891	33	33	0	1	rs11555096	FAH	NA	Tyrosinaemia 1	7977370	exonic;nonsynonymous
15	89861826	T	C	1853	71	67	2	0.374065	rs2307441	POLG	NA	Ataxic neuropathy	15477547	exonic;nonsynonymous
15	89865073	T	C	1908	16	16	0	1	Y831C	DPOG1_HUMAN	Yes	(in progressive external ophthalmoplegia with mitochondrial DNA deletions autosomal dominant type 1 [dominant?]; also found in mitochondrial DNA depletion syndrome; dbSNP:rs4154971).	NA	exonic;nonsynonymous
15	89866691	C	G	1920	4	4	0	1	G737R	DPOG1_HUMAN	Yes	(in progressive external ophthalmoplegia with mitochondrial DNA deletions autosomal recessive [dominant?] [recessive?]; with absence of progressive external ophthalmoplegia).	NA	exonic;nonsynonymous
15	89868870	G	A	1920	4	4	0	1	P587L	DPOG1_HUMAN	Yes	(in progressive external ophthalmoplegia with mitochondrial DNA deletions autosomal recessive [dominant?] [recessive?]; also found in mitochondrial neurogastrointestinal encephalopathy syndrome [recessive?]; Alpers-Huttenlocher syndrome [recessive?] and mitochondrial DNA depletion syndrome).	NA	exonic;nonsynonymous
15	89870178	C	A	1913	11	11	0	1	G517V	DPOG1_HUMAN	Yes	(in progressive external ophthalmoplegia with mitochondrial DNA deletions autosomal recessive [dominant?] [recessive?]; sporadic case; dbSNP:rs61752783).	NA	exonic;nonsynonymous
15	89871763	G	C	1921	3	3	0	1	rs145289229	POLG	NA	Alpers syndrome	20434700	exonic;nonsynonymous
15	89873337	T	A	1923	1	1	0	1	rs138929605	POLG	NA	Alpers syndrome	18487244	exonic;nonsynonymous
15	89873364	C	G	1913	11	11	0	1	G268A	DPOG1_HUMAN	Yes	(in progressive external ophthalmoplegia with mitochondrial DNA deletions autosomal recessive [dominant?] [recessive?]; sporadic case; dbSNP:rs61752784).	NA	exonic;nonsynonymous
15	89873415	G	A	1923	1	1	0	1	T251I	DPOG1_HUMAN	Yes	(in progressive external ophthalmoplegia with mitochondrial DNA deletions autosomal recessive [dominant?] [recessive?]; also found in mitochondrial neurogastrointestinal encephalopathy syndrome [recessive?] with no leukoencephalopathy; Alpers-Huttenlocher syndrome [recessive?] and mitochondrial DNA depletion syndrome).	NA	exonic;nonsynonymous
15	89876558	G	A	1923	1	1	0	1	null	POLG	NA	Alpers syndrome	17452231	exonic;nonsynonymous
15	91304245	C	T	1923	1	1	0	1	null	BLM	NA	Bloom syndrome	17407155	exonic;stopgain
15	99192826	G	A	1923	1	1	0	1	null	IGF1R	NA	Short stature	NA	exonic;nonsynonymous
15	99454613	G	A	1918	6	6	0	1	rs33958176	IGF1R	NA	Growth retardation	17264177	exonic;nonsynonymous
16	1256126	G	A	1911	13	13	0	1	rs58173258	CACNA1H	NA	Idiopathic epilepsy, generalised	17696120	exonic;nonsynonymous
16	1642177	C	T	1923	1	1	0	1	null	IFT140	NA	Mainzer-Saldino syndrome / Jeune syndrome	22503633	exonic;splicing;nonsynonymous
16	2096239	G	A	1923	1	1	0	1	rs150766139	NTHL1	NA	Nth endonuclease III-like 1 deficiency	18515411	exonic;stopgain
16	2138570	C	T	1921	3	3	0	1	rs45517423	TSC2	NA	Tuberous sclerosis and lymphangiomyomatosis	11208653	exonic;nonsynonymous
16	2139814	G	A	1914	10	10	0	1	R4276W	PKD1_HUMAN	Yes	(in polycystic kidney disease autosomal dominant type 1 [dominant?]).	NA	exonic;nonsynonymous
16	2141025	G	A	1916	8	8	0	1	null	PKD1	NA	Polycystic kidney disease 1	17582161	exonic;stopgain
16	2144182	G	A	1907	17	17	0	1	T3510M	PKD1_HUMAN	Yes	(in polycystic kidney disease autosomal dominant type 1 [dominant?]).	NA	exonic;nonsynonymous
16	2150466	T	A	1923	1	1	0	1	I3167F	PKD1_HUMAN	Yes	(in polycystic kidney disease autosomal dominant type 1 [dominant?]).	NA	exonic;nonsynonymous
16	2153765	G	A	1903	21	19	1	0.104457	rs144979397	PKD1	NA	Polycystic kidney disease 1	19165178	exonic;nonsynonymous
16	2158419	G	A	1914	10	10	0	1	rs139971481	PKD1	NA	Polycystic kidney disease 1	10854095	exonic;nonsynonymous
16	2158570	G	A	1897	27	25	1	0.168884	R2200C	PKD1_HUMAN	Yes	(in polycystic kidney disease autosomal dominant type 1 [dominant?]).	NA	exonic;nonsynonymous
16	2158672	G	A	1922	2	2	0	1	rs146096401	PKD1	NA	Polycystic kidney disease 1	17574468	exonic;nonsynonymous
16	2161150	G	A	1918	6	6	0	1	R1340W	PKD1_HUMAN	Yes	(in polycystic kidney disease autosomal dominant type 1 [dominant?]).	NA	exonic;nonsynonymous
16	2296927	G	A	1917	7	7	0	1	rs112729404	ECI1	NA	Complex I deficiency	20818383	exonic;nonsynonymous
16	2350115	G	T	1917	7	7	0	1	rs141621969	ABCA3	NA	Pulmonary hypertension	18492541	exonic;nonsynonymous
16	2367764	T	A	1911	13	13	0	1	rs149989682	ABCA3	NA	Pneumonitis, desquamative interstitial	15976379	exonic;splicing;nonsynonymous
16	2369592	C	T	1906	18	16	1	0.0771171	rs117603931	ABCA3	NA	Fatal surfactant deficiency	16728712	exonic;nonsynonymous
16	2374485	C	T	1922	2	2	0	1	rs145087575	ABCA3	NA	Lung disease modifier association with SFTPC mutation	20371530	exonic;nonsynonymous
16	3293257	C	A	1921	3	3	0	1	rs61732874	MEFV	NA	Mediterranean fever, familial	9668175	exonic;nonsynonymous
16	3293310	A	G	1921	3	3	0	1	rs28940579	MEFV	NA	Mediterranean fever, familial	9288758	exonic;nonsynonymous
16	3293338	G	T	1923	1	1	0	1	rs104895192	MEFV	NA	Mediterranean fever, familial	NA	exonic;nonsynonymous
16	3293403	T	C	1922	2	2	0	1	rs104895094	MEFV	NA	Mediterranean fever, familial	9668175	exonic;nonsynonymous
16	3293868	G	A	1923	1	1	0	1	rs104895191	MEFV	NA	Mediterranean fever, familial	NA	exonic;nonsynonymous
16	3293880	A	G	1888	36	36	0	1	rs11466045	MEFV	NA	Mediterranean fever, familial	11464238	exonic;nonsynonymous
16	3297233	G	A	1923	1	1	0	1	rs104895151	MEFV	NA	Mediterranean fever, familial	NA	exonic;nonsynonymous
16	3299586	G	A	1910	14	14	0	1	rs11466023	MEFV	NA	Mediterranean fever, familial	10090880	exonic;nonsynonymous
16	3706649	G	A	1923	1	1	0	1	rs143058517	DNASE1	NA	Autoimmune thyroid disease	19022625	exonic;nonsynonymous
16	3707191	G	A	1911	13	13	0	1	rs74892550	DNASE1	NA	Systemic lupus erythematosus	15593183	exonic;nonsynonymous
16	3779115	T	C	1910	14	12	1	0.0465153	rs112906840	CREBBP	NA	Rubinstein-Taybi syndrome	12070251	exonic;nonsynonymous
16	3819294	C	T	1912	12	12	0	1	rs61753380	CREBBP	NA	Rubinstein-Taybi syndrome	12070251	exonic;nonsynonymous
16	8898645	T	G	1923	1	1	0	1	null	PMM2	NA	Congenital disorder of glycosylation 1a	16435227	exonic;nonsynonymous
16	8905010	G	A	1912	12	12	0	1	R141H	PMM2_HUMAN	Yes	(in congenital disorder of glycosylation type 1A [recessive?]; frequent mutation; loss of activity; observed in heterozygous patients; homozygosis of this mutation is incompatible with life; dbSNP:rs28936415).	NA	exonic;nonsynonymous
16	8905517	T	C	1923	1	1	0	1	F157S	PMM2_HUMAN	Yes	(in congenital disorder of glycosylation type 1A [recessive?]).	NA	exonic;nonsynonymous
16	14041848	C	T	1921	3	3	0	1	rs121913049	ERCC4	NA	Xeroderma pigmentosum (F)	8797827	exonic;nonsynonymous
16	15872688	G	A	1919	5	5	0	1	null	MYH11	NA	Altered myosin contractile function	22511748	exonic;nonsynonymous
16	16255424	G	A	1884	40	40	0	1	rs41278172	ABCC6	NA	Pseudoxanthoma elasticum	16835894	intronic
16	16256866	G	A	1923	1	1	0	1	rs72653744	ABCC6	NA	Pseudoxanthoma elasticum, autosomal recessive	10954200	exonic;stopgain
16	16256935	G	A	1923	1	1	0	1	rs72653706	ABCC6	NA	Pseudoxanthoma elasticum, autosomal recessive	10811882	exonic;stopgain
16	16295863	T	C	1909	15	15	0	1	rs72653762	ABCC6	NA	Pseudoxanthoma elasticum, autosomal recessive	15086542	exonic;nonsynonymous
16	16295926	T	C	1923	1	1	0	1	rs72653760	ABCC6	NA	Pseudoxanthoma elasticum	16086317	exonic;nonsynonymous
16	20352584	G	A	1920	4	4	0	1	rs143583842	UMOD	NA	Tubulointerstitial nephritis	21868615	exonic;nonsynonymous
16	23200963	G	A	1904	20	20	0	1	rs5738	SCNN1G	NA	Bronchiectasis	18507830	exonic;nonsynonymous
16	23360165	C	G	1913	11	11	0	1	S82C	SCNNB_HUMAN	Yes	(in bronchiectasis with or without elevated sweat chloride type 1).	NA	exonic;nonsynonymous
16	23635348	A	C	1920	4	4	0	1	rs45478192	PALB2	NA	Breast cancer, increased risk	20722467	exonic;nonsynonymous
16	31196496	A	G	1923	1	1	0	1	null	FUS	NA	Frontotemporal lobar degeneration	20124201	exonic;nonsynonymous
16	31202800	G	A	1908	16	16	0	1	null	FUS	NA	Amyotrophic lateral sclerosis	22292843	UTR3
16	31202891	C	A	1922	2	2	0	1	null	FUS	NA	Amyotrophic lateral sclerosis	22292843	UTR3
16	31501798	A	G	1911	13	13	0	1	N654S	SC5A2_HUMAN	Yes	(in renal glucosuria [recessive?]).	NA	exonic;nonsynonymous
16	47549473	G	T	1899	25	25	0	1	rs56257827	PHKB	NA	Liver glycogenosis	17689125	exonic;nonsynonymous
16	47627432	G	T	1923	1	1	0	1	null	PHKB	NA	Phosphorylase kinase deficiency	21646031	exonic;stopgain
16	53639522	G	A	1920	4	4	0	1	rs151332923	RPGRIP1L	NA	Meckel syndrome	19430481	exonic;nonsynonymous
16	56535283	G	A	1922	2	2	0	1	null	BBS2	NA	Bardet-Biedl syndrome	22353939	exonic;nonsynonymous
16	56901062	G	C	1917	7	7	0	1	null	SLC12A3	NA	Gitelman syndrome	22009145	exonic;nonsynonymous
16	56906568	C	T	1917	7	7	0	1	rs142679083	SLC12A3	NA	Gitelman syndrome	21415153	exonic;splicing;nonsynonymous
16	56906652	C	T	1923	1	1	0	1	null	SLC12A3	NA	Gitelman syndrome	17329572	exonic;nonsynonymous
16	56913508	G	A	1923	1	1	0	1	A464T	S12A3_HUMAN	Yes	(in Gitelman syndrome [recessive?]).	NA	exonic;nonsynonymous
16	56914117	C	T	1923	1	1	0	1	null	SLC12A3	NA	Gitelman syndrome	21415153	exonic;nonsynonymous
16	56921840	G	A	1895	29	29	0	1	rs36049418	SLC12A3	NA	Gitelman syndrome	8528245	exonic;nonsynonymous
16	56928536	T	C	1923	1	1	0	1	null	SLC12A3	NA	Gitelman syndrome	22009145	exonic;nonsynonymous
16	56936319	C	T	1892	32	32	0	1	rs12708965	SLC12A3	NA	Gitelman syndrome	9734597	exonic;nonsynonymous
16	56936421	G	T	1922	2	2	0	1	null	SLC12A3	NA	Gitelman syndrome	8528245	splicing
16	56938301	G	A	1901	23	23	0	1	null	SLC12A3	NA	Gitelman syndrome	22009145	intronic
16	57935275	T	A	1921	3	3	0	1	null	CNGB1	NA	Retinitis pigmentosa	21147909	exonic;nonsynonymous
16	57937773	C	T	1922	2	2	0	1	null	CNGB1	NA	Retinitis pigmentosa	22025579	exonic;nonsynonymous
16	68855966	G	A	1918	6	6	0	1	rs35187787	CDH1	NA	Breast cancer	NA	exonic;nonsynonymous
16	68867187	C	G	1919	5	5	0	1	rs139757930	CDH1	NA	Gastric cancer	17221870	intronic
16	72055100	C	T	1923	1	1	0	1	R199C	PYRD_HUMAN	Yes	(in postaxial acrofacial dysostosis).	NA	exonic;nonsynonymous
16	72055110	G	C	1923	1	1	0	1	G202A	PYRD_HUMAN	Yes	(in postaxial acrofacial dysostosis).	NA	exonic;nonsynonymous
16	72094308	T	C	1923	1	1	0	1	rs104894517	HP	NA	Anhaptoglobinaemia	14999562	exonic;nonsynonymous
16	81298282	C	T	1920	4	4	0	1	rs119478057	BCMO1	NA	Hypercarotenemia and hypovitaminosis A	17951468	exonic;nonsynonymous
16	81411091	C	G	1916	8	8	0	1	rs79901179	GAN	NA	Giant axonal neuropathy	14718689	exonic;nonsynonymous
16	86602272	A	G	1922	2	2	0	1	rs147258453	FOXC2	NA	Lymphoedema, primary	19760751	exonic;nonsynonymous
16	88878305	C	T	1923	1	1	0	1	null	APRT	NA	Adenine phosphoribosyltransferase deficiency	20150536	exonic;nonsynonymous
16	88893122	C	T	1918	6	6	0	1	R376Q	GALNS_HUMAN	Yes	(in mucopolysaccharidosis type 4A [recessive?]; severe form).	NA	exonic;nonsynonymous
16	89180844	G	A	1923	1	1	0	1	rs150487794	ACSF3	NA	Malonic & methylmalonic aciduria, combined	21785126	exonic;nonsynonymous
16	89220556	C	T	1919	5	5	0	1	rs141090143	ACSF3	NA	Malonic & methylmalonic aciduria, combined	21841779	exonic;nonsynonymous
16	89598369	G	A	1919	5	5	0	1	rs141659620	SPG7	NA	Spastic paraplegia	20186691	exonic;nonsynonymous
16	89613145	C	T	1909	15	15	0	1	rs61755320	SPG7	NA	Upper motor neuron syndrome	18799786	exonic;nonsynonymous
16	89842176	C	G	1917	7	7	0	1	rs139235751	FANCA	NA	Fanconi anaemia	21273304	exonic;nonsynonymous
16	89882959	C	T	1914	10	10	0	1	null	FANCA	NA	Fanconi anaemia	9371798	exonic;stopgain
16	89985778	G	A	1916	8	8	0	1	null	MC1R	NA	Melanoma	19338054	exonic;nonsynonymous
16	89986025	T	C	1923	1	1	0	1	null	MC1R	NA	Melanoma	21672182	exonic;nonsynonymous
16	89986130	T	C	1908	16	16	0	1	rs1110400	MC1R	NA	Red hair, increased risk	11030758	exonic;nonsynonymous
16	89986583	G	A	1922	2	2	0	1	null	MC1R	NA	Basal cell carcinoma	16645598	exonic;nonsynonymous
17	3402294	A	C	1923	1	1	0	1	E285A	ACY2_HUMAN	Yes	(in Canavan disease; predominant mutation in Ashkenazi Jewish population; 99% loss of activity; dbSNP:rs28940279).	NA	exonic;nonsynonymous
17	3844344	C	T	1922	2	2	0	1	rs144535413	ATP2A3	NA	Adenoma of hypophisis	19100511	exonic;nonsynonymous
17	4858392	G	A	1922	2	2	0	1	rs121918403	ENO3	NA	Beta-enolase deficiency	11506403	exonic;nonsynonymous
17	6329030	C	A	1923	1	1	0	1	rs62637015	AIPL1	NA	Leber congenital amaurosis IV	10873396	exonic;nonsynonymous
17	6331702	T	A	1913	11	11	0	1	rs16955851	AIPL1	NA	Leber congenital amaurosis IV	15249368	exonic;nonsynonymous
17	6331817	C	T	1899	25	25	0	1	rs62619924	AIPL1	NA	Leber congenital amaurosis IV	10873396	exonic;nonsynonymous
17	6337271	G	A	1920	4	4	0	1	rs144822294	AIPL1	NA	Leber congenital amaurosis IV	12881340	exonic;nonsynonymous
17	6371557	C	G	1918	6	6	0	1	rs76024428	PITPNM3	NA	Cone dystrophy, autosomal dominant	17377520	exonic;nonsynonymous
17	7125591	T	C	1922	2	2	0	1	V283A	ACADV_HUMAN	Yes	(in very long chain acyl- CoA dehydrogenase deficiency [recessive?]).	NA	exonic;nonsynonymous
17	7127698	C	T	1922	2	2	0	1	rs146379816	ACADVL	NA	Very long chain acyl-CoA dehydrogenase deficiency	21932095	exonic;nonsynonymous
17	7128292	G	A	1919	5	5	0	1	R615Q	ACADV_HUMAN	Yes	(in very long chain acyl- CoA dehydrogenase deficiency [recessive?]).	NA	exonic;nonsynonymous
17	7189048	G	A	1917	7	7	0	1	V383I	GTR4_HUMAN	Yes	(in noninsulin-dependent diabetes mellitus).	NA	exonic;nonsynonymous
17	7534678	C	T	1910	14	14	0	1	rs6258	SHBG	NA	Hyperandrogenism	11927624	exonic;splicing;nonsynonymous
17	7906672	G	A	1576	348	336	6	4.26314e-10	rs61749668	GUCY2D	NA	Leber congenital amaurosis	18055820	exonic;nonsynonymous
17	7909747	C	T	1923	1	1	0	1	rs138836357	GUCY2D	NA	Leber congenital amaurosis	17964524	exonic;nonsynonymous
17	7915912	C	T	1889	35	35	0	1	P701S	GUC2D_HUMAN	Yes	(in Leber congenital amaurosis type 1 [recessive?]; dbSNP:rs34598902).	NA	exonic;nonsynonymous
17	8006708	G	A	1922	2	2	0	1	rs147149459	ALOXE3	NA	Ichthyosis, congenital, autosomal recessive	16116617	exonic;nonsynonymous
17	10432735	G	C	1917	7	7	0	1	rs142586585	MYH2	NA	Inclusion body myopathy	15741996	exonic;nonsynonymous
17	10433181	C	T	1916	8	8	0	1	rs143872329	MYH2	NA	Inclusion body myopathy	15741996	exonic;nonsynonymous
17	10535839	G	A	1915	9	9	0	1	A1637V	MYH3_HUMAN	Yes	(in distal arthrogryposis type 2B; dbSNP:rs34165480).	NA	exonic;nonsynonymous
17	10550522	G	C	1923	1	1	0	1	S292C	MYH3_HUMAN	Yes	(in distal arthrogryposis type 2B).	NA	exonic;nonsynonymous
17	12896200	C	G	1922	2	2	0	1	null	ELAC2	NA	Prostate cancer	11522646	exonic;nonsynonymous
17	16216860	G	A	1923	1	1	0	1	null	PIGL	NA	Colobomas, heart defects, ichthyosiform dermatosis, mental retard	22444671	splicing
17	16220000	T	C	1922	2	2	0	1	null	PIGL	NA	Colobomas, heart defects, ichthyosiform dermatosis, mental retard	22444671	exonic;nonsynonymous
17	16843666	C	T	1920	4	4	0	1	R202H	TR13B_HUMAN	Yes	(in common variable immunodeficiency).	NA	exonic;nonsynonymous
17	16843729	G	T	1909	15	15	0	1	rs72553883	TNFRSF13B	NA	Immunodeficiency, common variable	16007087	exonic;nonsynonymous
17	16852187	A	G	1904	20	20	0	1	C104R	TR13B_HUMAN	Yes	(in common variable immunodeficiency and immunoglobulin A deficiency 2; dbSNP:rs34557412).	NA	exonic;nonsynonymous
17	16852237	A	T	1923	1	1	0	1	rs72553877	TNFRSF13B	NA	Antibody deficiency	18981294	exonic;nonsynonymous
17	16852282	C	T	1918	6	6	0	1	rs55916807	TNFRSF13B	NA	Immunodeficiency, common variable	17983875	exonic;nonsynonymous
17	17723595	G	A	1922	2	2	0	1	rs115855236	SREBF1	NA	Hypolipidaemia, primary combined	21645898	exonic;nonsynonymous
17	18051447	C	T	1914	10	10	0	1	rs121908970	MYO15A	NA	Sensorineural deafness in SMS	11735029	exonic;nonsynonymous
17	18052106	G	A	1919	5	5	0	1	rs114274755	MYO15A	NA	Deafness, non-syndromic, autosomal recessive	17546645	exonic;nonsynonymous
17	18064722	C	T	1904	20	20	0	1	rs140029076	MYO15A	NA	Deafness, non-syndromic, autosomal recessive	17546645	exonic;nonsynonymous
17	27067552	G	C	1921	3	3	0	1	rs146326420	NEK8	NA	Nephronophthisis	18199800	exonic;nonsynonymous
17	29325767	G	A	1923	1	1	0	1	rs121918162	RNF135	NA	Overgrowth, dysmorphism and learning disabilities	17632510	exonic;nonsynonymous
17	29422353	G	A	1922	2	2	0	1	null	NF1	NA	Neurofibromatosis 1	10712197	exonic;stopgain
17	29585419	C	T	1923	1	1	0	1	null	NF1	NA	Noonan syndrome & neurofibromatosis 1	19845691	exonic;nonsynonymous
17	29592358	G	A	1923	1	1	0	1	null	NF1	NA	Neurofibromatosis 1	17311297	splicing
17	29653237	G	A	1915	9	9	0	1	rs17887014	NF1	NA	Neurofibromatosis 1	15060124	exonic;synonymous
17	29677184	C	T	1919	5	5	0	1	rs17884859	NF1	NA	Neurofibromatosis 1	10712197	intronic
17	33904939	T	A	1916	8	8	0	1	R34S	PEX12_HUMAN	Yes	(in peroxisome biogenesis disorder complementation group 3; Zellweger spectrum).	NA	exonic;nonsynonymous
17	37822174	C	T	1910	14	14	0	1	rs45578741	TCAP	NA	Cardiomyopathy, hypertrophic	19035361	exonic;nonsynonymous
17	39739598	C	T	1922	2	2	0	1	R388H	K1C14_HUMAN	Yes	(in epidermolysis bullosa simplex Weber-Cockayne type; dbSNP:rs58645163).	NA	exonic;nonsynonymous
17	40001630	G	A	1922	2	2	0	1	null	KLHL10	NA	Oligozoospermia	17047026	exonic;nonsynonymous
17	40693092	C	T	1923	1	1	0	1	rs104894592	NAGLU	NA	Sanfilippo syndrome B	NA	exonic;stopgain
17	40695973	G	A	1922	2	2	0	1	G650E	ANAG_HUMAN	Yes	(in mucopolysaccharidosis type 3B [recessive?]).	NA	exonic;nonsynonymous
17	41061405	C	T	1923	1	1	0	1	P178S	G6PC_HUMAN	Yes	(in glycogen storage disease type 1A).	NA	exonic;nonsynonymous
17	41219694	C	A	1922	2	2	0	1	rs80357087	BRCA1	NA	Breast and/or ovarian cancer	15184261	exonic;nonsynonymous
17	41223021	G	A	1923	1	1	0	1	rs80357048	BRCA1	NA	Ovarian cancer	7939630	exonic;nonsynonymous
17	41234451	G	A	1923	1	1	0	1	rs41293455	BRCA1	NA	Breast cancer	7894491	exonic;stopgain
17	41243840	A	C	1923	1	1	0	1	rs28897687	BRCA1	NA	Breast and/or ovarian cancer	10528853	exonic;nonsynonymous
17	41246037	C	T	1922	2	2	0	1	rs56272539	BRCA1	NA	Breast and/or ovarian cancer	20858050	exonic;nonsynonymous
17	41246812	A	C	1923	1	1	0	1	rs28897675	BRCA1	NA	Breast cancer	15300854	exonic;nonsynonymous
17	42338993	C	T	1899	25	25	0	1	rs45562031	SLC4A1	NA	Spherocytosis	8471774	exonic;nonsynonymous
17	42463054	G	C	1896	28	28	0	1	rs76066357	ITGA2B	NA	Glanzmann thrombasthenia	17488698	exonic;nonsynonymous
17	42979917	A	C	1919	5	5	0	1	null	CCDC103	NA	Primary ciliary dyskinesia	22581229	exonic;nonsynonymous
17	42990750	C	G	1923	1	1	0	1	E223Q	GFAP_HUMAN	Yes	(in Alexander disease; adult form; dbSNP:rs56679084).	NA	exonic;nonsynonymous
17	44087797	G	A	1923	1	1	0	1	rs63751443	MAPT	NA	Frontotemporal dementia	12615641	intronic
17	48245014	C	T	1923	1	1	0	1	R77C	SGCA_HUMAN	Yes	(in limb-girdle muscular dystrophy type 2D [recessive?]; dbSNP:rs28933693).	NA	exonic;nonsynonymous
17	48269390	G	T	1911	13	13	0	1	rs66592376	COL1A1	NA	Osteogenesis imperfecta	16879195	intronic
17	48275339	G	C	1916	8	8	0	1	rs72667032	COL1A1	NA	Low bone density	8079666	exonic;nonsynonymous
17	49239105	A	G	1923	1	1	0	1	rs121917887	NME1	NA	Neuroblastoma	8047138	exonic;nonsynonymous
17	56290344	T	C	1919	5	5	0	1	rs151023718	MKS1	NA	Bardet-Biedl syndrome	18327255	exonic;splicing;nonsynonymous
17	56348226	T	G	1912	12	12	0	1	rs35897051	MPO	NA	Myeloperoxidase deficiency	15108282	splicing
17	56355397	G	A	1898	26	24	1	0.157341	rs28730837	MPO	NA	Myeloperoxidase deficiency	15108282	exonic;nonsynonymous
17	56356502	A	G	1899	25	25	0	1	M251T	PERM_HUMAN	Yes	(in myeloperoxidase deficiency [recessive?]; dbSNP:rs56378716).	NA	exonic;nonsynonymous
17	59937223	G	C	1922	2	2	0	1	P47A	FANCJ_HUMAN	Yes	(in breast cancer; early onset; loss of ATPase and helicase activities; dbSNP:rs28903098).	NA	exonic;nonsynonymous
17	61566422	G	A	1923	1	1	0	1	null	ACE	NA	Renal tubular dysgenesis	22095942	exonic;nonsynonymous
17	61995451	T	C	1921	3	3	0	1	N73D	SOMA_HUMAN	Yes	(in growth hormone deficiency isolated type 1B [recessive?]; reduced ability to activate the JAK/STAT pathway).	NA	exonic;splicing;nonsynonymous
17	62034557	C	T	1912	12	12	0	1	V781I	SCN4A_HUMAN	Yes	(in periodic paralysis hyperkalemic [dominant?] and periodic paralysis normokalemic).	NA	exonic;nonsynonymous
17	62476451	C	G	1912	12	12	0	1	rs17850455	POLG2	NA	Mitochondrial disease	21555342	exonic;nonsynonymous
17	62479069	A	C	1923	1	1	0	1	rs61751983	POLG2	NA	Mitochondrial disease	21555342	exonic;nonsynonymous
17	62492630	G	C	1923	1	1	0	1	rs149446102	POLG2	NA	Mitochondrial disease	21555342	exonic;nonsynonymous
17	72758167	G	A	1914	10	10	0	1	R153Q	NHRF1_HUMAN	Yes	(in hypophosphatemic nephrolithiasis/osteoporosis type 2; the mutant expressed in cultured renal cells increases the generation of cAMP by PTH and inhibits phosphate transport; dbSNP:rs41282065).	NA	exonic;nonsynonymous
17	78078341	T	G	1914	10	10	0	1	null	GAA	NA	Glycogen storage disease 2	7881425	intronic
17	79892807	C	T	1923	1	1	0	1	rs139751598	PYCR1	NA	Cutis laxa, autosomal recessive	19648921	exonic;nonsynonymous
18	2925359	C	T	1906	18	18	0	1	rs61735393	LPIN2	NA	Psoriasis	NA	exonic;nonsynonymous
18	2929103	G	A	1923	1	1	0	1	rs104895500	LPIN2	NA	Psoriasis	NA	exonic;nonsynonymous
18	2937699	T	C	1917	7	7	0	1	rs104895501	LPIN2	NA	Psoriasis	NA	exonic;nonsynonymous
18	2937815	G	A	1922	2	2	0	1	rs34676691	LPIN2	NA	Psoriasis	NA	exonic;nonsynonymous
18	3457439	A	T	1923	1	1	0	1	Q236L	TGIF1_HUMAN	Yes	(in holoprosencephaly type 4).	NA	exonic;nonsynonymous
18	13885297	C	A	1923	1	1	0	1	rs104894658	MC2R	NA	Glucocorticoid deficiency	8094489	exonic;nonsynonymous
18	21118536	G	A	1923	1	1	0	1	S1004L	NPC1_HUMAN	Yes	(in Niemann-Pick disease type C1).	NA	exonic;nonsynonymous
18	21124448	C	T	1923	1	1	0	1	V664M	NPC1_HUMAN	Yes	(in Niemann-Pick disease type C1).	NA	exonic;nonsynonymous
18	21140411	T	C	1918	6	6	0	1	N222S	NPC1_HUMAN	Yes	(in Niemann-Pick disease type C1; dbSNP:rs55680026).	NA	exonic;nonsynonymous
18	21513888	C	T	1923	1	1	0	1	rs61752346	LAMA3	NA	Epidermolysis bullosa, junctional	11810295	exonic;nonsynonymous
18	24442537	C	G	1923	1	1	0	1	rs150587304	AQP4	NA	Neuromyelitis optica	21900637	exonic;nonsynonymous
18	28650748	A	C	1919	5	5	0	1	rs151024019	DSC2	NA	Arrhythmogenic right ventricular dysplasia/cardiomyopathy	20031616	exonic;nonsynonymous
18	28672114	C	T	1919	5	5	0	1	rs144799937	DSC2	NA	Arrhythmogenic right ventricular dysplasia/cardiomyopathy	17963498	exonic;nonsynonymous
18	29101156	T	G	1905	19	19	0	1	rs191143292	DSG2	NA	Cardiomyopathy, arrhythmogenic right ventricular	17105751	exonic;nonsynonymous
18	29122618	G	A	1779	145	129	8	0.242662	rs79241126	DSG2	NA	Cardiomyopathy, arrhythmogenic right ventricular	16774985	exonic;nonsynonymous
18	29126108	T	G	1909	15	15	0	1	rs142841727	DSG2	NA	Cardiomyopathy, arrhythmogenic right ventricular	17105751	exonic;nonsynonymous
18	55226380	C	T	1922	2	2	0	1	rs118204037	FECH	NA	Protoporphyria, erythropoietic	1755842	exonic;nonsynonymous
18	55238725	T	C	1920	4	4	0	1	rs141813907	FECH	NA	Protoporphyria, erythropoietic	NA	exonic;nonsynonymous
18	55247314	G	C	1917	7	7	0	1	P62R	HEMH_HUMAN	Yes	(in erythropoietic protoporphyria).	NA	exonic;nonsynonymous
18	55247336	C	A	1895	29	29	0	1	G55C	HEMH_HUMAN	Yes	(in erythropoietic protoporphyria; dbSNP:rs3848519).	NA	exonic;nonsynonymous
18	58039248	G	A	1923	1	1	0	1	rs13447329	MC4R	NA	Obesity, autosomal dominant	10199800	exonic;nonsynonymous
19	856130	C	T	1902	22	22	0	1	rs17216663	ELANE	NA	Neutropaenia, congenital	18043239	exonic;nonsynonymous
19	2251247	A	G	1923	1	1	0	1	rs140765565	AMH	NA	Persistent Mullerian ducts syndrome	1483695	exonic;nonsynonymous
19	2435150	C	T	1893	31	31	0	1	R215Q	LMNB2_HUMAN	Yes	(in partial acquired lipodystrophy; dbSNP:rs61726481).	NA	exonic;nonsynonymous
19	5831634	G	T	1917	7	7	0	1	rs145035679	FUT6	NA	Fucosyltransferase deficiency	8175676	exonic;stopgain
19	5831840	C	T	1845	79	77	1	1	rs17855739	FUT6	NA	Fucosyltransferase deficiency	8175676	exonic;nonsynonymous
19	7125518	C	T	1912	12	12	0	1	rs1799816	INSR	NA	Diabetes, NIDDM	2040394	exonic;nonsynonymous
19	7997576	G	T	1918	6	6	0	1	rs139625465	TIMM44	NA	Oncocytic thyroid carcinoma	17088905	exonic;nonsynonymous
19	11221457	G	C	1064	860	488	186	0.434465	null	LDLR	NA	Hypercholesterolaemia	14974088	intronic
19	11224181	C	T	1063	861	487	187	0.473999	null	LDLR	NA	Hypercholesterolaemia	8872473	intronic
19	11227525	G	A	1923	1	1	0	1	rs17248882	LDLR	NA	Hypercholesterolaemia	10206683	intronic
19	11231203	G	A	1899	25	25	0	1	rs72658867	LDLR	NA	Hypercholesterolaemia	10208479	intronic
19	11240278	G	A	1922	2	2	0	1	null	LDLR	NA	Hypercholesterolaemia	1301956	exonic;nonsynonymous
19	11488725	G	A	1920	4	4	0	1	P488S	EPOR_HUMAN	Yes	(in erythrocytosis familial type 1 [dominant?]).	NA	exonic;nonsynonymous
19	12760746	G	A	1923	1	1	0	1	rs80338680	MAN2B1	NA	Mannosidosis, alpha	9758606	exonic;nonsynonymous
19	12766507	C	G	1923	1	1	0	1	rs80338677	MAN2B1	NA	Mannosidosis, alpha	9915946	splicing
19	13007063	G	C	1921	3	3	0	1	R227P	GCDH_HUMAN	Yes	(in glutaric aciduria type 1 [recessive?]).	NA	exonic;nonsynonymous
19	13007240	G	A	1923	1	1	0	1	null	GCDH	NA	Glutaricacidaemia I	18683078	intronic
19	13008632	G	A	1923	1	1	0	1	V400M	GCDH_HUMAN	Yes	(in glutaric aciduria type 1 [recessive?]).	NA	exonic;nonsynonymous
19	13051246	C	T	1923	1	1	0	1	rs149740908	CALR	NA	Schizoaffective disorder	19760677	exonic;nonsynonymous
19	13397560	C	T	1717	207	179	14	0.314732	rs16027	CACNA1A	NA	Epilepsy, idiopathic	21703448	exonic;nonsynonymous
19	13428124	C	T	1916	8	8	0	1	rs41276886	CACNA1A	NA	Episodic ataxia 2	17292920	exonic;nonsynonymous
19	15289686	C	A	1923	1	1	0	1	null	NOTCH3	NA	White matter lesions	22006983	exonic;nonsynonymous
19	15299048	G	A	1914	10	10	0	1	rs114207045	NOTCH3	NA	White matter lesions	22006983	exonic;nonsynonymous
19	15302999	G	C	1923	1	1	0	1	null	NOTCH3	NA	CADASIL	19542611	exonic;nonsynonymous
19	17571489	C	T	1921	3	3	0	1	rs150719211	NXNL1	NA	Leber congenital amaurosis	17249548	exonic;nonsynonymous
19	17945696	C	T	1903	21	21	0	1	rs3213409	JAK3	NA	Immunodeficiency, severe combined	10982185	exonic;nonsynonymous
19	17947980	G	A	1923	1	1	0	1	null	JAK3	NA	Immunodeficiency, severe combined	9753072	exonic;nonsynonymous
19	17953950	G	C	1916	8	8	0	1	rs55778349	JAK3	NA	Immunodeficiency, severe combined	10982185	exonic;nonsynonymous
19	18186618	T	C	1316	608	406	101	0.456423	rs11575934	IL12RB1	NA	Mycobacterial infection	9603732	exonic;nonsynonymous
19	33333154	C	T	1923	1	1	0	1	A382T	BAT1_HUMAN	Yes	(in non-type I cystinuria [recessive?]).	NA	exonic;nonsynonymous
19	33334775	C	T	1923	1	1	0	1	A354T	BAT1_HUMAN	Yes	(in non-type I cystinuria [recessive?]; type III; severe loss of amino acid transport activity).	NA	exonic;nonsynonymous
19	33334874	C	T	1905	19	19	0	1	rs45628833	SLC7A9	NA	Cystinuria, type I/III	12371955	intronic
19	33349351	C	T	1888	36	36	0	1	rs61730903	SLC7A9	NA	Cystinuria	21255007	exonic;synonymous
19	33353427	C	T	1913	11	11	0	1	A182T	BAT1_HUMAN	Yes	(in non-type I cystinuria [recessive?]; type III; frequent mutation; mild loss of amino acid transport activity).	NA	exonic;nonsynonymous
19	33517515	C	T	1808	116	104	6	0.150448	rs28626308	RHPN2	NA	Colorectal cancer, increased risk, association with	21531788	exonic;nonsynonymous
19	34262922	C	T	1914	10	10	0	1	null	CHST8	NA	Peeling skin syndrome, type A	22289416	exonic;nonsynonymous
19	35524836	G	A	1911	13	13	0	1	null	scn1bb	NA	Brugada syndrome / lone atrial fibrillation	22155598	exonic;nonsynonymous
19	35524944	G	C	1639	285	247	19	0.701311	rs67486287	scn1bb	NA	Epilepsy, idiopathic	21703448	exonic;nonsynonymous
19	35773328	C	T	1915	9	9	0	1	rs142126068	HAMP	NA	Haemochromatosis, HFE related	19286879	upstream
19	35775902	G	A	1919	5	5	0	1	G71D	HEPC_HUMAN	Yes	(in hemochromatosis type 2B [recessive?]).	NA	exonic;nonsynonymous
19	36247851	G	A	1923	1	1	0	1	rs11549029	HSPB6	NA	Impaired cardioprotective effects	18790732	exonic;nonsynonymous
19	36340187	G	C	1889	35	35	0	1	rs34982899	NPHS1	NA	Congenital nephrotic syndrome, Finnish type	11854170	exonic;nonsynonymous
19	36340506	A	C	1923	1	1	0	1	rs115333628	NPHS1	NA	Congenital nephrotic syndrome, Finnish type	12495287	exonic;nonsynonymous
19	36341311	T	A	1905	19	19	0	1	rs145125791	NPHS1	NA	Focal segmental glomerulosclerosis	11854170	exonic;nonsynonymous
19	38965975	A	G	1911	13	13	0	1	rs137933390	RYR1	NA	Malignant hyperthermia	20142353	exonic;nonsynonymous
19	38968461	C	T	1922	2	2	0	1	null	RYR1	NA	Myopathy, congenital	20839240	exonic;nonsynonymous
19	38973933	A	G	1922	2	2	0	1	rs146429605	RYR1	NA	Malignant hyperthermia	20681998	exonic;nonsynonymous
19	39009932	G	A	1923	1	1	0	1	rs137932199	RYR1	NA	Multiminicore/minicore/multicore disease	21674524	exonic;nonsynonymous
19	39034191	A	G	1923	1	1	0	1	rs147136339	RYR1	NA	Malignant hyperthermia	18564801	exonic;nonsynonymous
19	39057626	G	C	1914	10	10	0	1	rs150396398	RYR1	NA	Myopathy, progressive axial with cataracts	NA	exonic;splicing;nonsynonymous
19	39207742	G	A	1899	25	25	0	1	null	ACTN4	NA	Glomerulosclerosis, focal and segmental	21680739	exonic;nonsynonymous
19	41920030	C	T	1905	19	19	0	1	rs34442879	BCKDHA	NA	Maple syrup urine disease	12118532	exonic;nonsynonymous
19	42364385	G	T	1913	11	11	0	1	null	RPS19	NA	Diamond-Blackfan anaemia	10590074	intronic
19	42365089	A	G	1920	4	4	0	1	null	RPS19	NA	Diamond-Blackfan anaemia	12750732	intronic
19	42373302	G	C	1894	30	30	0	1	rs61762294	RPS19	NA	Diamond-Blackfan anaemia	10590074	intronic
19	45412031	C	A	1911	13	13	0	1	null	APOE	NA	Hyperlipidaemia	15256764	exonic;nonsynonymous
19	45855507	G	C	1923	1	1	0	1	rs144564120	ERCC2	NA	Xeroderma pigmentosum	7585650	exonic;nonsynonymous
19	45856059	C	G	1923	1	1	0	1	null	ERCC2	NA	Trichothiodystrophy	7920640	exonic;nonsynonymous
19	45860626	G	C	1923	1	1	0	1	rs121913016	ERCC2	NA	Xeroderma pigmentosum	7849702	exonic;nonsynonymous
19	46269324	G	A	1920	4	4	0	1	T552M	SIX5_HUMAN	Yes	(in branchiootorenal syndrome type 2 [dominant?]; affects Eya1 binding and the ability to activate gene transcription).	NA	exonic;nonsynonymous
19	46271631	C	T	1922	2	2	0	1	A158T	SIX5_HUMAN	Yes	(in branchiootorenal syndrome type 2 [dominant?]; affects Eya1 binding and the ability to activate gene transcription).	NA	exonic;nonsynonymous
19	47259134	C	A	1913	11	11	0	1	rs148206382	FKRP	NA	Muscular dystrophy, limb girdle	11741828	exonic;nonsynonymous
19	47259585	C	T	1923	1	1	0	1	null	FKRP	NA	Muscular dystrophy, limb girdle	14647208	exonic;nonsynonymous
19	48339595	G	A	1923	1	1	0	1	rs61748438	CRX	NA	Leber congenital amaurosis	16123401	exonic;nonsynonymous
19	48342749	A	G	1923	1	1	0	1	rs61748442	CRX	NA	Leber congenital amaurosis	16123401	exonic;nonsynonymous
19	49206524	C	T	1922	2	2	0	1	rs149356814	FUT2	NA	Fucosyltransferase deficiency	17176328	exonic;nonsynonymous
19	49206625	C	T	1900	24	24	0	1	rs1800022	FUT2	NA	Fucosyltransferase deficiency	9760207	exonic;nonsynonymous
19	49206631	A	T	1923	1	1	0	1	rs1047781	FUT2	NA	Fucosyltransferase deficiency	8755920	exonic;nonsynonymous
19	49564992	G	A	1918	6	6	0	1	rs61732310	NTF4	NA	Glaucoma, primary open angle	19765683	exonic;nonsynonymous
19	50334047	C	T	1907	17	17	0	1	rs145770066	MED25	NA	Charcot-Marie-Tooth disease, 2B2	19290556	exonic;nonsynonymous
19	50747534	G	T	1922	2	2	0	1	rs119103280	MYH14	NA	Hearing impairment	15015131	exonic;nonsynonymous
19	55447783	G	C	1923	1	1	0	1	P716A	NALP7_HUMAN	Yes	(in hydatidiform mole).	NA	exonic;nonsynonymous
19	55451720	C	T	1896	28	28	0	1	rs61746625	NLRP7	NA	Hydatidiform mole	19066229	exonic;nonsynonymous
19	55543660	G	A	1922	2	2	0	1	null	GP6	NA	Absence of collagen-induced platelet activation	19549989	exonic;nonsynonymous
19	55667607	G	A	1923	1	1	0	1	rs77615401	TNNI3	NA	Cardiomyopathy, hypertrophic	11815426	exonic
20	1961091	G	A	1923	1	1	0	1	null	PDYN	NA	Spinocerebellar ataxia 23	21035104	exonic;nonsynonymous
20	3063784	C	A	1923	1	1	0	1	G54V	NEU2_HUMAN	Yes	(in autosomal dominant neurohypophyseal diabetes insipidus [dominant?]).	NA	exonic;nonsynonymous
20	3209500	C	T	1923	1	1	0	1	rs143965185	SLC4A11	NA	Corneal dystrophy, Fuchs endothelial	20848555	exonic;nonsynonymous
20	3214799	C	G	1923	1	1	0	1	rs141836046	SLC4A11	NA	Corneal dystrophy, Fuchs endothelial	20848555	exonic;nonsynonymous
20	3870181	C	A	1708	216	212	2	0.000276522	null	PANK2	NA	Pantothenate kinase-associated neurodegeneration	16758184	exonic;stopgain
20	5283323	A	C	1918	6	6	0	1	L173R	PKR2_HUMAN	Yes	(in Kallmann syndrome type 3).	NA	exonic;nonsynonymous
20	10386134	C	T	1920	4	4	0	1	rs142327258	MKKS	NA	Bardet-Biedl syndrome	12920096	exonic;nonsynonymous
20	10389422	T	C	1916	8	8	0	1	rs145342800	MKKS	NA	Bardet-Biedl syndrome	12107442	exonic;nonsynonymous
20	10393439	C	A	1915	9	9	0	1	rs74315394	MKKS	NA	McKusick-Kaufman syndrome	10802661	exonic;nonsynonymous
20	10622214	C	T	1916	8	8	0	1	R937Q	JAG1_HUMAN	Yes	(in Alagille syndrome type 1 [dominant?]).	NA	exonic;nonsynonymous
20	22562879	G	A	1914	10	10	0	1	null	FOXA2	NA	Diabetes, early-onset, MODY	10672453	exonic;nonsynonymous
20	23030443	G	T	1923	1	1	0	1	null	THBD	NA	Myocardial infarction	9236408	upstream
20	25058398	T	C	1906	18	18	0	1	rs148957473	VSX1	NA	Keratoconus	11978762	exonic;nonsynonymous
20	32000520	G	C	1916	8	8	0	1	A257G	SNTA1_HUMAN	Yes	(in long QT syndrome type 12; leads to a gain of function of the voltage dependent sodium channel).	NA	exonic;nonsynonymous
20	33519783	G	A	1923	1	1	0	1	R330C	GSHB_HUMAN	Yes	(in glutathione synthetase deficiency).	NA	exonic;nonsynonymous
20	43048414	G	A	1923	1	1	0	1	rs139779712	HNF4A	NA	Diabetes, MODY1	9267996	exonic;nonsynonymous
20	43058267	A	G	1923	1	1	0	1	rs147638455	HNF4A	NA	Diabetes mellitus, type 2	10227563	exonic;nonsynonymous
20	43254303	C	T	1923	1	1	0	1	rs121908731	ADA	NA	Adenosine deaminase deficiency	10200056	exonic;nonsynonymous
20	61448466	G	A	1503	421	323	49	0.571956	rs2294984	COL9A3	NA	Pseudoachondroplasia	21042783	exonic;nonsynonymous
21	15561623	C	T	1920	4	4	0	1	rs11909217	LIPI	NA	Hypertriglyceridaemia	12719377	exonic;nonsynonymous
21	27543619	C	T	1921	3	3	0	1	rs187510057	APP	NA	Alzheimer disease	16685645	upstream
21	33040849	T	A	1923	1	1	0	1	rs143100660	SOD1	NA	Amyotrophic lateral sclerosis	16674979	exonic;synonymous
21	35821641	G	A	1923	1	1	0	1	null	KCNE1	NA	Long QT syndrome	10973849	exonic;nonsynonymous
21	35821680	C	T	1910	14	14	0	1	rs1805128	KCNE1	NA	Long QT syndrome, drug-induced	14760488	exonic;nonsynonymous
21	36252995	C	G	1923	1	1	0	1	null	RUNX1	NA	Platelet disorder, familial	18723428	exonic;nonsynonymous
21	43795896	C	T	1920	4	4	0	1	rs56264519	TMPRSS3	NA	Hearing loss, non-syndromic	21786053	exonic;nonsynonymous
21	43808545	G	T	1922	2	2	0	1	rs147231991	TMPRSS3	NA	Deafness, childhood onset	16283880	exonic;nonsynonymous
21	44317065	G	A	1921	3	3	0	1	rs145030239	NDUFV3	NA	Complex I deficiency	20818383	exonic;nonsynonymous
21	44317156	A	C	1910	14	14	0	1	rs141922962	NDUFV3	NA	Complex I deficiency	20818383	exonic;splicing;nonsynonymous
21	44480591	G	A	1923	1	1	0	1	rs117687681	CBS	NA	Homocystinuria	9361025	exonic;nonsynonymous
21	44485366	T	C	1923	1	1	0	1	null	CBS	NA	Homocystinuria	14635102	exonic;nonsynonymous
21	45713715	C	T	1920	4	4	0	1	rs72650677	AIRE	NA	Systemic sclerosis with autoimmune thyroiditis	17101293	exonic;nonsynonymous
21	45714333	G	A	1923	1	1	0	1	null	AIRE	NA	APECED	12843157	exonic;nonsynonymous
21	46309312	G	A	1912	12	12	0	1	rs5030672	ITGB2	NA	Leukocyte adhesion deficiency	1346613	exonic;nonsynonymous
21	47419104	A	C	1923	1	1	0	1	K571T	CO6A1_HUMAN	Yes	(in Bethlem myopathy [dominant?]).	NA	exonic;nonsynonymous
21	47532093	G	A	1916	8	8	0	1	E106K	CO6A2_HUMAN	Yes	(in Bethlem myopathy [dominant?]).	NA	exonic;nonsynonymous
21	47545696	C	A	1919	5	5	0	1	null	COL6A2	NA	Bethlem myopathy	15689448	intronic
21	47546080	G	A	1914	10	10	0	1	R784H	CO6A2_HUMAN	Yes	(in Ullrich congenital muscular dystrophy [recessive?]).	NA	exonic;nonsynonymous
21	47552201	C	T	1900	24	22	1	0.135175	P932L	CO6A2_HUMAN	Yes	(in Bethlem myopathy [dominant?]; results in reduced intracellular collagen VI assembly and secretion).	NA	exonic;nonsynonymous
21	47809112	A	G	1923	1	1	0	1	null	PCNT	NA	Microcephalic osteodysplastic primordial dwarfism type 2	19643772	splicing
22	18566288	C	G	1891	33	33	0	1	rs12484657	PEX26	NA	Peroxisome biogenesis disorder	16257970	exonic;nonsynonymous
22	18905934	A	G	1918	6	6	0	1	rs2904551	PRODH	NA	Increased proline level in schizophrenia	12217952	exonic;nonsynonymous
22	18909902	A	T	1906	18	18	0	1	rs137852934	PRODH	NA	Increased proline level in schizophrenia	12217952	exonic;nonsynonymous
22	21134223	G	A	1922	2	2	0	1	rs5907	SERPIND1	NA	Heparin cofactor 2 deficiency	2647747	exonic;nonsynonymous
22	24432578	T	G	1923	1	1	0	1	null	CABIN1	NA	Schwannomatosis	16287142	exonic;nonsynonymous
22	24916355	C	A	1922	2	2	0	1	null	UPB1	NA	Beta-ureidopropionase deficiency	22525402	exonic;splicing;nonsynonymous
22	24919586	G	A	1918	6	6	0	1	null	UPB1	NA	Ureidopropionase deficiency	11783491	splicing
22	30639993	C	T	1913	11	11	0	1	rs41281637	LIF	NA	Female infertility	10341007	exonic;nonsynonymous
22	30642690	G	T	1921	3	3	0	1	null	LIF	NA	Female infertility	10341007	UTR5
22	32439303	C	T	1922	2	2	0	1	rs150288967	SLC5A1	NA	Glucose / galactose malabsorption	12139397	exonic;nonsynonymous
22	32871054	C	T	1922	2	2	0	1	rs121918305	FBXO7	NA	Parkinsonian-pyramidal syndrome	19038853	exonic;nonsynonymous
22	36682873	A	G	1919	5	5	0	1	rs142094977	MYH9	NA	MYH9 related disease	19557653	exonic;nonsynonymous
22	37333657	C	A	1831	93	89	2	1	rs1801122	CSF2RB	NA	Pulmonary alveolar proteinosis	9410898	exonic;nonsynonymous
22	40760969	G	A	1923	1	1	0	1	R426H	PUR8_HUMAN	Yes	(in adenylosuccinase deficiency [recessive?]; severe. Most frequent mutation).	NA	exonic;nonsynonymous
22	41077613	G	A	1913	11	11	0	1	rs45439291	MCHR1	NA	Obesity	15166293	exonic;nonsynonymous
22	42457056	C	T	1917	7	7	0	1	rs121434529	NAGA	NA	Neuroaxonal dystrophy, infantile	2243144	exonic;nonsynonymous
22	42524817	C	T	1910	14	14	0	1	rs139779104	CYP2D6	NA	Cytochrome P450 deficiency	7868129	exonic;nonsynonymous
22	45691554	C	T	1918	6	6	0	1	P273L	UPK3A_HUMAN	Yes	(in renal adysplasia; with severe vesicoureteric reflux; normal targeting to the cell surface).	NA	exonic;nonsynonymous
22	46731689	G	T	1716	208	184	12	0.739187	rs11090865	TRMU	NA	Phenotype modifier	16826519	exonic;nonsynonymous
22	46759981	G	C	1918	6	6	0	1	null	CELSR1	NA	Craniorachischisis	22095531	exonic;nonsynonymous
22	50304114	C	T	1923	1	1	0	1	R146Q	ALG12_HUMAN	Yes	(in congenital disorder of glycosylation type 1G).	NA	exonic;nonsynonymous
22	50964255	C	T	1823	101	91	5	0.17802	rs112723255	TYMP	NA	Mitochondrial neurogastrointestinal encephalopathy	12529715	exonic;nonsynonymous
22	50965599	T	G	1923	1	1	0	1	null	TYMP	NA	Mitochondrial neurogastrointestinal encephalopathy	14720311	exonic;nonsynonymous
22	50967024	C	T	1923	1	1	0	1	rs121913037	TYMP	NA	Mitochondrial neurogastrointestinal encephalopathy	9924029	exonic;nonsynonymous
22	51063820	G	A	1923	1	1	0	1	rs28940893	ARSA	NA	Metachromatic leukodystrophy	7866401	exonic;nonsynonymous
22	51065593	C	T	1923	1	1	0	1	null	ARSA	NA	Metachromatic leukodystrophy	1670590	splicing
