# Supplementary material for: Population Genomic Analysis of 962 Whole Genome Sequences of Humans Reveals Natural Selection in Non-Coding Regions
Source: PLoS One. 2015 Mar 25;10(3):e0121644. doi: 10.1371/journal.pone.0121644 (PMC4373932; doi:10.1371/journal.pone.0121644)
Supplement: S2 Table — (XLS) [file pone.0121644.s003.xls]

## Sheet: tables7_mutation_gwas_lincRNA_f
Table S7. CHARGE mutations in non-coding RNAs overlapped with GWAS hits with the associated diseases or traits.
Host_ncRNA_Class	SNP	Chr	Position	Ref_Allele	Alt_Allele	Freq_of_Ref_Allele	Host_ncRNA_ID	P_value_in_GWAS	Literature	Phenotypic traits
lincRNA	rs10015186	chr4	132970713	G	A	0.547297	ENSG00000251598	4.35e-05	PUBMEDID:19571809	Schizophrenia
lincRNA	rs10025722	chr4	127534011	A	G	0.697505	ENSG00000249178	9.79e-05	PUBMEDID:19043545	Serum metabolites
lincRNA	rs10029005	chr4	125451364	G	A	0.621622	ENSG00000261083	5.3e-05	PUBMEDID:20125193	Cognitive test performance
lincRNA	rs1003690	chr2	60599988	T	C	0.954782	ENSG00000223929	6.8e-05	PUBMEDID:18957941	Personality dimensions
lincRNA	rs10058547	chr5	117421736	A	G	0.678274	ENSG00000249797	2e-05	PUBMEDID:20010835	Pulmonary function
lincRNA	rs10069397	chr5	65783709	T	C	0.451663	ENSG00000251391	5e-08	PUBMEDID:20595579	Longevity
lincRNA	rs10073812	chr5	38052113	C	T	0.809771	ENSG00000250003	5.76e-05	PUBMEDID:20038947	Major depressive disorder (broad)
lincRNA	rs10074757	chr5	117396992	G	C	0.560811	ENSG00000249797	1.93e-05	PUBMEDID:20010835	Pulmonary function
lincRNA	rs10088218	chr8	129543949	G	A	0.878898	ENSG00000254275	3e-09	PUBMEDID:20852632	Ovarian cancer
lincRNA	rs10103840	chr8	29419713	C	A	0.881497	ENSG00000253182	1.46e-05	PUBMEDID:19188921	Smoking behavior
lincRNA	rs10104895	chr8	61876044	G	A	0.852391	ENSG00000254777	2e-06	PUBMEDID:22424883	Pulmonary function decline
lincRNA	rs10110895	chr8	121926352	G	A	0.626819	ENSG00000253619	8.26e-05	PUBMEDID:19043545	Serum metabolites
lincRNA	rs10147870	chr14	86824930	C	T	0.649688	ENSG00000258994	9.78e-05	PUBMEDID:19043545	Serum metabolites
lincRNA	rs10150328	chr14	59380832	T	C	0.840956	ENSG00000258583	2.08e-05	PUBMEDID:19571811	Schizophrenia
lincRNA	rs10162002	chr13	24042510	G	A	0.845634	ENSG00000232977	5e-06	PUBMEDID:22493691	Hypothyroidism
lincRNA	rs1016343	chr8	128093297	C	T	0.809771	ENSG00000253264	1e-07	PUBMEDID:18264097	Prostate cancer
lincRNA	rs1016343	chr8	128093297	C	T	0.809771	ENSG00000253264	4e-10	PUBMEDID:21743057	Prostate cancer
lincRNA	rs10173352	chr2	33057389	G	A	0.398649	ENSG00000230876	2.17e-06	PUBMEDID:19270707	Nonsyndromic cleft lip with or without cleft palate
lincRNA	rs1018326	chr2	182007800	T	C	0.600312	ENSG00000234663	2e-06	PUBMEDID:20062062	Ankylosing spondylitis
lincRNA	rs10183986	chr2	67438040	G	A	0.864345	ENSG00000235885	8.21e-05	PUBMEDID:19734545	Cognitive performance
lincRNA	rs10227331	chr7	157294938	T	A	0.538981	ENSG00000223872	4e-06	PUBMEDID:18821565	Inattentive symptoms
lincRNA	rs10231898	chr7	68718888	C	T	0.484407	ENSG00000225718	3.36e-05	PUBMEDID:19043545	Serum metabolites
lincRNA	rs10250140	chr7	68718752	T	C	0.360707	ENSG00000225718	4.17e-06	PUBMEDID:19043545	Serum metabolites
lincRNA	rs10270301	chr7	110133558	C	T	0.735447	ENSG00000226965	8.6e-05	PUBMEDID:19684573	Response to hepatitis C treatment
lincRNA	rs1027643	chr5	91893792	C	T	0.941788	ENSG00000249776	5e-10	PUBMEDID:22544364	Wilms tumor
lincRNA	rs1036810	chr15	87987851	G	C	0.411123	ENSG00000259560	3.22e-05	PUBMEDID:19043545	Serum metabolites
lincRNA	rs1037757	chr18	56752054	G	C	0.980769	ENSG00000267215	8e-06	PUBMEDID:22005931	Alzheimer`s disease (age of onset)
lincRNA	rs1039002	chr6	166155457	G	A	0.952183	ENSG00000256956	2e-08	PUBMEDID:22205951	Bipolar disorder
lincRNA	rs10451103	chr16	18094687	A	C	0.586798	ENSG00000259929	7.67e-05	PUBMEDID:20125193	Cognitive test performance
lincRNA	rs10482991	chr21	29817710	C	G	0.285863	ENSG00000232855	3.9e-05	PUBMEDID:19043545	Serum metabolites
lincRNA	rs10484128	chr14	98642572	C	T	0.85447	ENSG00000259097	6e-06	PUBMEDID:17903294	Hemostatic factors and hematological phenotypes
lincRNA	rs10484679	chr6	148266449	G	A	0.861227	ENSG00000227681	3.71e-05	PUBMEDID:20125193	Cognitive test performance
lincRNA	rs10485165	chr6	89112817	C	T	0.845114	ENSG00000234426	1e-06	PUBMEDID:17903293	Select biomarker traits
lincRNA	rs10487592	chr7	7307465	A	G	0.93763	ENSG00000230825	6e-05	PUBMEDID:19448189	Response to lithium treatment in bipolar disorder
lincRNA	rs10488908	chr21	22982833	A	T	0.931913	ENSG00000234730	2.57e-05	PUBMEDID:19084217	Serum markers of iron status
lincRNA	rs10489087	chr4	13794416	G	A	0.881497	ENSG00000250634	5e-06	PUBMEDID:17903294	Hemostatic factors and hematological phenotypes
lincRNA	rs10495809	chr2	34305257	G	A	0.636175	ENSG00000203386	3e-10	PUBMEDID:19421330	Hypertension (young onset)
lincRNA	rs10499504	chr7	17561583	A	G	0.836279	ENSG00000226598	4e-07	PUBMEDID:20195266	Response to antipsychotic treatment
lincRNA	rs10501726	chr11	90375895	T	A	0.894491	ENSG00000261645	4.3e-05	PUBMEDID:18957941	Personality dimensions
lincRNA	rs10502457	chr18	22375671	C	T	0.768711	ENSG00000266573	2.23e-05	PUBMEDID:19846067	Response to citalopram treatment
lincRNA	rs10503951	chr8	33665680	A	G	0.926195	ENSG00000253642	3e-09	PUBMEDID:22542470	Immune response to smallpox vaccine
lincRNA	rs10506701	chr12	74586210	T	G	0.805094	ENSG00000251138	1e-06	PUBMEDID:17903296	Bone mineral density
lincRNA	rs10508250	chr10	3290142	C	T	0.918399	ENSG00000226762	7.62e-05	PUBMEDID:19107115	Major depressive disorder
lincRNA	rs10512674	chr5	38056753	A	C	0.809771	ENSG00000250003	6.74e-05	PUBMEDID:20038947	Major depressive disorder (broad)
lincRNA	rs10520045	chr15	36313965	G	T	0.705821	ENSG00000259639	7e-06	PUBMEDID:20673876	Major depressive disorder
lincRNA	rs10739891	chr9	98427543	C	A	0.574324	ENSG00000228142	6.77e-05	PUBMEDID:20125193	Cognitive test performance
lincRNA	rs10773338	chr12	127404403	G	A	0.167879	ENSG00000249345	3e-05	PUBMEDID:19169255	Psoriasis
lincRNA	rs10784600	chr12	67336812	G	A	0.855509	ENSG00000256248	6.75e-05	PUBMEDID:20125193	Cognitive test performance
lincRNA	rs10785052	chr12	73963383	T	C	0.172037	ENSG00000258109	3e-05	PUBMEDID:19772629	Parkinson`s disease (age of onset)
lincRNA	rs10785114	chr12	74794344	G	T	0.0784823	ENSG00000251138	4.81e-05	PUBMEDID:20010835	Pulmonary function
lincRNA	rs10785115	chr12	74794360	C	T	0.0784823	ENSG00000251138	4.93e-05	PUBMEDID:20010835	Pulmonary function
lincRNA	rs10805321	chr4	13914373	C	A	0.844075	ENSG00000250634	9e-06	PUBMEDID:21990027	Response to antipsychotic therapy (extrapyramidal side effects)
lincRNA	rs10818097	chr9	120626599	C	T	0.336798	ENSG00000228512	1.5e-05	PUBMEDID:19043545	Serum metabolites
lincRNA	rs10832116	chr11	13824801	T	G	0.578482	ENSG00000255411	2.37e-05	PUBMEDID:19043545	Serum metabolites
lincRNA	rs10838479	chr11	45514565	T	C	0.941788	ENSG00000254746	4.45e-05	PUBMEDID:19107115	Major depressive disorder
lincRNA	rs10842120	chr12	23258003	G	A	0.757277	ENSG00000256321	7.21e-05	PUBMEDID:19043545	Serum metabolites
lincRNA	rs10842122	chr12	23265863	T	C	0.743763	ENSG00000256321	9.42e-06	PUBMEDID:19043545	Serum metabolites
lincRNA	rs10852366	chr16	13550540	C	T	0.442308	ENSG00000262801	6.74e-05	PUBMEDID:19107115	Major depressive disorder
lincRNA	rs1085998	chr18	983188	G	A	0.908004	ENSG00000263551	1.9e-05	PUBMEDID:19060907	Fasting plasma glucose
lincRNA	rs10865035	chr2	100835734	A	G	0.489605	ENSG00000232084	2e-06	PUBMEDID:20453842	Rheumatoid arthritis
lincRNA	rs10865802	chr3	25064898	C	G	0.595634	ENSG00000237838	6.73e-06	PUBMEDID:19571809	Schizophrenia
lincRNA	rs10867840	chr9	84892263	G	A	0.335759	ENSG00000228430	9.59e-05	PUBMEDID:19571809	Schizophrenia
lincRNA	rs10867844	chr9	84986219	A	G	0.661123	ENSG00000228430	5.46e-05	PUBMEDID:19571809	Schizophrenia
lincRNA	rs10875943	chr12	49676010	T	C	0.715696	ENSG00000257960	7e-12	PUBMEDID:21743467	Prostate cancer
lincRNA	rs10888935	chr1	56060951	T	A	0.370582	ENSG00000234810	7e-07	PUBMEDID:22228203	Inflammatory biomarkers
lincRNA	rs10889990	chr1	73245168	G	A	0.988046	ENSG00000225087	5.1e-05	PUBMEDID:19465909	Malaria
lincRNA	rs10889991	chr1	73245256	G	A	0.988046	ENSG00000225087	7.7e-05	PUBMEDID:19465909	Malaria
lincRNA	rs10895692	chr11	104341165	C	T	0.357069	ENSG00000256422	8.3e-05	PUBMEDID:18957941	Personality dimensions
lincRNA	rs10921112	chr1	188997868	C	A	0.485447	ENSG00000226486	6.27e-05	PUBMEDID:19043545	Serum metabolites
lincRNA	rs10929808	chr2	12568996	G	A	0.138773	ENSG00000224184	4e-06	PUBMEDID:20889312	Bipolar disorder and schizophrenia
lincRNA	rs10936959	chr3	177591074	A	G	0.242723	ENSG00000231574	6.19e-05	PUBMEDID:19734545	Cognitive performance
lincRNA	rs10956483	chr8	130572110	G	C	0.826403	ENSG00000229140	2e-10	PUBMEDID:21738478	White blood cell types
lincRNA	rs10957183	chr8	49551144	G	C	0.363306	ENSG00000233858	8.5e-05	PUBMEDID:18957941	Personality dimensions
lincRNA	rs10958116	chr8	83541684	G	A	0.400208	ENSG00000253503	2.62e-05	PUBMEDID:19043545	Serum metabolites
lincRNA	rs11009175	chr10	33294775	G	A	0.881497	ENSG00000229656	5e-06	PUBMEDID:20800221	Depression--quantitative trait
lincRNA	rs11046795	chr12	23262095	C	G	0.742723	ENSG00000256321	1.29e-05	PUBMEDID:19043545	Serum metabolites
lincRNA	rs11047424	chr12	24560842	G	A	0.682432	ENSG00000255864	7.44e-05	PUBMEDID:19043545	Serum metabolites
lincRNA	rs11061476	chr12	131849823	G	A	0.87474	ENSG00000230294	7.4e-05	PUBMEDID:19448189	Response to lithium treatment in bipolar disorder
lincRNA	rs11071966	chr15	68163774	G	A	0.441268	ENSG00000259410	8.12e-05	PUBMEDID:20125193	Cognitive test performance
lincRNA	rs11074189	chr15	94005055	T	C	0.324844	ENSG00000257060	4.99e-05	PUBMEDID:19043545	Serum metabolites
lincRNA	rs11077594	chr17	70048025	T	C	0.716216	ENSG00000254148	9.53e-05	PUBMEDID:19043545	Serum metabolites
lincRNA	rs11090507	chr22	28105851	G	A	0.739605	ENSG00000227838	7.49e-05	PUBMEDID:19043545	Serum metabolites
lincRNA	rs11117970	chr1	218072745	A	C	0.70842	ENSG00000231814	5.38e-05	PUBMEDID:19043545	Serum metabolites
lincRNA	rs11129184	chr3	25172600	A	G	0.466736	ENSG00000237838	3.88e-05	PUBMEDID:19043545	Serum metabolites
lincRNA	rs11129187	chr3	25172786	G	C	0.466216	ENSG00000237838	4.07e-05	PUBMEDID:19043545	Serum metabolites
lincRNA	rs11130715	chr3	59492701	C	G	0.401767	ENSG00000242545	3.54e-05	PUBMEDID:19043545	Serum metabolites
lincRNA	rs11136971	chr8	5973842	A	G	0.376819	ENSG00000253880	3.7e-05	PUBMEDID:19772629	Parkinson`s disease (age of onset)
lincRNA	rs11138278	chr9	82133538	T	C	0.846154	ENSG00000233086	7.46e-05	PUBMEDID:18957941	Personality dimensions
lincRNA	rs11150192	chr16	79741569	C	T	0.762474	ENSG00000260876	2.8e-05	PUBMEDID:19043545	Serum metabolites
lincRNA	rs11157816	chr14	51802911	C	T	0.5842	ENSG00000258479	2.26e-05	PUBMEDID:19571809	Schizophrenia
lincRNA	rs11159770	chr14	86830693	C	T	0.548857	ENSG00000258994	7.27e-05	PUBMEDID:19043545	Serum metabolites
lincRNA	rs1117324	chr2	21840093	C	T	0.035343	ENSG00000233005	3e-07	PUBMEDID:20195266	Response to antipsychotic treatment
lincRNA	rs11176528	chr12	67397789	T	C	0.882017	ENSG00000256248	4.24e-05	PUBMEDID:19734545	Cognitive performance
lincRNA	rs11179559	chr12	73525625	C	A	0.555094	ENSG00000258294	7.05e-05	PUBMEDID:19043545	Serum metabolites
lincRNA	rs11180023	chr12	74717465	C	G	0.912682	ENSG00000251138	4.61e-05	PUBMEDID:20010835	Pulmonary function
lincRNA	rs11180032	chr12	74734460	T	G	0.924636	ENSG00000251138	5.12e-05	PUBMEDID:20010835	Pulmonary function
lincRNA	rs11186398	chr10	92723864	A	G	0.431393	ENSG00000225525	3.84e-05	PUBMEDID:19043545	Serum metabolites
lincRNA	rs11234778	chr11	86459103	C	T	0.838358	ENSG00000255250	6.94e-05	PUBMEDID:20010835	Pulmonary function
lincRNA	rs11241444	chr5	117369877	C	T	0.560811	ENSG00000249797	7.06e-05	PUBMEDID:20010835	Pulmonary function
lincRNA	rs11241446	chr5	117410931	G	C	0.559771	ENSG00000249797	1.59e-05	PUBMEDID:20010835	Pulmonary function
lincRNA	rs11249215	chr1	25297184	G	A	0.511435	ENSG00000261025	9e-11	PUBMEDID:21743469	Ankylosing spondylitis
lincRNA	rs11602353	chr11	86457164	C	T	0.836798	ENSG00000255250	8.96e-05	PUBMEDID:20010835	Pulmonary function
lincRNA	rs1160312	chr20	22050503	A	G	0.516112	ENSG00000234435	1e-14	PUBMEDID:18849991	Male-pattern baldness
lincRNA	rs11615274	chr12	73601132	C	T	0.742204	ENSG00000258123	9e-08	PUBMEDID:22417934	Body mass index and cholesterol (psychopharmacological treatment)
lincRNA	rs1164067	chr3	109466019	G	A	0.274428	ENSG00000242029	4.57e-05	PUBMEDID:19571811	Schizophrenia
lincRNA	rs11643220	chr16	81422926	G	A	0.951143	ENSG00000261609	5.03e-05	PUBMEDID:19734545	Cognitive performance
lincRNA	rs11650165	chr17	69109618	C	T	0.641892	ENSG00000260785	5.16e-05	PUBMEDID:20010835	Pulmonary function
lincRNA	rs1169146	chr14	36632769	G	A	0.424636	ENSG00000257585	3.4e-05	PUBMEDID:19043545	Serum metabolites
lincRNA	rs11752678	chr6	23127186	C	T	0.595114	ENSG00000233358	4.53e-05	PUBMEDID:19043545	Serum metabolites
lincRNA	rs11762648	chr7	85077205	C	T	0.612266	ENSG00000225128	1.7e-06	PUBMEDID:19734903	Alzheimer`s disease
lincRNA	rs11768400	chr7	85055535	A	G	0.612266	ENSG00000225128	7e-07	PUBMEDID:19734903	Alzheimer`s disease
lincRNA	rs11769386	chr7	85083869	G	C	0.609667	ENSG00000225128	8.2e-07	PUBMEDID:19734903	Alzheimer`s disease
lincRNA	rs11774028	chr8	137602505	G	A	0.977651	ENSG00000254101	5.93e-05	PUBMEDID:20125193	Cognitive test performance
lincRNA	rs11778346	chr8	16726107	T	C	0.734927	ENSG00000253496	2.29e-05	PUBMEDID:18957941	Personality dimensions
lincRNA	rs11782819	chr8	10334781	T	C	0.452183	ENSG00000253641	3e-06	PUBMEDID:20452100	Alzheimer`s disease
lincRNA	rs11786458	chr8	40252701	G	T	0.652287	ENSG00000253354	9e-06	PUBMEDID:18821565	Inattentive symptoms
lincRNA	rs11787836	chr9	128858597	T	C	0.200624	ENSG00000232413	1.4e-05	PUBMEDID:20125193	Cognitive test performance
lincRNA	rs11790994	chr9	98429266	C	G	0.899688	ENSG00000228142	2e-07	PUBMEDID:18821565	Inattentive symptoms
lincRNA	rs11802925	chr1	9228624	T	C	0.913202	ENSG00000228526	9.09e-05	PUBMEDID:19571809	Schizophrenia
lincRNA	rs11870477	chr17	67802352	A	C	0.87422	ENSG00000227517	3e-06	PUBMEDID:22569225	Response to TNF-alpha inhibitors in rheumatoid arthritis
lincRNA	rs11872385	chr18	22336276	T	G	0.774948	ENSG00000266573	8.31e-05	PUBMEDID:19846067	Response to citalopram treatment
lincRNA	rs11873656	chr18	22331765	A	C	0.755717	ENSG00000266573	1.28e-05	PUBMEDID:19846067	Response to citalopram treatment
lincRNA	rs11889862	chr2	150697148	A	G	0.225572	ENSG00000162947	2e-06	PUBMEDID:19448619	Menopause (age at onset)
lincRNA	rs11902160	chr2	3068334	C	T	0.97921	ENSG00000234423	5.26e-05	PUBMEDID:19734545	Cognitive performance
lincRNA	rs12029080	chr1	95053353	T	G	0.715696	ENSG00000223675	6e-52	PUBMEDID:21502573	D-dimer levels
lincRNA	rs12054497	chr4	19176299	C	A	0.721414	ENSG00000248238	6.25e-05	PUBMEDID:19043545	Serum metabolites
lincRNA	rs12105891	chr2	19354741	T	G	0.635655	ENSG00000236204	8.01e-05	PUBMEDID:19043545	Serum metabolites
lincRNA	rs12146113	chr1	200443118	G	A	0.798337	ENSG00000230623	4.9e-05	PUBMEDID:19772629	Parkinson`s disease (age of onset)
lincRNA	rs1225214	chr2	12335338	G	A	0.559252	ENSG00000224184	2.55e-05	PUBMEDID:19043545	Serum metabolites
lincRNA	rs12311315	chr12	73521180	C	T	0.555094	ENSG00000258294	5.53e-05	PUBMEDID:19043545	Serum metabolites
lincRNA	rs12364205	chr11	90018288	A	C	0.483888	ENSG00000261645	8.19e-05	PUBMEDID:20125193	Cognitive test performance
lincRNA	rs1240773	chr11	116520527	G	T	0.782225	ENSG00000237937	8e-06	PUBMEDID:21160409	HIV-1 susceptibility
lincRNA	rs12414191	chr10	92167756	T	C	0.464137	ENSG00000236373	1.86e-05	PUBMEDID:19043545	Serum metabolites
lincRNA	rs12422325	chr12	15155575	G	A	0.579522	ENSG00000255727	4.09e-05	PUBMEDID:20125193	Cognitive test performance
lincRNA	rs12423438	chr12	74738165	C	T	0.925156	ENSG00000251138	4.96e-05	PUBMEDID:20010835	Pulmonary function
lincRNA	rs12424603	chr12	74728764	A	G	0.912682	ENSG00000251138	5.22e-05	PUBMEDID:20010835	Pulmonary function
lincRNA	rs12431733	chr14	54290830	T	C	0.454262	ENSG00000235269	3e-06	PUBMEDID:19915575	Parkinson`s disease
lincRNA	rs12454307	chr18	59294347	T	C	0.799896	ENSG00000267175	7.18e-05	PUBMEDID:20038947	Major depressive disorder (broad)
lincRNA	rs12470944	chr2	6100997	A	G	0.74896	ENSG00000232044	4.24e-05	PUBMEDID:19043545	Serum metabolites
lincRNA	rs12491990	chr3	109447463	G	A	0.864865	ENSG00000242029	8.02e-05	PUBMEDID:20125193	Cognitive test performance
lincRNA	rs12518099	chr5	89546109	A	G	0.756237	ENSG00000248555	7e-07	PUBMEDID:19734900	Type 2 diabetes and other traits
lincRNA	rs12526133	chr6	14282023	C	T	0.450624	ENSG00000226673	5.87e-05	PUBMEDID:20038947	Major depressive disorder (broad)
lincRNA	rs12526186	chr6	30736151	C	T	0.81185	ENSG00000228022	3e-06	PUBMEDID:19721433	Response to antipsychotic treatment
lincRNA	rs12526481	chr6	30746633	C	A	0.685551	ENSG00000228022	6.63e-05	PUBMEDID:20125193	Cognitive test performance
lincRNA	rs12565755	chr1	61041875	T	C	0.849792	ENSG00000226476	5e-08	PUBMEDID:22491018	Response to tocilizumab in rheumatoid arthritis
lincRNA	rs12572750	chr10	109821919	T	C	0.753119	ENSG00000229981	4.99e-05	PUBMEDID:19043545	Serum metabolites
lincRNA	rs12604167	chr18	45059898	A	G	0.879938	ENSG00000261307	8.25e-05	PUBMEDID:19734545	Cognitive performance
lincRNA	rs12604483	chr18	53855525	A	T	0.509875	ENSG00000206129	7e-06	PUBMEDID:21160409	HIV-1 susceptibility
lincRNA	rs12607959	chr18	65226341	C	G	0.928794	ENSG00000265533	7.04e-06	PUBMEDID:20038947	Major depressive disorder (broad)
lincRNA	rs12608210	chr18	22493884	G	A	0.693347	ENSG00000266573	8.62e-05	PUBMEDID:19043545	Serum metabolites
lincRNA	rs12613830	chr2	229548445	A	G	0.922037	ENSG00000228226	4.54e-05	PUBMEDID:20010835	Pulmonary function
lincRNA	rs1261698	chr1	102794417	C	A	0.739085	ENSG00000233359	3.31e-05	PUBMEDID:19890347	Vitiligo
lincRNA	rs12653109	chr5	38089107	T	C	0.278067	ENSG00000250003	9.76e-05	PUBMEDID:20038947	Major depressive disorder (broad)
lincRNA	rs12654281	chr5	107040442	C	T	0.602911	ENSG00000249959	3.94e-07	PUBMEDID:19668339	Hippocampal atrophy
lincRNA	rs12655432	chr5	117402719	T	A	0.567048	ENSG00000249797	2.64e-05	PUBMEDID:20010835	Pulmonary function
lincRNA	rs12657273	chr5	107046698	T	C	0.598753	ENSG00000249959	9.25e-06	PUBMEDID:19668339	Hippocampal atrophy
lincRNA	rs12678139	chr8	71393750	G	A	0.522869	ENSG00000253967	8.17e-05	PUBMEDID:19043545	Serum metabolites
lincRNA	rs12679254	chr8	74274191	C	T	0.661123	ENSG00000253339	2e-06	PUBMEDID:18821565	Inattentive symptoms
lincRNA	rs12692450	chr2	12147176	G	C	0.504678	ENSG00000224184	8.49e-05	PUBMEDID:19043545	Serum metabolites
lincRNA	rs12704129	chr7	85079348	T	A	0.609667	ENSG00000225128	7.91e-07	PUBMEDID:19734903	Alzheimer`s disease
lincRNA	rs12707301	chr7	136078014	C	T	0.703222	ENSG00000232053	5.31e-05	PUBMEDID:20442857	Lipoprotein-associated phospholipase A2 activity and mass
lincRNA	rs12710701	chr2	19344757	T	C	0.231809	ENSG00000236204	1.76e-05	PUBMEDID:19043545	Serum metabolites
lincRNA	rs12742923	chr1	83489844	C	T	0.862786	ENSG00000230817	8e-07	PUBMEDID:22628157	HIV-associated dementia
lincRNA	rs12748299	chr1	198983324	C	G	0.673077	ENSG00000233410	1.66e-05	PUBMEDID:19609347	Hypertension
lincRNA	rs1275189	chr13	30946291	T	C	0.676715	ENSG00000238121	2.27e-05	PUBMEDID:19043545	Serum metabolites
lincRNA	rs12753569	chr1	76484014	G	T	0.50104	ENSG00000225605	8e-06	PUBMEDID:20691247	Personality dimensions
lincRNA	rs12757682	chr1	198981241	T	C	0.673597	ENSG00000233410	2.59e-05	PUBMEDID:19609347	Hypertension
lincRNA	rs12915016	chr15	98103736	A	G	0.267152	ENSG00000259582	1.44e-05	PUBMEDID:19043545	Serum metabolites
lincRNA	rs12933414	chr16	9493967	C	T	0.533264	ENSG00000261617	3.83e-05	PUBMEDID:18957941	Personality dimensions
lincRNA	rs12941150	chr17	70363395	G	A	0.849792	ENSG00000227036	7e-06	PUBMEDID:22424883	Pulmonary function decline
lincRNA	rs12949531	chr17	13733806	C	T	0.772869	ENSG00000236088	8e-06	PUBMEDID:19165918	Systemic lupus erythematosus
lincRNA	rs13000594	chr2	150667047	A	C	0.878898	ENSG00000162947	2.62e-05	PUBMEDID:19734545	Cognitive performance
lincRNA	rs13002429	chr2	11267366	T	C	0.484407	ENSG00000145063	5.53e-05	PUBMEDID:20010835	Pulmonary function
lincRNA	rs13006508	chr2	22741939	A	G	0.459979	ENSG00000231200	3.57e-05	PUBMEDID:19571809	Schizophrenia
lincRNA	rs13034680	chr2	19435346	C	A	0.635655	ENSG00000236204	4.36e-05	PUBMEDID:19890347	Vitiligo
lincRNA	rs13115673	chr4	132989468	G	T	0.623701	ENSG00000251598	1.57e-05	PUBMEDID:19571809	Schizophrenia
lincRNA	rs13160770	chr5	117401611	A	T	0.564969	ENSG00000249797	2.65e-05	PUBMEDID:20010835	Pulmonary function
lincRNA	rs13231722	chr7	85115886	T	C	0.970894	ENSG00000225128	2.4e-05	PUBMEDID:19734903	Alzheimer`s disease
lincRNA	rs13268776	chr8	135284669	G	A	0.714657	ENSG00000253627	6.12e-05	PUBMEDID:19043545	Serum metabolites
lincRNA	rs13273073	chr8	23584226	G	T	0.763514	ENSG00000254002	7e-06	PUBMEDID:22310353	Treatment response for severe sepsis
lincRNA	rs13330107	chr16	76878862	G	A	0.614345	ENSG00000259995	9e-06	PUBMEDID:18821565	Inattentive symptoms
lincRNA	rs13353224	chr18	65400425	A	G	0.935031	ENSG00000265533	9e-06	PUBMEDID:18821565	Hyperactive-impulsive symptoms
lincRNA	rs13398007	chr2	21469336	C	T	0.866944	ENSG00000233005	6.74e-10	PUBMEDID:19060911	Triglycerides
lincRNA	rs13398206	chr2	199169096	T	C	0.679834	ENSG00000236653	4e-06	PUBMEDID:22219177	Prostate cancer (gene x gene interaction)
lincRNA	rs13399680	chr2	12295638	C	T	0.52183	ENSG00000224184	4.66e-05	PUBMEDID:19043545	Serum metabolites
lincRNA	rs13413863	chr2	22615313	A	G	0.847713	ENSG00000231200	5.96e-05	PUBMEDID:19571809	Schizophrenia
lincRNA	rs13424767	chr2	22612275	T	C	0.852391	ENSG00000231200	1.02e-05	PUBMEDID:19571809	Schizophrenia
lincRNA	rs1353531	chr19	31846907	G	T	0.859148	ENSG00000267662	2.57e-05	PUBMEDID:20010835	Pulmonary function
lincRNA	rs1372067	chr8	137658719	A	G	0.97869	ENSG00000254101	5.93e-05	PUBMEDID:20125193	Cognitive test performance
lincRNA	rs1377169	chr18	59282156	A	G	0.797297	ENSG00000267175	8.38e-05	PUBMEDID:20038947	Major depressive disorder (broad)
lincRNA	rs1386330	chr11	87819427	T	C	0.852391	ENSG00000255102	2.19e-07	PUBMEDID:19010793	Multiple sclerosis (age of onset)
lincRNA	rs1396725	chr2	22612638	G	A	0.848233	ENSG00000231200	2.54e-05	PUBMEDID:19571809	Schizophrenia
lincRNA	rs1414125	chr10	2055591	C	A	0.534304	ENSG00000234962	9.4e-05	PUBMEDID:19448189	Response to lithium treatment in bipolar disorder
lincRNA	rs1423772	chr16	65308021	A	C	0.608108	ENSG00000260364	2.56e-05	PUBMEDID:19734545	Cognitive performance
lincRNA	rs1426790	chr14	87845954	C	T	0.632017	ENSG00000258859	8.9e-05	PUBMEDID:19043545	Serum metabolites
lincRNA	rs1427324	chr14	59364693	C	T	0.714657	ENSG00000258583	3.5e-05	PUBMEDID:18980221	Attention deficit hyperactivity disorder
lincRNA	rs1431686	chr4	132980813	C	T	0.548857	ENSG00000251598	5.34e-05	PUBMEDID:19571809	Schizophrenia
lincRNA	rs1437753	chr15	96928114	G	T	0.642412	ENSG00000259275	7.5e-05	PUBMEDID:18957941	Personality dimensions
lincRNA	rs1445787	chr5	172852878	T	C	0.340956	ENSG00000253968	7.9e-05	PUBMEDID:19772629	Parkinson`s disease (age of onset)
lincRNA	rs1449249	chr8	93597541	C	T	0.402287	ENSG00000253634	8.91e-05	PUBMEDID:20038947	Major depressive disorder (broad)
lincRNA	rs1451296	chr18	22362861	T	C	0.782225	ENSG00000266573	7.57e-06	PUBMEDID:19846067	Response to citalopram treatment
lincRNA	rs1452093	chr21	28744356	A	G	0.393451	ENSG00000236332	2e-06	PUBMEDID:21546767	Dialysis-related mortality
lincRNA	rs1457451	chr2	65862378	G	A	0.900208	ENSG00000235725	2.74e-06	PUBMEDID:19084217	Serum markers of iron status
lincRNA	rs1463186	chr8	93600470	T	C	0.410083	ENSG00000253634	8.23e-05	PUBMEDID:20038947	Major depressive disorder (broad)
lincRNA	rs1464500	chr12	24389660	G	T	0.300416	ENSG00000255864	1e-07	PUBMEDID:20195266	Response to antipsychotic treatment
lincRNA	rs1464791	chr3	81893929	G	T	0.653846	ENSG00000242009	8.48e-05	PUBMEDID:19043545	Serum metabolites
lincRNA	rs1473441	chr8	49588463	A	G	0.295738	ENSG00000233858	7.4e-05	PUBMEDID:18957941	Personality dimensions
lincRNA	rs1473581	chr8	128204216	C	T	0.692827	ENSG00000254166	4.5e-05	PUBMEDID:19465909	Malaria
lincRNA	rs1476443	chr7	91272544	C	T	0.851871	ENSG00000223665	7.7e-05	PUBMEDID:18957941	Personality dimensions
lincRNA	rs1478052	chr4	19174460	T	C	0.448545	ENSG00000248238	5.43e-05	PUBMEDID:19043545	Serum metabolites
lincRNA	rs1488004	chr7	135800955	A	G	0.509356	ENSG00000232053	7.65e-05	PUBMEDID:19043545	Serum metabolites
lincRNA	rs1499451	chr8	137977335	T	G	0.404886	ENSG00000254101	3.8e-05	PUBMEDID:19043545	Serum metabolites
lincRNA	rs1502618	chr3	59474415	C	G	0.410603	ENSG00000242545	2.2e-05	PUBMEDID:19043545	Serum metabolites
lincRNA	rs1509355	chr2	22613819	C	T	0.847713	ENSG00000231200	2.72e-05	PUBMEDID:19571809	Schizophrenia
lincRNA	rs1509360	chr2	22616777	G	A	0.847713	ENSG00000231200	1.8e-05	PUBMEDID:19571809	Schizophrenia
lincRNA	rs1509379	chr2	22576085	A	C	0.919439	ENSG00000231200	6.75e-05	PUBMEDID:19571809	Schizophrenia
lincRNA	rs1514178	chr1	61205469	T	C	0.984927	ENSG00000231252	2e-07	PUBMEDID:21829377	Phospholipid levels (plasma)
lincRNA	rs1514773	chr9	120650670	A	G	0.330561	ENSG00000231901	1.63e-05	PUBMEDID:19043545	Serum metabolites
lincRNA	rs151879	chr5	127200523	T	C	0.286383	ENSG00000230561	7.86e-05	PUBMEDID:19023125	Brain imaging in schizophrenia (interaction)
lincRNA	rs1523288	chr3	165280209	C	T	0.357588	ENSG00000244128	6e-06	PUBMEDID:20445134	Heart failure
lincRNA	rs1529093	chr2	177909595	T	C	0.432432	ENSG00000236501	2e-06	PUBMEDID:20708005	Non-alcoholic fatty liver disease histology (other)
lincRNA	rs1534422	chr2	12640741	G	A	0.456861	ENSG00000224184	2e-06	PUBMEDID:19430480	Type 1 diabetes
lincRNA	rs1537426	chr14	36587167	A	G	0.409044	ENSG00000257585	1.53e-05	PUBMEDID:19043545	Serum metabolites
lincRNA	rs1537427	chr14	36586846	T	C	0.430353	ENSG00000257585	6.9e-06	PUBMEDID:19043545	Serum metabolites
lincRNA	rs1545884	chr14	97976854	G	A	0.304574	ENSG00000246084	3.51e-05	PUBMEDID:18957941	Personality dimensions
lincRNA	rs1561499	chr1	213709450	C	A	0.2921	ENSG00000225233	6.69e-05	PUBMEDID:19043545	Serum metabolites
lincRNA	rs1562430	chr8	128387852	T	C	0.595114	ENSG00000253929	6e-07	PUBMEDID:20453838	Breast cancer
lincRNA	rs1562430	chr8	128387852	T	C	0.595114	ENSG00000253929	3e-11	PUBMEDID:21263130	Breast cancer
lincRNA	rs1566039	chr5	6821914	G	A	0.64605	ENSG00000249734	1e-08	PUBMEDID:22359512	Sphingolipid levels
lincRNA	rs1583931	chr11	13826331	A	G	0.558212	ENSG00000255411	4.82e-05	PUBMEDID:19043545	Serum metabolites
lincRNA	rs1584254	chr8	135324352	A	C	0.330561	ENSG00000253627	3.02e-05	PUBMEDID:19734545	Cognitive performance
lincRNA	rs1584573	chr3	3617016	A	G	0.778586	ENSG00000223727	1.4e-05	PUBMEDID:18957941	Personality dimensions
lincRNA	rs1597268	chr4	59663396	T	C	0.209459	ENSG00000251339	9.18e-05	PUBMEDID:18957941	Personality dimensions
lincRNA	rs1604006	chr3	25064354	C	T	0.477131	ENSG00000237838	6.64e-05	PUBMEDID:19043545	Serum metabolites
lincRNA	rs1605834	chr2	22576100	A	G	0.850312	ENSG00000231200	1.61e-05	PUBMEDID:19571809	Schizophrenia
lincRNA	rs1629912	chr14	83121689	C	G	0.446985	ENSG00000258743	1.21e-05	PUBMEDID:19043545	Serum metabolites
lincRNA	rs16861531	chr2	14398052	G	C	0.99896	ENSG00000230448	7e-07	PUBMEDID:22041458	Response to antidepressant treatment
lincRNA	rs16889086	chr4	13728777	T	C	0.975052	ENSG00000250634	4.31e-05	PUBMEDID:19734545	Cognitive performance
lincRNA	rs16903843	chr5	38051241	T	C	0.809771	ENSG00000250003	7.05e-05	PUBMEDID:20038947	Major depressive disorder (broad)
lincRNA	rs16906098	chr8	137570047	C	T	0.97869	ENSG00000254101	5.93e-05	PUBMEDID:20125193	Cognitive test performance
lincRNA	rs169187	chr5	38056271	A	G	0.70894	ENSG00000250003	4.97e-06	PUBMEDID:20038947	Major depressive disorder (broad)
lincRNA	rs16922670	chr9	106024220	T	C	0.85447	ENSG00000225564	7e-06	PUBMEDID:22005930	Alzheimer`s disease
lincRNA	rs16970717	chr15	79508010	A	G	0.879938	ENSG00000259234	8.33e-05	PUBMEDID:19571809	Schizophrenia
lincRNA	rs16973566	chr19	40176917	T	C	0.655405	ENSG00000226025	8.3e-06	PUBMEDID:19846067	Response to citalopram treatment
lincRNA	rs1703301	chr5	38058559	C	T	0.70894	ENSG00000250003	5.4e-06	PUBMEDID:20038947	Major depressive disorder (broad)
lincRNA	rs17043947	chr2	22736987	C	T	0.948545	ENSG00000231200	2e-07	PUBMEDID:20707712	Self-rated health
lincRNA	rs17054266	chr9	91260661	G	A	0.745322	ENSG00000228189	8.3e-05	PUBMEDID:19389651	Electrocardiographic conduction measures
lincRNA	rs17060351	chr8	29413436	G	A	0.739605	ENSG00000253182	8.39e-05	PUBMEDID:19043545	Serum metabolites
lincRNA	rs17077540	chr18	65285279	A	G	0.869543	ENSG00000265533	6.04e-07	PUBMEDID:20038947	Major depressive disorder (broad)
lincRNA	rs17077540	chr18	65285279	A	G	0.869543	ENSG00000265533	2e-07	PUBMEDID:20125088	Major depressive disorder
lincRNA	rs17085106	chr18	69439073	G	T	0.981289	ENSG00000265352	4e-08	PUBMEDID:19656524	Nonsyndromic cleft lip with or without cleft palate
lincRNA	rs17103175	chr5	144818318	C	A	0.734927	ENSG00000248125	7.46e-06	PUBMEDID:19043545	Serum metabolites
lincRNA	rs17111920	chr14	27406892	G	T	0.990125	ENSG00000258081	3e-06	PUBMEDID:20889312	Biplolar disorder and schizophrenia
lincRNA	rs171891	chr6	142850612	G	A	0.811331	ENSG00000236366	2.09e-08	PUBMEDID:20010835	Pulmonary function
lincRNA	rs171915	chr6	142866845	G	A	0.787942	ENSG00000236366	7.94e-07	PUBMEDID:20010835	Pulmonary function
lincRNA	rs17203928	chr18	22372891	G	C	0.767152	ENSG00000266573	9.15e-05	PUBMEDID:19846067	Response to citalopram treatment
lincRNA	rs17203977	chr18	22399548	C	G	0.781705	ENSG00000266573	9.88e-05	PUBMEDID:19846067	Response to citalopram treatment
lincRNA	rs17280766	chr7	13637369	A	G	0.948025	ENSG00000229618	1.63e-05	PUBMEDID:19525953	Multiple sclerosis
lincRNA	rs1729011	chr5	38058518	G	A	0.709459	ENSG00000250003	5.28e-06	PUBMEDID:20038947	Major depressive disorder (broad)
lincRNA	rs17321515	chr8	126486409	A	G	0.525468	ENSG00000253111	7e-13	PUBMEDID:18193043	Triglycerides
lincRNA	rs17321515	chr8	126486409	A	G	0.525468	ENSG00000253111	4e-17	PUBMEDID:18193044	Triglycerides
lincRNA	rs17361720	chr12	23261612	T	C	0.68659	ENSG00000256321	3.13e-05	PUBMEDID:19043545	Serum metabolites
lincRNA	rs17361776	chr12	23261653	T	G	0.742723	ENSG00000256321	1.04e-05	PUBMEDID:19043545	Serum metabolites
lincRNA	rs17366322	chr2	11272784	G	T	0.497921	ENSG00000145063	7.26e-05	PUBMEDID:20010835	Pulmonary function
lincRNA	rs17419851	chr6	24749413	C	T	0.856029	ENSG00000224164	9e-06	PUBMEDID:21507922	Neutrophil count
lincRNA	rs17426695	chr1	5696425	G	A	0.964137	ENSG00000236948	3.87e-05	PUBMEDID:20125193	Cognitive test performance
lincRNA	rs17459026	chr12	23259999	T	C	0.757277	ENSG00000256321	6.26e-05	PUBMEDID:19043545	Serum metabolites
lincRNA	rs17487246	chr4	149970086	G	A	0.892931	ENSG00000249752	6.18e-05	PUBMEDID:20010835	Pulmonary function
lincRNA	rs17497475	chr4	19242239	C	A	0.466736	ENSG00000248238	4.75e-05	PUBMEDID:19043545	Serum metabolites
lincRNA	rs17557796	chr9	23830403	A	G	0.629418	ENSG00000231460	4.56e-05	PUBMEDID:19043545	Serum metabolites
lincRNA	rs1757171	chr6	37487044	T	C	0.35447	ENSG00000204110	7.1e-06	PUBMEDID:19734545	Cognitive performance
lincRNA	rs17589290	chr4	112923237	C	G	0.997401	ENSG00000249815	6e-06	PUBMEDID:21347282	Coronary heart disease
lincRNA	rs17605562	chr2	12037179	C	T	0.949584	ENSG00000224184	9e-06	PUBMEDID:19896111	Hair morphology
lincRNA	rs176137	chr18	62783053	T	G	0.47817	ENSG00000263863	9.93e-05	PUBMEDID:19043545	Serum metabolites
lincRNA	rs176148	chr18	62773435	C	T	0.455821	ENSG00000263863	3.51e-06	PUBMEDID:19043545	Serum metabolites
lincRNA	rs17668154	chr8	1014566	C	A	0.661123	ENSG00000237647	4.19e-05	PUBMEDID:19043545	Serum metabolites
lincRNA	rs17679567	chr16	76890126	T	C	0.765593	ENSG00000259995	9e-06	PUBMEDID:22569225	Response to TNF-alpha inhibitors in rheumatoid arthritis
lincRNA	rs17695537	chr8	138914072	C	T	0.785863	ENSG00000253288	8.4e-05	PUBMEDID:19043545	Serum metabolites
lincRNA	rs17718828	chr13	75128114	C	T	0.897609	ENSG00000236678	1e-08	PUBMEDID:22359512	Phospholipid levels (plasma)
lincRNA	rs17722514	chr13	90713945	C	T	0.926715	ENSG00000261446	3.14e-05	PUBMEDID:18980221	Attention deficit hyperactivity disorder
lincRNA	rs17728971	chr14	46467831	A	G	0.496881	ENSG00000258700	6.5e-07	PUBMEDID:19465909	Malaria
lincRNA	rs17767419	chr16	79744548	C	T	0.670998	ENSG00000260876	9e-15	PUBMEDID:21565293	Thyroid volume
lincRNA	rs17770708	chr21	26284664	G	A	0.906445	ENSG00000226983	4.5e-06	PUBMEDID:19772629	Parkinson`s disease (age of onset)
lincRNA	rs1791124	chr18	3316176	T	G	0.882017	ENSG00000266578	1.85e-05	PUBMEDID:19581569	Alcohol dependence
lincRNA	rs1817900	chr5	38087767	A	G	0.277027	ENSG00000250003	9.36e-05	PUBMEDID:20038947	Major depressive disorder (broad)
lincRNA	rs1817901	chr5	38087810	A	G	0.277547	ENSG00000250003	9.43e-05	PUBMEDID:20038947	Major depressive disorder (broad)
lincRNA	rs1828887	chr9	120623523	C	T	0.980769	ENSG00000228512	9.03e-05	PUBMEDID:20038947	Major depressive disorder (broad)
lincRNA	rs1841513	chr8	137811069	A	G	0.391372	ENSG00000254101	1.72e-05	PUBMEDID:20125193	Cognitive test performance
lincRNA	rs1859962	chr17	69108753	G	T	0.462058	ENSG00000260785	3e-10	PUBMEDID:17603485	Prostate cancer
lincRNA	rs1859962	chr17	69108753	G	T	0.462058	ENSG00000260785	1e-06	PUBMEDID:18264097	Prostate cancer
lincRNA	rs1859962	chr17	69108753	G	T	0.462058	ENSG00000260785	2e-16	PUBMEDID:19767753	Prostate cancer
lincRNA	rs1859962	chr17	69108753	G	T	0.462058	ENSG00000260785	3e-11	PUBMEDID:21743057	Prostate cancer
lincRNA	rs1867413	chr18	65242889	T	C	0.931393	ENSG00000265533	5.54e-06	PUBMEDID:20038947	Major depressive disorder (broad)
lincRNA	rs1873613	chr12	40552417	T	C	0.343555	ENSG00000223914	5.1e-05	PUBMEDID:20018961	Leprosy
lincRNA	rs1874170	chr5	38085159	T	G	0.722973	ENSG00000250003	8.89e-05	PUBMEDID:20038947	Major depressive disorder (broad)
lincRNA	rs1879370	chr3	173002125	A	T	0.781185	ENSG00000237473	7.83e-05	PUBMEDID:18957941	Personality dimensions
lincRNA	rs1884537	chr14	101251989	C	T	0.568607	ENSG00000214548	2e-06	PUBMEDID:20395239	Optic disc size (disc)
lincRNA	rs1892543	chr1	187434767	C	T	0.339917	ENSG00000231599	5.23e-05	PUBMEDID:19043545	Serum metabolites
lincRNA	rs1900004	chr10	70000881	C	T	0.761954	ENSG00000233590	3e-35	PUBMEDID:20548946	Optic disc parameters
lincRNA	rs1912879	chr12	17683517	C	T	0.467256	ENSG00000256994	1.47e-06	PUBMEDID:19043545	Serum metabolites
lincRNA	rs1917445	chr11	103589094	C	T	0.460499	ENSG00000254987	6e-07	PUBMEDID:21507922	Neutrophil count
lincRNA	rs1938522	chr1	187435580	G	T	0.339917	ENSG00000231599	5.27e-05	PUBMEDID:19043545	Serum metabolites
lincRNA	rs1949038	chr2	22616534	T	C	0.847713	ENSG00000231200	2.58e-05	PUBMEDID:19571809	Schizophrenia
lincRNA	rs1958624	chr14	36597898	C	T	0.431913	ENSG00000257585	7.29e-06	PUBMEDID:19043545	Serum metabolites
lincRNA	rs1977620	chr9	98475674	C	T	0.706341	ENSG00000228142	9.38e-06	PUBMEDID:19043545	Serum metabolites
lincRNA	rs1979813	chr8	137829950	G	T	0.149688	ENSG00000254101	1.72e-05	PUBMEDID:20125193	Cognitive test performance
lincRNA	rs1986364	chr9	105309407	T	C	0.774428	ENSG00000204250	5.11e-05	PUBMEDID:19754311	AIDS
lincRNA	rs1991700	chr4	132972290	T	C	0.553015	ENSG00000251598	9.51e-05	PUBMEDID:19571809	Schizophrenia
lincRNA	rs2014791	chr21	23145950	T	C	0.377859	ENSG00000233997	8.46e-05	PUBMEDID:20038947	Major depressive disorder (broad)
lincRNA	rs2036590	chr4	188455415	C	T	0.136175	ENSG00000250590	1.38e-05	PUBMEDID:19043545	Serum metabolites
lincRNA	rs2048672	chr7	130653851	C	A	0.7079	ENSG00000231721	6e-06	PUBMEDID:21908515	Breast cancer
lincRNA	rs2056168	chr4	153977593	A	G	0.120062	ENSG00000249022	7.07e-05	PUBMEDID:20125193	Cognitive test performance
lincRNA	rs2058742	chr17	70040547	G	T	0.655925	ENSG00000254148	2.81e-05	PUBMEDID:19684573	Response to hepatitis C treatment
lincRNA	rs2072590	chr2	177042633	A	C	0.31237	ENSG00000226363	5e-14	PUBMEDID:20852632	Ovarian cancer
lincRNA	rs2073233	chr20	12874585	T	C	0.590437	ENSG00000233048	1e-06	PUBMEDID:20171287	Brain structure
lincRNA	rs2118381	chr2	19368078	G	A	0.25	ENSG00000236204	7.55e-05	PUBMEDID:19043545	Serum metabolites
lincRNA	rs2119704	chr14	88487689	C	A	0.924636	ENSG00000258826	2e-10	PUBMEDID:21833088	Multiple sclerosis
lincRNA	rs2126259	chr8	9185146	T	C	0.0961538	ENSG00000254235	7e-12	PUBMEDID:20864672	LDL cholesterol
lincRNA	rs2138852	chr17	27703349	C	T	0.490125	ENSG00000266111	7e-28	PUBMEDID:19110211	Mean platelet volume
lincRNA	rs2138852	chr17	27703349	C	T	0.490125	ENSG00000266111	1e-22	PUBMEDID:19820697	Mean platelet volume
lincRNA	rs2169288	chr12	74782677	A	C	0.0784823	ENSG00000251138	7.53e-05	PUBMEDID:20010835	Pulmonary function
lincRNA	rs2170819	chr14	97976764	C	A	0.304574	ENSG00000246084	2.67e-05	PUBMEDID:18957941	Personality dimensions
lincRNA	rs2188743	chr16	13549769	G	A	0.429834	ENSG00000262801	5.27e-05	PUBMEDID:19107115	Major depressive disorder
lincRNA	rs2192204	chr4	137312423	T	G	0.00259875	ENSG00000251567	1.29e-05	PUBMEDID:19846067	Response to citalopram treatment
lincRNA	rs219553	chr2	21577743	G	A	0.794699	ENSG00000231204	7e-06	PUBMEDID:20932654	Erectile dysfunction and prostate cancer treatment
lincRNA	rs2205156	chr8	91440226	T	C	0.632536	ENSG00000253394	5.7e-06	PUBMEDID:19465909	Malaria
lincRNA	rs2216746	chr16	65339864	C	T	0.587318	ENSG00000260364	8.85e-05	PUBMEDID:19734545	Cognitive performance
lincRNA	rs2219576	chr4	52912589	A	T	0.462578	ENSG00000251040	5.07e-05	PUBMEDID:19043545	Serum metabolites
lincRNA	rs2221844	chr8	138927680	C	T	0.128898	ENSG00000253288	1.47e-05	PUBMEDID:20125193	Cognitive test performance
lincRNA	rs2222787	chr3	109381428	G	A	0.861227	ENSG00000242029	8.74e-05	PUBMEDID:20125193	Cognitive test performance
lincRNA	rs2251301	chr8	11119037	C	T	0.83264	ENSG00000236827	1e-06	PUBMEDID:19875103	Response to antipsychotic therapy (extrapyramidal side effects)
lincRNA	rs227897	chr4	112842885	T	A	0.673077	ENSG00000249815	3.58e-05	PUBMEDID:19043545	Serum metabolites
lincRNA	rs2285253	chr11	115616372	T	C	0.919439	ENSG00000256717	9.42e-05	PUBMEDID:20010835	Pulmonary function
lincRNA	rs2295426	chr14	59376455	T	C	0.716216	ENSG00000258583	1e-05	PUBMEDID:18980221	Attention deficit hyperactivity disorder
lincRNA	rs2300701	chr2	31787008	A	G	0.41632	ENSG00000228563	1.35e-05	PUBMEDID:19043545	Serum metabolites
lincRNA	rs234182	chr14	98133191	G	A	0.555613	ENSG00000197176	5.49e-05	PUBMEDID:19043545	Serum metabolites
lincRNA	rs2368697	chr17	32498200	G	A	0.758316	ENSG00000261156	9.86e-05	PUBMEDID:19043545	Serum metabolites
lincRNA	rs2392780	chr8	128388025	A	G	0.593555	ENSG00000253929	1.18e-05	PUBMEDID:19043545	Serum metabolites
lincRNA	rs2400997	chr14	101727107	C	T	0.517672	ENSG00000258497	3e-06	PUBMEDID:22219177	Prostate cancer (gene x gene interaction)
lincRNA	rs2415317	chr14	36609678	G	A	0.425156	ENSG00000257585	5.81e-06	PUBMEDID:19043545	Serum metabolites
lincRNA	rs2416504	chr5	117409092	T	C	0.559252	ENSG00000249797	1.59e-05	PUBMEDID:20010835	Pulmonary function
lincRNA	rs2424167	chr20	18325355	A	G	0.233888	ENSG00000230010	1.15e-05	PUBMEDID:19010793	Multiple sclerosis (age of onset)
lincRNA	rs245178	chr5	127203192	C	T	0.293659	ENSG00000230561	1.22e-06	PUBMEDID:19023125	Brain imaging in schizophrenia (interaction)
lincRNA	rs2453332	chr5	38087361	A	G	0.277027	ENSG00000250003	9.2e-05	PUBMEDID:20038947	Major depressive disorder (broad)
lincRNA	rs2453333	chr5	38088411	T	C	0.277027	ENSG00000250003	9.59e-05	PUBMEDID:20038947	Major depressive disorder (broad)
lincRNA	rs2453335	chr5	38089427	A	T	0.277027	ENSG00000250003	9.53e-05	PUBMEDID:20038947	Major depressive disorder (broad)
lincRNA	rs2453338	chr5	38094871	A	T	0.335239	ENSG00000250003	1.69e-05	PUBMEDID:20038947	Major depressive disorder (broad)
lincRNA	rs2462049	chr7	85099898	G	T	0.512474	ENSG00000225128	1.1e-05	PUBMEDID:19734903	Alzheimer`s disease
lincRNA	rs2462051	chr7	85099770	G	T	0.497921	ENSG00000225128	1.2e-05	PUBMEDID:19734903	Alzheimer`s disease
lincRNA	rs2463670	chr7	85104293	C	A	0.483888	ENSG00000225128	1.8e-07	PUBMEDID:19734903	Alzheimer`s disease
lincRNA	rs2463765	chr5	38094717	A	G	0.329522	ENSG00000250003	3.99e-05	PUBMEDID:20038947	Major depressive disorder (broad)
lincRNA	rs2463769	chr5	38089284	A	G	0.277027	ENSG00000250003	9.55e-05	PUBMEDID:20038947	Major depressive disorder (broad)
lincRNA	rs2471046	chr5	38087078	C	A	0.277027	ENSG00000250003	9.1e-05	PUBMEDID:20038947	Major depressive disorder (broad)
lincRNA	rs2471047	chr5	38087397	T	C	0.277027	ENSG00000250003	9.33e-05	PUBMEDID:20038947	Major depressive disorder (broad)
lincRNA	rs2471049	chr5	38088444	A	G	0.277027	ENSG00000250003	9.72e-05	PUBMEDID:20038947	Major depressive disorder (broad)
lincRNA	rs2471050	chr5	38088520	T	C	0.277027	ENSG00000250003	7.74e-05	PUBMEDID:20038947	Major depressive disorder (broad)
lincRNA	rs2471052	chr5	38090175	T	C	0.277027	ENSG00000250003	9.54e-05	PUBMEDID:20038947	Major depressive disorder (broad)
lincRNA	rs2471065	chr5	38095315	G	T	0.335239	ENSG00000250003	1.93e-05	PUBMEDID:20038947	Major depressive disorder (broad)
lincRNA	rs2471070	chr5	38091354	T	C	0.277027	ENSG00000250003	9.72e-05	PUBMEDID:20038947	Major depressive disorder (broad)
lincRNA	rs2471074	chr5	38091684	C	T	0.277027	ENSG00000250003	9.68e-05	PUBMEDID:20038947	Major depressive disorder (broad)
lincRNA	rs2511317	chr11	90556357	C	T	0.928274	ENSG00000261645	3.8e-05	PUBMEDID:19010793	Brain lesion load
lincRNA	rs2524123	chr6	31265314	T	C	0.661642	ENSG00000256166	2.04e-09	PUBMEDID:20526339	Vitiligo
lincRNA	rs2524132	chr6	31264912	G	A	0.877859	ENSG00000256166	1.95e-07	PUBMEDID:20018961	Leprosy
lincRNA	rs2540917	chr2	60608759	T	C	0.601351	ENSG00000223929	1e-14	PUBMEDID:19862010	Mean corpuscular volume
lincRNA	rs2582431	chr8	137836277	C	T	0.148129	ENSG00000254101	1.72e-05	PUBMEDID:20125193	Cognitive test performance
lincRNA	rs2582435	chr8	137833740	A	G	0.148649	ENSG00000254101	1.46e-05	PUBMEDID:20125193	Cognitive test performance
lincRNA	rs2582444	chr8	137830784	C	T	0.149688	ENSG00000254101	1.72e-05	PUBMEDID:20125193	Cognitive test performance
lincRNA	rs2582447	chr8	137828862	A	G	0.149688	ENSG00000254101	1.72e-05	PUBMEDID:20125193	Cognitive test performance
lincRNA	rs2582454	chr8	137817574	C	T	0.149688	ENSG00000254101	1.72e-05	PUBMEDID:20125193	Cognitive test performance
lincRNA	rs2582478	chr8	137776731	A	G	0.149168	ENSG00000254101	1.72e-05	PUBMEDID:20125193	Cognitive test performance
lincRNA	rs2610067	chr8	137835656	T	C	0.148649	ENSG00000254101	1.72e-05	PUBMEDID:20125193	Cognitive test performance
lincRNA	rs2610080	chr8	137771190	C	A	0.14657	ENSG00000254101	4.43e-05	PUBMEDID:20125193	Cognitive test performance
lincRNA	rs2610084	chr8	137772759	T	C	0.149168	ENSG00000254101	1.72e-05	PUBMEDID:20125193	Cognitive test performance
lincRNA	rs2610088	chr8	137779259	T	C	0.149168	ENSG00000254101	1.72e-05	PUBMEDID:20125193	Cognitive test performance
lincRNA	rs2610093	chr8	137787569	A	G	0.149168	ENSG00000254101	1.72e-05	PUBMEDID:20125193	Cognitive test performance
lincRNA	rs2610114	chr8	137812540	T	C	0.149688	ENSG00000254101	1.72e-05	PUBMEDID:20125193	Cognitive test performance
lincRNA	rs2610127	chr8	137826173	C	T	0.149688	ENSG00000254101	1.72e-05	PUBMEDID:20125193	Cognitive test performance
lincRNA	rs2610128	chr8	137827853	C	T	0.149688	ENSG00000254101	1.72e-05	PUBMEDID:20125193	Cognitive test performance
lincRNA	rs2613815	chr8	137825180	G	A	0.149168	ENSG00000254101	1.72e-05	PUBMEDID:20125193	Cognitive test performance
lincRNA	rs2613817	chr8	137826900	G	T	0.149688	ENSG00000254101	1.72e-05	PUBMEDID:20125193	Cognitive test performance
lincRNA	rs262130	chr6	142853486	C	T	0.796258	ENSG00000236366	2.68e-07	PUBMEDID:20010835	Pulmonary function
lincRNA	rs263178	chr6	142865106	C	T	0.690748	ENSG00000236366	2.91e-08	PUBMEDID:20010835	Pulmonary function
lincRNA	rs263179	chr6	142863888	T	C	0.688669	ENSG00000236366	2.3e-08	PUBMEDID:20010835	Pulmonary function
lincRNA	rs2649123	chr8	137818388	T	G	0.149688	ENSG00000254101	1.72e-05	PUBMEDID:20125193	Cognitive test performance
lincRNA	rs2649126	chr8	137815729	G	A	0.149688	ENSG00000254101	1.23e-05	PUBMEDID:20125193	Cognitive test performance
lincRNA	rs2649127	chr8	137815685	T	C	0.149688	ENSG00000254101	1.88e-05	PUBMEDID:20125193	Cognitive test performance
lincRNA	rs2649129	chr8	137814742	G	A	0.149688	ENSG00000254101	1.72e-05	PUBMEDID:20125193	Cognitive test performance
lincRNA	rs2649130	chr8	137814585	G	A	0.149688	ENSG00000254101	1.99e-05	PUBMEDID:20125193	Cognitive test performance
lincRNA	rs2652836	chr15	63396301	C	T	0.242723	ENSG00000259672	3.97e-05	PUBMEDID:19043545	Serum metabolites
lincRNA	rs2666275	chr10	33367804	C	G	0.544179	ENSG00000229656	9.08e-05	PUBMEDID:19043545	Serum metabolites
lincRNA	rs2666279	chr10	33364859	G	T	0.533264	ENSG00000229656	5.89e-05	PUBMEDID:19043545	Serum metabolites
lincRNA	rs2668096	chr8	138912997	G	A	0.935551	ENSG00000253288	1.48e-05	PUBMEDID:20125193	Cognitive test performance
lincRNA	rs2668104	chr8	138919052	C	T	0.936071	ENSG00000253288	3.24e-05	PUBMEDID:20125193	Cognitive test performance
lincRNA	rs2701016	chr7	135971714	A	C	0.283784	ENSG00000232053	9.41e-05	PUBMEDID:19043545	Serum metabolites
lincRNA	rs2705293	chr8	138918945	C	T	0.0654886	ENSG00000253288	6e-06	PUBMEDID:18762592	Neuroticism
lincRNA	rs270537	chr5	38053488	A	G	0.70842	ENSG00000250003	3.64e-06	PUBMEDID:20038947	Major depressive disorder (broad)
lincRNA	rs270538	chr5	38053333	A	G	0.70842	ENSG00000250003	3.77e-06	PUBMEDID:20038947	Major depressive disorder (broad)
lincRNA	rs270543	chr5	38052046	G	A	0.7079	ENSG00000250003	3.41e-06	PUBMEDID:20038947	Major depressive disorder (broad)
lincRNA	rs270545	chr5	38051593	G	A	0.70842	ENSG00000250003	3.39e-06	PUBMEDID:20038947	Major depressive disorder (broad)
lincRNA	rs270545	chr5	38051593	G	A	0.70842	ENSG00000250003	1e-06	PUBMEDID:20125088	Major depressive disorder
lincRNA	rs270578	chr5	38078180	A	G	0.676715	ENSG00000250003	1.51e-05	PUBMEDID:20038947	Major depressive disorder (broad)
lincRNA	rs270584	chr5	38074854	C	A	0.599792	ENSG00000250003	2.06e-06	PUBMEDID:20038947	Major depressive disorder (broad)
lincRNA	rs270592	chr5	38066586	G	A	0.598753	ENSG00000250003	1.88e-06	PUBMEDID:20038947	Major depressive disorder (broad)
lincRNA	rs270594	chr5	38060688	T	C	0.709459	ENSG00000250003	5.94e-06	PUBMEDID:20038947	Major depressive disorder (broad)
lincRNA	rs270596	chr5	38057728	C	T	0.709459	ENSG00000250003	5.32e-06	PUBMEDID:20038947	Major depressive disorder (broad)
lincRNA	rs270599	chr5	38055273	C	A	0.709459	ENSG00000250003	4.5e-06	PUBMEDID:20038947	Major depressive disorder (broad)
lincRNA	rs2788110	chr9	84962689	A	G	0.659044	ENSG00000228430	4.24e-05	PUBMEDID:19571809	Schizophrenia
lincRNA	rs2827039	chr21	23164745	T	C	0.412682	ENSG00000233997	4.01e-05	PUBMEDID:19043545	Serum metabolites
lincRNA	rs2831649	chr21	29582347	G	A	0.776507	ENSG00000236532	5.01e-05	PUBMEDID:20038947	Major depressive disorder (broad)
lincRNA	rs2838303	chr21	44871189	C	T	0.788981	ENSG00000188660	9.03e-05	PUBMEDID:19734545	Cognitive performance
lincRNA	rs2848800	chr18	37321974	T	C	0.663721	ENSG00000267374	9.82e-05	PUBMEDID:19043545	Serum metabolites
lincRNA	rs2877832	chr14	27800177	C	T	0.887734	ENSG00000258081	2e-06	PUBMEDID:17903298	Diabetes related insulin traits
lincRNA	rs2894207	chr6	31263751	T	C	0.806133	ENSG00000256166	5.23e-07	PUBMEDID:19115949	AIDS progression
lincRNA	rs2894207	chr6	31263751	T	C	0.806133	ENSG00000256166	3e-33	PUBMEDID:20512145	Nasopharyngeal carcinoma
lincRNA	rs2899469	chr15	51481922	A	G	0.572245	ENSG00000259240	9.35e-05	PUBMEDID:20125193	Cognitive test performance
lincRNA	rs2900115	chr5	117414350	G	A	0.907484	ENSG00000249797	3.14e-05	PUBMEDID:20010835	Pulmonary function
lincRNA	rs2903698	chr4	76332975	A	G	0.743763	ENSG00000248646	6e-06	PUBMEDID:22210626	Prion diseases
lincRNA	rs2935776	chr8	109629903	A	G	0.777547	ENSG00000253949	6e-07	PUBMEDID:20932310	T-tau
lincRNA	rs2954020	chr8	126481952	A	G	0.318607	ENSG00000253111	5.12e-05	PUBMEDID:19107115	Major depressive disorder
lincRNA	rs2954020	chr8	126481952	A	G	0.318607	ENSG00000253111	1.85e-05	PUBMEDID:20125193	Cognitive test performance
lincRNA	rs2954021	chr8	126482077	A	G	0.490125	ENSG00000253111	1e-07	PUBMEDID:20864672	LDL cholesterol
lincRNA	rs2954021	chr8	126482077	A	G	0.490125	ENSG00000253111	2e-13	PUBMEDID:22001757	Liver enzyme levels (alkaline phosphatase)
lincRNA	rs2954026	chr8	126484526	T	G	0.31289	ENSG00000253111	8e-09	PUBMEDID:21386085	HDL Cholesterol - Triglycerides (HDLC-TG)
lincRNA	rs2954029	chr8	126490972	A	T	0.536383	ENSG00000253111	3e-19	PUBMEDID:19060906	Triglycerides
lincRNA	rs2954029	chr8	126490972	A	T	0.536383	ENSG00000253111	2e-11	PUBMEDID:20864672	Triglycerides
lincRNA	rs2954033	chr8	126493746	A	G	0.314969	ENSG00000253111	9e-09	PUBMEDID:21386085	Triglycerides-Blood Pressure (TG-BP)
lincRNA	rs2954038	chr8	126507389	C	A	0.31341	ENSG00000253111	7e-06	PUBMEDID:20339536	Response to statin therapy
lincRNA	rs2962209	chr5	18738896	T	C	0.347713	ENSG00000248693	6.4e-05	PUBMEDID:19772629	Parkinson`s disease (age of onset)
lincRNA	rs2977451	chr8	141534198	A	G	0.153846	ENSG00000259758	2.4e-06	PUBMEDID:19060907	Fasting plasma glucose
lincRNA	rs2980876	chr8	126481694	C	T	0.318607	ENSG00000253111	5.12e-05	PUBMEDID:19107115	Major depressive disorder
lincRNA	rs2980876	chr8	126481694	C	T	0.318607	ENSG00000253111	1.85e-05	PUBMEDID:20125193	Cognitive test performance
lincRNA	rs2980879	chr8	126481475	A	T	0.318087	ENSG00000253111	1e-09	PUBMEDID:22479202	Adiponectin levels
lincRNA	rs2989476	chr1	61059259	G	C	0.566008	ENSG00000226476	3e-06	PUBMEDID:21738484	Bipolar disorder
lincRNA	rs3102947	chr2	8434185	G	C	0.141892	ENSG00000236790	2e-07	PUBMEDID:22075330	IgE levels
lincRNA	rs3104767	chr16	52624738	G	T	0.568087	ENSG00000249231	9e-19	PUBMEDID:21779176	Restless legs syndrome
lincRNA	rs3104891	chr8	96524316	T	G	0.898649	ENSG00000253872	2.04e-05	PUBMEDID:19734545	Cognitive performance
lincRNA	rs3112612	chr16	52635164	G	A	0.565489	ENSG00000249231	4e-10	PUBMEDID:21263130	Breast cancer
lincRNA	rs3121685	chr5	65662133	C	T	0.522349	ENSG00000251391	2e-05	PUBMEDID:19430483	Systolic blood pressure
lincRNA	rs312351	chr4	19262843	C	T	0.532744	ENSG00000248238	7.67e-05	PUBMEDID:19043545	Serum metabolites
lincRNA	rs312353	chr4	19262251	C	T	0.532744	ENSG00000248238	4.13e-05	PUBMEDID:19043545	Serum metabolites
lincRNA	rs3132685	chr6	29945949	G	A	0.899168	ENSG00000204625	8.98e-06	PUBMEDID:19115949	AIDS progression
lincRNA	rs3132685	chr6	29945949	G	A	0.899168	ENSG00000204625	1.38e-07	PUBMEDID:19654303	Lung cancer
lincRNA	rs318576	chr7	34285221	A	G	0.307173	ENSG00000236212	4.33e-05	PUBMEDID:19270707	Nonsyndromic cleft lip with or without cleft palate
lincRNA	rs326235	chr5	103969462	C	T	0.711538	ENSG00000251574	2.01e-06	PUBMEDID:19043545	Serum metabolites
lincRNA	rs331645	chr1	59637387	G	A	0.485967	ENSG00000224609	3.06e-05	PUBMEDID:19684573	Response to hepatitis C treatment
lincRNA	rs368758	chr5	38063061	G	A	0.724532	ENSG00000250003	7.55e-05	PUBMEDID:20038947	Major depressive disorder (broad)
lincRNA	rs3764563	chr19	15724203	A	G	0.0945946	ENSG00000266951	3e-07	PUBMEDID:22228203	Inflammatory biomarkers
lincRNA	rs3813579	chr16	79749276	G	A	0.450104	ENSG00000260876	4e-10	PUBMEDID:21565293	Thyroid volume
lincRNA	rs3813582	chr16	79749353	T	C	0.669439	ENSG00000260876	6e-10	PUBMEDID:22494929	Thyroid function
lincRNA	rs382847	chr9	93724431	C	T	0.242204	ENSG00000228216	3.92e-05	PUBMEDID:18957941	Personality dimensions
lincRNA	rs3846145	chr3	3307984	A	G	0.568607	ENSG00000223727	3.75e-05	PUBMEDID:20125193	Cognitive test performance
lincRNA	rs3848445	chr17	14294021	C	T	0.0358628	ENSG00000230647	8e-09	PUBMEDID:18464913	Protein quantitative trait loci
lincRNA	rs387013	chr5	104023020	A	T	0.713617	ENSG00000251574	1.48e-06	PUBMEDID:19043545	Serum metabolites
lincRNA	rs3896178	chr1	61061996	G	A	0.732328	ENSG00000226476	4.62e-05	PUBMEDID:19043545	Serum metabolites
lincRNA	rs3903239	chr1	170569317	A	G	0.589917	ENSG00000235303	8e-14	PUBMEDID:22544366	Atrial fibrillation
lincRNA	rs3904775	chr13	74076138	A	G	0.243243	ENSG00000224853	2.85e-06	PUBMEDID:19043545	Serum metabolites
lincRNA	rs3913141	chr12	23193102	G	A	0.432432	ENSG00000256995	9.73e-05	PUBMEDID:19581569	Alcohol dependence
lincRNA	rs407240	chr5	104022314	G	T	0.68815	ENSG00000251574	7.49e-06	PUBMEDID:19043545	Serum metabolites
lincRNA	rs4140883	chr2	59079538	C	T	0.963098	ENSG00000233723	5.91e-05	PUBMEDID:19734545	Cognitive performance
lincRNA	rs4147141	chr1	69579252	G	A	0.378378	ENSG00000223883	6e-06	PUBMEDID:18821565	Attention deficit hyperactivity disorder
lincRNA	rs416350	chr12	68779413	G	A	0.949064	ENSG00000251301	4e-08	PUBMEDID:22365631	Temperament-related traits
lincRNA	rs420017	chr15	89617081	C	T	0.426715	ENSG00000260123	7e-06	PUBMEDID:21998595	Height
lincRNA	rs4235565	chr5	7001842	G	A	0.31341	ENSG00000250974	1.6e-05	PUBMEDID:19043545	Serum metabolites
lincRNA	rs4244644	chr1	54883163	C	T	0.512474	ENSG00000232245	9.65e-05	PUBMEDID:19846067	Response to citalopram treatment
lincRNA	rs4245354	chr13	51738988	C	G	0.340437	ENSG00000226792	3.98e-05	PUBMEDID:19043545	Serum metabolites
lincRNA	rs425956	chr7	114719858	T	C	0.690748	ENSG00000225535	5.4e-05	PUBMEDID:20125193	Cognitive test performance
lincRNA	rs4306451	chr15	68157881	A	G	0.559252	ENSG00000259410	4.9e-05	PUBMEDID:20125193	Cognitive test performance
lincRNA	rs4316684	chr14	97587036	C	A	0.852391	ENSG00000258393	3.81e-05	PUBMEDID:19734545	Cognitive performance
lincRNA	rs4328484	chr17	69116230	G	A	0.642412	ENSG00000260785	5.91e-05	PUBMEDID:20010835	Pulmonary function
lincRNA	rs4332164	chr8	112238390	A	G	0.132017	ENSG00000253103	2.52e-05	PUBMEDID:20125193	Cognitive test performance
lincRNA	rs4351435	chr8	126499878	G	A	0.317048	ENSG00000253111	4.8e-05	PUBMEDID:20442857	Lipoprotein-associated phospholipase A2 activity and mass
lincRNA	rs4395051	chr15	92087895	G	C	0.388254	ENSG00000258551	6.61e-05	PUBMEDID:19043545	Serum metabolites
lincRNA	rs4413560	chr5	38090806	G	C	0.277027	ENSG00000250003	9.71e-05	PUBMEDID:20038947	Major depressive disorder (broad)
lincRNA	rs4469412	chr8	33565378	G	A	0.929834	ENSG00000253642	9e-07	PUBMEDID:22542470	Immune response to smallpox vaccine
lincRNA	rs4489981	chr15	91979779	T	C	0.516632	ENSG00000258551	1.3e-05	PUBMEDID:19754311	AIDS
lincRNA	rs4503880	chr18	56084054	T	C	0.204262	ENSG00000267675	3e-12	PUBMEDID:22001757	Liver enzyme levels (gamma-glutamyl transferase)
lincRNA	rs4509991	chr15	92088041	G	A	0.389813	ENSG00000258551	5.24e-05	PUBMEDID:19043545	Serum metabolites
lincRNA	rs4539517	chr14	46583668	A	G	0.532744	ENSG00000258700	8.64e-05	PUBMEDID:19043545	Serum metabolites
lincRNA	rs4542987	chr3	25174769	T	C	0.465696	ENSG00000237838	3.37e-05	PUBMEDID:19043545	Serum metabolites
lincRNA	rs4560424	chr4	128139132	C	G	0.712578	ENSG00000248491	9.94e-05	PUBMEDID:19043545	Serum metabolites
lincRNA	rs4668486	chr2	16243192	A	C	0.22973	ENSG00000236989	4.33e-05	PUBMEDID:19525953	Multiple sclerosis
lincRNA	rs4679576	chr3	59470877	A	T	0.411123	ENSG00000242545	8.15e-05	PUBMEDID:19043545	Serum metabolites
lincRNA	rs4684396	chr3	3614418	T	C	0.795218	ENSG00000223727	7e-06	PUBMEDID:18957941	Personality dimensions
lincRNA	rs4686914	chr3	187717540	C	T	0.690748	ENSG00000225058	3e-21	PUBMEDID:21909109	Metabolite levels
lincRNA	rs4702982	chr5	99991648	C	T	0.892931	ENSG00000250806	6e-06	PUBMEDID:19165232	Panic disorder
lincRNA	rs470382	chr6	10474951	T	A	0.998441	ENSG00000231056	5.59e-05	PUBMEDID:19846067	Response to citalopram treatment
lincRNA	rs474103	chr1	59619571	T	G	0.484407	ENSG00000224609	6.42e-05	PUBMEDID:19684573	Response to hepatitis C treatment
lincRNA	rs4743564	chr9	105347447	C	A	0.910603	ENSG00000204250	7.55e-05	PUBMEDID:19734545	Cognitive performance
lincRNA	rs4751815	chr10	122701505	G	A	0.551455	ENSG00000227307	2.4e-05	PUBMEDID:19396169	Height
lincRNA	rs4752485	chr10	122720974	C	T	0.273909	ENSG00000227307	7e-06	PUBMEDID:22424883	Pulmonary function decline
lincRNA	rs4756770	chr11	13869220	A	T	0.432432	ENSG00000254927	3.74e-05	PUBMEDID:19043545	Serum metabolites
lincRNA	rs4777845	chr15	93877425	T	C	0.965696	ENSG00000257060	9e-06	PUBMEDID:22479202	Adiponectin levels
lincRNA	rs4783227	chr16	82594383	T	C	0.409563	ENSG00000261176	4e-07	PUBMEDID:20195266	Response to antipsychotic treatment
lincRNA	rs4784227	chr16	52599188	C	T	0.752079	ENSG00000249231	1e-28	PUBMEDID:20585626	Breast cancer
lincRNA	rs4792394	chr17	13684917	C	A	0.485967	ENSG00000236088	9e-06	PUBMEDID:20585324	Conduct disorder (symptom count)
lincRNA	rs4793528	chr17	69110773	A	G	0.641892	ENSG00000260785	4.73e-05	PUBMEDID:20010835	Pulmonary function
lincRNA	rs480878	chr11	116522854	G	A	0.893971	ENSG00000237937	7.99e-09	PUBMEDID:19060911	Triglycerides
lincRNA	rs482329	chr1	234816554	G	C	0.37474	ENSG00000230628	6e-06	PUBMEDID:22247754	Life threatening arrhythmia
lincRNA	rs4837521	chr9	120654461	T	C	0.330561	ENSG00000231901	2.31e-05	PUBMEDID:19043545	Serum metabolites
lincRNA	rs4846446	chr1	218075115	G	A	0.70842	ENSG00000231814	9.58e-05	PUBMEDID:19043545	Serum metabolites
lincRNA	rs4871750	chr8	127902003	G	A	0.522349	ENSG00000253438	4.9e-05	PUBMEDID:20125193	Cognitive test performance
lincRNA	rs4894243	chr2	177962141	C	T	0.39657	ENSG00000236501	7.46e-05	PUBMEDID:19581569	Alcohol dependence
lincRNA	rs4899845	chr14	41435213	G	A	0.899688	ENSG00000251363	3.5e-05	PUBMEDID:19448189	Response to lithium treatment in bipolar disorder
lincRNA	rs4901869	chr14	59334128	A	G	0.627339	ENSG00000258583	6e-06	PUBMEDID:19165232	Panic disorder
lincRNA	rs4906844	chr15	26277545	A	G	0.440229	ENSG00000206187	1e-08	PUBMEDID:21810643	Entorhinal cortical thickness
lincRNA	rs4942969	chr13	51738888	T	C	0.730769	ENSG00000226792	1.58e-05	PUBMEDID:19043545	Serum metabolites
lincRNA	rs4951039	chr1	204006597	G	A	0.129938	ENSG00000176754	5.8e-06	PUBMEDID:19011631	Colorectal cancer
lincRNA	rs4951291	chr1	204006538	T	C	0.129418	ENSG00000176754	5.3e-06	PUBMEDID:19011631	Colorectal cancer
lincRNA	rs4965180	chr15	97915636	G	A	0.143971	ENSG00000259485	6.2e-05	PUBMEDID:18957941	Personality dimensions
lincRNA	rs4981674	chr14	29070385	C	A	0.460499	ENSG00000258175	2.38e-05	PUBMEDID:20125193	Cognitive test performance
lincRNA	rs4983306	chr14	29067027	C	T	0.275468	ENSG00000258175	9.66e-05	PUBMEDID:19754311	AIDS
lincRNA	rs502025	chr5	104022597	C	T	0.713617	ENSG00000251574	1.48e-06	PUBMEDID:19043545	Serum metabolites
lincRNA	rs574427	chr4	17187440	G	A	0.273389	ENSG00000250819	5.9e-05	PUBMEDID:20125193	Cognitive test performance
lincRNA	rs576547	chr5	104028909	G	A	0.0738046	ENSG00000251574	9.77e-05	PUBMEDID:19010793	Multiple sclerosis (age of onset)
lincRNA	rs587334	chr11	90350730	T	G	0.70738	ENSG00000261645	8.61e-05	PUBMEDID:19084217	Serum markers of iron status
lincRNA	rs6017291	chr20	42854134	A	G	0.926715	ENSG00000223891	6e-06	PUBMEDID:20125193	Cognitive test performance
lincRNA	rs607558	chr11	81889023	C	T	0.889813	ENSG00000245832	6.8e-05	PUBMEDID:18957941	Personality dimensions
lincRNA	rs6085920	chr20	7180056	T	A	0.0930353	ENSG00000228888	6e-06	PUBMEDID:18759275	Serum uric acid
lincRNA	rs611802	chr6	142866387	A	C	0.688669	ENSG00000236366	4.94e-08	PUBMEDID:20010835	Pulmonary function
lincRNA	rs6134717	chr20	12890206	G	A	0.922037	ENSG00000233048	3.35e-05	PUBMEDID:20125193	Cognitive test performance
lincRNA	rs644695	chr3	177291697	A	G	0.851351	ENSG00000228221	4.46e-06	PUBMEDID:20038947	Major depressive disorder (broad)
lincRNA	rs6465004	chr7	85056906	T	C	0.612266	ENSG00000225128	7.1e-07	PUBMEDID:19734903	Alzheimer`s disease
lincRNA	rs6473185	chr8	80782703	A	G	0.952183	ENSG00000249328	7.4e-05	PUBMEDID:20125193	Cognitive test performance
lincRNA	rs649461	chr11	81909788	C	T	0.888773	ENSG00000245832	6.7e-05	PUBMEDID:18957941	Personality dimensions
lincRNA	rs6501685	chr17	72048075	C	T	0.885655	ENSG00000266357	6.12e-06	PUBMEDID:19571811	Schizophrenia
lincRNA	rs6508329	chr18	22365168	G	A	0.782744	ENSG00000266573	3.2e-06	PUBMEDID:19846067	Response to citalopram treatment
lincRNA	rs652732	chr11	81896531	A	C	0.888773	ENSG00000245832	6.8e-05	PUBMEDID:18957941	Personality dimensions
lincRNA	rs6543833	chr2	34631032	C	G	0.346154	ENSG00000226785	8e-08	PUBMEDID:22116950	Ovarian reserve
lincRNA	rs6555306	chr5	4671383	T	C	0.126819	ENSG00000248973	5.66e-05	PUBMEDID:20125193	Cognitive test performance
lincRNA	rs6572335	chr14	46434585	A	G	0.496881	ENSG00000258700	9.3e-07	PUBMEDID:19465909	Malaria
lincRNA	rs6601299	chr8	9184691	T	C	0.0961538	ENSG00000254235	1e-08	PUBMEDID:21347282	Coronary heart disease
lincRNA	rs6651252	chr8	129567181	T	C	0.878378	ENSG00000254275	4e-18	PUBMEDID:21102463	Crohn`s disease
lincRNA	rs6708860	chr2	34333297	G	A	0.397609	ENSG00000203386	5.59e-05	PUBMEDID:20125193	Cognitive test performance
lincRNA	rs6711736	chr2	34284984	G	A	0.610707	ENSG00000203386	3e-10	PUBMEDID:19421330	Hypertension (young onset)
lincRNA	rs6716455	chr2	151126403	G	A	0.85447	ENSG00000230645	7e-07	PUBMEDID:21529783	Alcoholism (alcohol use disorder factor score)
lincRNA	rs6718520	chr2	43325570	A	G	0.466216	ENSG00000230587	3e-08	PUBMEDID:22190364	Multiple sclerosis
lincRNA	rs6729869	chr2	34285194	T	A	0.609667	ENSG00000203386	3e-10	PUBMEDID:19421330	Hypertension (young onset)
lincRNA	rs6735294	chr2	22742356	T	C	0.455821	ENSG00000231200	7.12e-05	PUBMEDID:19571809	Schizophrenia
lincRNA	rs6741194	chr2	22616209	G	T	0.848233	ENSG00000231200	1.73e-05	PUBMEDID:19571809	Schizophrenia
lincRNA	rs6749647	chr2	22618537	G	T	0.838877	ENSG00000231200	4.72e-05	PUBMEDID:19571809	Schizophrenia
lincRNA	rs6761309	chr2	8520508	G	A	0.611227	ENSG00000236790	2.92e-05	PUBMEDID:19043545	Serum metabolites
lincRNA	rs6772601	chr3	59472325	T	G	0.410603	ENSG00000242545	2.93e-05	PUBMEDID:19043545	Serum metabolites
lincRNA	rs6779328	chr3	25017218	T	C	0.549896	ENSG00000237838	2.92e-06	PUBMEDID:19571811	Schizophrenia
lincRNA	rs6780771	chr3	59475736	A	G	0.411123	ENSG00000242545	3.88e-05	PUBMEDID:19043545	Serum metabolites
lincRNA	rs6804502	chr3	25173349	G	A	0.467256	ENSG00000237838	1.37e-05	PUBMEDID:19043545	Serum metabolites
lincRNA	rs683533	chr11	81886502	G	A	0.889813	ENSG00000245832	6.66e-05	PUBMEDID:18957941	Personality dimensions
lincRNA	rs6843082	chr4	111718067	G	A	0.2079	ENSG00000249519	3e-28	PUBMEDID:20173747	Atrial fibrillation
lincRNA	rs6860531	chr5	173159426	T	C	0.706861	ENSG00000253686	7.77e-05	PUBMEDID:19043545	Serum metabolites
lincRNA	rs6861903	chr5	144823021	A	C	0.733888	ENSG00000248125	7.46e-06	PUBMEDID:19043545	Serum metabolites
lincRNA	rs6862056	chr5	163560093	T	C	0.657484	ENSG00000253331	5.36e-05	PUBMEDID:19571809	Schizophrenia
lincRNA	rs6864800	chr5	107046317	C	A	0.524428	ENSG00000249959	4.71e-05	PUBMEDID:19668339	Hippocampal atrophy
lincRNA	rs6867522	chr5	38058965	T	C	0.810291	ENSG00000250003	7.11e-05	PUBMEDID:20038947	Major depressive disorder (broad)
lincRNA	rs688086	chr11	59797468	G	A	0.882536	ENSG00000255393	8.98e-05	PUBMEDID:18957941	Personality dimensions
lincRNA	rs6883823	chr5	38054327	T	C	0.809771	ENSG00000250003	5.27e-05	PUBMEDID:20038947	Major depressive disorder (broad)
lincRNA	rs6885471	chr5	16379041	A	G	0.718815	ENSG00000248150	6.69e-06	PUBMEDID:19043545	Serum metabolites
lincRNA	rs6891116	chr5	38059375	C	A	0.810291	ENSG00000250003	5.89e-05	PUBMEDID:20038947	Major depressive disorder (broad)
lincRNA	rs6897687	chr5	38051703	T	C	0.809771	ENSG00000250003	5.08e-05	PUBMEDID:20038947	Major depressive disorder (broad)
lincRNA	rs6904029	chr6	29943067	G	A	0.716216	ENSG00000204625	1e-21	PUBMEDID:20410501	Vitiligo
lincRNA	rs6941421	chr6	15089151	T	C	0.585759	ENSG00000234261	6e-06	PUBMEDID:19010793	Multiple sclerosis (severity)
lincRNA	rs6984305	chr8	9178268	A	T	0.10395	ENSG00000254235	2e-10	PUBMEDID:22001757	Liver enzyme levels (alkaline phosphatase)
lincRNA	rs6990641	chr8	16704905	C	T	0.748441	ENSG00000253496	1.36e-05	PUBMEDID:18957941	Personality dimensions
lincRNA	rs7002826	chr8	128364271	G	C	0.594075	ENSG00000253929	9.64e-06	PUBMEDID:19043545	Serum metabolites
lincRNA	rs7007568	chr8	128364906	G	C	0.594075	ENSG00000253929	1.87e-05	PUBMEDID:19043545	Serum metabolites
lincRNA	rs7042201	chr9	82139942	C	T	0.739085	ENSG00000233086	5.81e-05	PUBMEDID:18957941	Personality dimensions
lincRNA	rs7047242	chr9	120651594	C	G	0.330042	ENSG00000231901	1.74e-05	PUBMEDID:19043545	Serum metabolites
lincRNA	rs7081678	chr10	31990623	G	A	0.923077	ENSG00000237797	6e-06	PUBMEDID:20935629	Waist-hip ratio
lincRNA	rs7096430	chr10	92764460	A	G	0.4158	ENSG00000225519	6.6e-05	PUBMEDID:19043545	Serum metabolites
lincRNA	rs7105881	chr11	112456221	T	C	0.390852	ENSG00000254968	3e-07	PUBMEDID:20195266	Response to antipsychotic treatment
lincRNA	rs7150852	chr14	29080047	C	A	0.685551	ENSG00000258175	9.68e-05	PUBMEDID:20125193	Cognitive test performance
lincRNA	rs7152623	chr14	98588321	G	A	0.609667	ENSG00000259097	3e-15	PUBMEDID:22068335	Aortic stiffness
lincRNA	rs7161376	chr14	26389507	T	C	0.878898	ENSG00000257986	1.38e-05	PUBMEDID:20125193	Cognitive test performance
lincRNA	rs7175404	chr15	94036688	A	G	0.857588	ENSG00000257060	6e-07	PUBMEDID:18839057	Attention deficit hyperactivity disorder
lincRNA	rs7191888	chr16	73581058	A	G	0.831601	ENSG00000260848	6e-06	PUBMEDID:19010793	Multiple sclerosis (severity)
lincRNA	rs7201995	chr16	80138134	A	G	0.518191	ENSG00000260706	9.88e-05	PUBMEDID:19043545	Serum metabolites
lincRNA	rs7207095	chr17	80339729	A	G	0.430353	ENSG00000260011	3.64e-05	PUBMEDID:18957941	Personality dimensions
lincRNA	rs7207863	chr17	57537775	A	G	0.798337	ENSG00000265313	5.96e-05	PUBMEDID:19684573	Response to hepatitis C treatment
lincRNA	rs7217319	chr17	38924	T	C	0.391892	ENSG00000262836	4e-06	PUBMEDID:21502085	AIDS progression
lincRNA	rs7228101	chr18	40166871	A	G	0.211538	ENSG00000267586	7.34e-05	PUBMEDID:20038947	Major depressive disorder (broad)
lincRNA	rs7229673	chr18	22346141	C	T	0.775468	ENSG00000266573	4.03e-05	PUBMEDID:19846067	Response to citalopram treatment
lincRNA	rs7236007	chr18	65269343	T	C	0.865904	ENSG00000265533	9.52e-05	PUBMEDID:20038947	Major depressive disorder (broad)
lincRNA	rs7236489	chr18	75252389	C	T	0.769751	ENSG00000264015	8.19e-05	PUBMEDID:18957941	Personality dimensions
lincRNA	rs7238529	chr18	40161451	A	G	0.217775	ENSG00000267586	7.9e-05	PUBMEDID:20038947	Major depressive disorder (broad)
lincRNA	rs7249887	chr19	31849368	C	T	0.858628	ENSG00000267662	4.04e-05	PUBMEDID:20010835	Pulmonary function
lincRNA	rs72669744	chr1	56116505	C	T	0.97817	ENSG00000234810	1e-19	PUBMEDID:22286219	Lipid metabolism phenotypes
lincRNA	rs7283006	chr21	29820563	G	A	0.288981	ENSG00000232855	4.78e-05	PUBMEDID:19043545	Serum metabolites
lincRNA	rs730570	chr14	101142890	G	A	0.136175	ENSG00000258717	8e-06	PUBMEDID:21573907	Type 2 diabetes
lincRNA	rs732839	chr8	9194172	G	A	0.774948	ENSG00000254235	4.93e-05	PUBMEDID:19043545	Serum metabolites
lincRNA	rs735855	chr4	14395318	A	T	0.472973	ENSG00000248425	4.52e-05	PUBMEDID:19043545	Serum metabolites
lincRNA	rs737707	chr8	102083452	A	G	0.991164	ENSG00000248599	6.23e-05	PUBMEDID:19571809	Schizophrenia
lincRNA	rs7420489	chr2	3071419	A	G	0.97921	ENSG00000234423	5.35e-05	PUBMEDID:19734545	Cognitive performance
lincRNA	rs7425561	chr2	8521327	T	A	0.611746	ENSG00000236790	8.51e-05	PUBMEDID:19043545	Serum metabolites
lincRNA	rs7448647	chr5	117532148	G	A	0.752599	ENSG00000249797	5.72e-05	PUBMEDID:19043545	Serum metabolites
lincRNA	rs7504475	chr18	65250728	G	A	0.844595	ENSG00000265533	9.54e-05	PUBMEDID:20038947	Major depressive disorder (broad)
lincRNA	rs7555668	chr1	112856570	C	T	0.741684	ENSG00000231246	3e-06	PUBMEDID:20125193	Cognitive test performance
lincRNA	rs7558139	chr2	12322604	T	C	0.561331	ENSG00000224184	3.11e-05	PUBMEDID:19043545	Serum metabolites
lincRNA	rs7578035	chr2	99382892	T	G	0.492204	ENSG00000226791	3e-06	PUBMEDID:21926972	Bipolar disorder
lincRNA	rs759439	chr4	12949656	G	A	0.376819	ENSG00000250098	2.4e-05	PUBMEDID:19043545	Serum metabolites
lincRNA	rs7600576	chr2	8229484	C	G	0.526507	ENSG00000235665	7.3e-05	PUBMEDID:18957941	Personality dimensions
lincRNA	rs7602460	chr2	182261869	A	G	0.401767	ENSG00000234663	6e-06	PUBMEDID:21041692	Atrioventricular conduction
lincRNA	rs7608117	chr2	11265972	T	G	0.483888	ENSG00000145063	8.91e-05	PUBMEDID:20010835	Pulmonary function
lincRNA	rs7612209	chr3	177596989	G	A	0.348233	ENSG00000231574	4e-06	PUBMEDID:19734545	Cognitive performance
lincRNA	rs762015	chr14	46435484	C	T	0.442308	ENSG00000258700	3.87e-05	PUBMEDID:19043545	Serum metabolites
lincRNA	rs7620213	chr3	59482405	C	T	0.409044	ENSG00000242545	4.06e-05	PUBMEDID:19043545	Serum metabolites
lincRNA	rs7626018	chr3	59474911	T	C	0.410603	ENSG00000242545	3.87e-05	PUBMEDID:19043545	Serum metabolites
lincRNA	rs7632844	chr3	177177991	G	A	0.777547	ENSG00000228221	8.73e-05	PUBMEDID:20125193	Cognitive test performance
lincRNA	rs7675774	chr4	148503298	A	G	0.569127	ENSG00000251688	3.5e-05	PUBMEDID:19043545	Serum metabolites
lincRNA	rs7679673	chr4	106061534	C	A	0.586279	ENSG00000251259	3e-14	PUBMEDID:19767753	Prostate cancer
lincRNA	rs76884941	chr3	111201785	T	G	0.939189	ENSG00000239311	1e-07	PUBMEDID:21685187	Chronic obstructive pulmonary disease
lincRNA	rs7702331	chr5	72551134	A	G	0.598233	ENSG00000249743	6e-12	PUBMEDID:21102463	Crohn`s disease
lincRNA	rs7705924	chr5	101946798	A	G	0.955301	ENSG00000250682	2e-08	PUBMEDID:22412388	Crohn`s disease
lincRNA	rs7719425	chr5	158670938	T	C	0.772869	ENSG00000253315	5.47e-05	PUBMEDID:20442857	Lipoprotein-associated phospholipase A2 activity and mass
lincRNA	rs7722472	chr5	38046009	C	T	0.851871	ENSG00000250003	4.5e-05	PUBMEDID:20038947	Major depressive disorder (broad)
lincRNA	rs7725009	chr5	144813968	T	C	0.743243	ENSG00000248125	6.28e-05	PUBMEDID:19043545	Serum metabolites
lincRNA	rs7727102	chr5	4720585	G	C	0.807173	ENSG00000248973	1e-06	PUBMEDID:20889312	Bipolar disorder and schizophrenia
lincRNA	rs7734812	chr5	20642907	T	G	0.483888	ENSG00000251629	7.53e-05	PUBMEDID:19043545	Serum metabolites
lincRNA	rs773823	chr2	34115251	T	C	0.147609	ENSG00000203386	7.1e-05	PUBMEDID:19448189	Response to lithium treatment in bipolar disorder
lincRNA	rs7759803	chr6	30812519	G	A	0.975052	ENSG00000237923	2.31e-08	PUBMEDID:20526339	Vitiligo
lincRNA	rs7770731	chr6	14598820	T	C	0.782744	ENSG00000229646	1e-06	PUBMEDID:21107309	Working memory
lincRNA	rs7811056	chr7	19476939	G	A	0.486486	ENSG00000223838	5.69e-05	PUBMEDID:20125193	Cognitive test performance
lincRNA	rs7811230	chr7	110144415	G	A	0.698545	ENSG00000226965	2.72e-05	PUBMEDID:19684573	Response to hepatitis C treatment
lincRNA	rs7812739	chr8	137620090	T	C	0.97869	ENSG00000254101	5.93e-05	PUBMEDID:20125193	Cognitive test performance
lincRNA	rs7815091	chr8	137595285	G	A	0.977651	ENSG00000254101	5.93e-05	PUBMEDID:20125193	Cognitive test performance
lincRNA	rs7815100	chr8	128376801	T	C	0.594075	ENSG00000253929	1.32e-05	PUBMEDID:19043545	Serum metabolites
lincRNA	rs7821595	chr8	20881539	A	G	0.574324	ENSG00000254040	8.27e-05	PUBMEDID:19043545	Serum metabolites
lincRNA	rs7822510	chr8	877433	A	C	0.780665	ENSG00000237647	2.51e-05	PUBMEDID:19010793	Multiple sclerosis (age of onset)
lincRNA	rs7833393	chr8	33536037	A	G	0.590956	ENSG00000253642	1.26e-05	PUBMEDID:19043545	Serum metabolites
lincRNA	rs7840674	chr8	33471273	T	C	0.555094	ENSG00000253642	9.15e-05	PUBMEDID:19043545	Serum metabolites
lincRNA	rs7844723	chr8	122908503	C	T	0.427755	ENSG00000254018	2e-06	PUBMEDID:17903294	Hemostatic factors and hematological phenotypes
lincRNA	rs7902136	chr10	80066799	A	G	0.641892	ENSG00000227136	9.52e-05	PUBMEDID:19043545	Serum metabolites
lincRNA	rs7915941	chr10	92168557	C	T	0.465177	ENSG00000236373	1.93e-05	PUBMEDID:19043545	Serum metabolites
lincRNA	rs7924096	chr10	5652237	G	C	0.653326	ENSG00000231483	3.39e-05	PUBMEDID:19043545	Serum metabolites
lincRNA	rs7924096	chr10	5652237	G	C	0.653326	ENSG00000231483	4.4e-05	PUBMEDID:19465909	Malaria
lincRNA	rs7961201	chr12	74749476	G	A	0.924636	ENSG00000251138	5.04e-05	PUBMEDID:20010835	Pulmonary function
lincRNA	rs7963521	chr12	73828956	C	T	0.398129	ENSG00000258109	9e-06	PUBMEDID:20237162	Plasma chemerin levels
lincRNA	rs7965584	chr12	90305779	A	G	0.698025	ENSG00000258216	1e-16	PUBMEDID:20700443	Serum magnesium levels
lincRNA	rs7983230	chr13	30942955	G	A	0.711019	ENSG00000238121	9.3e-05	PUBMEDID:19043545	Serum metabolites
lincRNA	rs8017858	chr14	46741726	A	G	0.776507	ENSG00000258700	9.91e-05	PUBMEDID:20442857	Lipoprotein-associated phospholipase A2 activity and mass
lincRNA	rs8097348	chr18	1595021	G	A	0.238046	ENSG00000266602	7e-06	PUBMEDID:19727025	Exercise (leisure time)
lincRNA	rs831179	chr5	16384646	G	A	0.529626	ENSG00000248150	3.26e-05	PUBMEDID:19043545	Serum metabolites
lincRNA	rs851340	chr2	19369285	A	T	0.251559	ENSG00000236204	6.74e-05	PUBMEDID:19043545	Serum metabolites
lincRNA	rs857228	chr14	98670158	A	C	0.444387	ENSG00000259097	3e-06	PUBMEDID:22445761	Sexual dysfunction (SSRI/SNRI-related)
lincRNA	rs857229	chr14	98670924	C	T	0.227651	ENSG00000259097	1.87e-05	PUBMEDID:20125193	Cognitive test performance
lincRNA	rs858870	chr14	46666812	A	C	0.338358	ENSG00000258700	1.46e-05	PUBMEDID:19043545	Serum metabolites
lincRNA	rs868243	chr3	6120442	G	A	0.50104	ENSG00000229642	8.96e-05	PUBMEDID:19043545	Serum metabolites
lincRNA	rs874445	chr5	173136650	C	A	0.691788	ENSG00000253686	8.15e-06	PUBMEDID:19043545	Serum metabolites
lincRNA	rs887802	chr17	70491063	T	C	0.553534	ENSG00000227036	7.67e-05	PUBMEDID:19043545	Serum metabolites
lincRNA	rs890082	chr2	21693244	T	C	0.950624	ENSG00000231204	2.21e-05	PUBMEDID:19734545	Cognitive performance
lincRNA	rs892459	chr2	21584340	G	C	0.649688	ENSG00000231204	8.64e-05	PUBMEDID:19043545	Serum metabolites
lincRNA	rs901469	chr1	96723560	A	G	0.913202	ENSG00000231987	5.71e-05	PUBMEDID:20125193	Cognitive test performance
lincRNA	rs91166	chr2	14081905	T	C	0.493243	ENSG00000230448	9.79e-05	PUBMEDID:19043545	Serum metabolites
lincRNA	rs918959	chr2	181513729	G	A	0.919958	ENSG00000225258	2e-06	PUBMEDID:21408207	Systemic lupus erythematosus
lincRNA	rs9305354	chr21	29475196	C	T	0.848753	ENSG00000232079	8e-06	PUBMEDID:17903292	Urinary albumin excretion
lincRNA	rs9306430	chr22	27316435	C	T	0.831081	ENSG00000235271	3.15e-05	PUBMEDID:20125193	Cognitive test performance
lincRNA	rs9308490	chr1	232308565	G	C	0.31289	ENSG00000235152	7.84e-06	PUBMEDID:19043545	Serum metabolites
lincRNA	rs9308945	chr2	34284852	A	G	0.610707	ENSG00000203386	3e-10	PUBMEDID:19421330	Hypertension (young onset)
lincRNA	rs9314986	chr13	30458737	G	T	0.318087	ENSG00000224329	2e-06	PUBMEDID:20460270	Biliary atresia
lincRNA	rs9321453	chr6	134773554	T	C	0.299376	ENSG00000231971	1e-09	PUBMEDID:21768215	Serum urate
lincRNA	rs9326038	chr1	56326293	G	A	0.260915	ENSG00000233147	5.56e-06	PUBMEDID:19043545	Serum metabolites
lincRNA	rs9364827	chr6	166393047	C	T	0.948025	ENSG00000223414	2.98e-05	PUBMEDID:20125193	Cognitive test performance
lincRNA	rs938906	chr2	231555684	T	C	0.221933	ENSG00000226125	4.23e-05	PUBMEDID:19734545	Cognitive performance
lincRNA	rs941576	chr14	101306045	A	G	0.557692	ENSG00000214548	1e-10	PUBMEDID:19966805	Type 1 diabetes
lincRNA	rs9481344	chr6	113684429	C	T	0.99896	ENSG00000223811	7.28e-05	PUBMEDID:19609347	Hypertension
lincRNA	rs949790	chr2	21449987	G	A	0.774428	ENSG00000233005	2.37e-09	PUBMEDID:19060911	Triglycerides
lincRNA	rs956225	chr8	122909687	A	G	0.838877	ENSG00000254018	9e-06	PUBMEDID:22159054	Alzheimer`s disease
lincRNA	rs9563030	chr13	51741276	A	G	0.693347	ENSG00000226792	8.98e-06	PUBMEDID:19043545	Serum metabolites
lincRNA	rs9614845	chr22	45014135	C	T	0.920478	ENSG00000234300	4.8e-05	PUBMEDID:19734545	Cognitive performance
lincRNA	rs9638917	chr7	36094620	G	T	0.91684	ENSG00000232930	8.51e-05	PUBMEDID:19010793	Brain lesion load
lincRNA	rs9653442	chr2	100825367	C	T	0.481809	ENSG00000232084	5e-06	PUBMEDID:17554260	Type 1 diabetes
lincRNA	rs9657451	chr8	138905296	A	G	0.127859	ENSG00000253288	1.92e-06	PUBMEDID:20125193	Cognitive test performance
lincRNA	rs966744	chr2	199809716	G	A	0.700624	ENSG00000231557	6.23e-05	PUBMEDID:19734545	Cognitive performance
lincRNA	rs9674957	chr17	69111098	G	A	0.628378	ENSG00000260785	4.5e-05	PUBMEDID:20010835	Pulmonary function
lincRNA	rs974819	chr11	103660567	T	C	0.301975	ENSG00000254987	2e-09	PUBMEDID:21378988	Coronary heart disease
lincRNA	rs9788634	chr15	97921075	T	C	0.873181	ENSG00000259485	3.09e-05	PUBMEDID:19010793	Multiple sclerosis (age of onset)
lincRNA	rs9820070	chr3	187687074	A	C	0.613306	ENSG00000224187	1e-11	PUBMEDID:20139978	Hematological and biochemical traits
lincRNA	rs9826014	chr3	25040502	T	A	0.2921	ENSG00000237838	5.25e-05	PUBMEDID:19043545	Serum metabolites
lincRNA	rs982842	chr8	139069173	A	G	0.445426	ENSG00000253288	7.85e-05	PUBMEDID:20125193	Cognitive test performance
lincRNA	rs9848344	chr3	73869793	G	A	0.47817	ENSG00000242741	8e-05	PUBMEDID:19465909	Malaria
lincRNA	rs9853202	chr3	24788904	G	T	0.432952	ENSG00000237838	6.86e-05	PUBMEDID:19043545	Serum metabolites
lincRNA	rs9854706	chr3	3301678	C	T	0.588877	ENSG00000223727	3.35e-05	PUBMEDID:20125193	Cognitive test performance
lincRNA	rs9860340	chr3	87783976	A	G	0.761435	ENSG00000239572	4e-06	PUBMEDID:22554406	Electroencephalographic traits in alcoholism
lincRNA	rs9862576	chr3	59491566	C	T	0.407484	ENSG00000242545	2.51e-05	PUBMEDID:19043545	Serum metabolites
lincRNA	rs9908887	chr17	60904812	A	G	0.555613	ENSG00000265000	7.35e-05	PUBMEDID:19043545	Serum metabolites
lincRNA	rs9913711	chr17	70098161	G	C	0.349272	ENSG00000234899	1e-09	PUBMEDID:22001757	Liver enzyme levels (gamma-glutamyl transferase)
lincRNA	rs991964	chr2	59282591	T	C	0.534823	ENSG00000233723	9e-06	PUBMEDID:21460842	Uterine fibroids
lincRNA	rs992701	chr4	138133137	A	G	0.490644	ENSG00000248869	5.43e-05	PUBMEDID:19043545	Serum metabolites
lincRNA	rs993804	chr3	25112171	C	T	0.253119	ENSG00000237838	1e-06	PUBMEDID:20889312	Bipolar disorder and schizophrenia
lincRNA	rs9941446	chr18	65481053	G	A	0.904366	ENSG00000265533	4.5e-05	PUBMEDID:19684573	Response to hepatitis C treatment
lincRNA	rs9964460	chr18	40156291	G	A	0.217256	ENSG00000267586	8.12e-05	PUBMEDID:20038947	Major depressive disorder (broad)
lincRNA	rs9967777	chr2	34517688	C	G	0.684511	ENSG00000203386	3.3e-05	PUBMEDID:19448189	Response to lithium treatment in bipolar disorder
lincRNA	rs9977253	chr21	26645083	C	T	0.334719	ENSG00000222042	5e-06	PUBMEDID:20708005	Non-alcoholic fatty liver disease histology (other)
lincRNA	rs9977499	chr21	28734997	C	T	0.393451	ENSG00000236332	4e-06	PUBMEDID:21546767	Dialysis-related mortality
lincRNA	rs9981885	chr21	20330637	A	C	0.883576	ENSG00000226204	1e-08	PUBMEDID:19060907	Fasting plasma glucose
lincRNA	rs9987289	chr8	9183358	A	G	0.0831601	ENSG00000254235	3e-13	PUBMEDID:21300955	C-reactive protein
lincRNA	rs9987289	chr8	9183358	A	G	0.0831601	ENSG00000254235	1e-08	PUBMEDID:21386085	HDL Cholesterol - Triglycerides (HDLC-TG)
miRNA_precursor	rs174561	chr11	61582708	C	T	0.721414	hsa-mir-1908	4.93e-266	PUBMEDID:22286219	Metabolite levels
miRNA_precursor	rs17797090	chr12	104324266	G	A	0.0925156	hsa-mir-3652	1.64e-05	PUBMEDID:19836008	Lung adenocarcinoma
miRNA_precursor	rs243080	chr2	60614572	G	A	0.451143	hsa-mir-4432	2.7e-08	PUBMEDID:17767159	Adult fetal hemoblogbin levels (HbF) by F cell levels
miRNA_precursor	rs243080	chr2	60614572	G	A	0.451143	hsa-mir-4432	4.02e-09	PUBMEDID:19862010	Other erythrocyte phenotypes
piRNA	rs10001106	chr4	10127441	C	T	0.630977	chr4_10114931_10157431	1.92e-38	PUBMEDID:19503597	Serum uric acid
piRNA	rs10009493	chr4	10132047	C	G	0.199584	chr4_10114931_10157431	5.05e-122	PUBMEDID:19503597	Serum uric acid
piRNA	rs10012288	chr4	10140953	G	A	0.470894	chr4_10114931_10157431	9.69e-11	PUBMEDID:19503597	Serum uric acid
piRNA	rs10015494	chr4	10141990	G	A	0.471414	chr4_10114931_10157431	9.6e-11	PUBMEDID:19503597	Serum uric acid
piRNA	rs10015872	chr4	10142410	G	A	0.470894	chr4_10114931_10157431	6.55e-10	PUBMEDID:19503597	Serum uric acid
piRNA	rs10020887	chr4	10140751	C	G	0.198025	chr4_10114931_10157431	2.9e-120	PUBMEDID:19503597	Serum uric acid
piRNA	rs10022911	chr4	10140551	A	G	0.198025	chr4_10114931_10157431	4.71e-113	PUBMEDID:19503597	Serum uric acid
piRNA	rs10025456	chr4	10140259	T	C	0.453742	chr4_10114931_10157431	7.63e-09	PUBMEDID:19503597	Serum uric acid
piRNA	rs10028503	chr4	10141927	G	A	0.527547	chr4_10114931_10157431	1.91e-10	PUBMEDID:19503597	Serum uric acid
piRNA	rs10028937	chr4	10142366	A	G	0.470894	chr4_10114931_10157431	1.99e-10	PUBMEDID:19503597	Serum uric acid
piRNA	rs10031453	chr4	10142659	G	A	0.529106	chr4_10114931_10157431	6.73e-11	PUBMEDID:19503597	Serum uric acid
piRNA	rs10516201	chr4	10123941	T	C	0.25052	chr4_10114931_10157431	2.75e-37	PUBMEDID:19503597	Serum uric acid
piRNA	rs10805356	chr4	10141602	G	T	0.528586	chr4_10114931_10157431	8.73e-11	PUBMEDID:19503597	Serum uric acid
piRNA	rs10939710	chr4	10116801	T	C	0.285863	chr4_10114931_10157431	1.21e-10	PUBMEDID:19503597	Serum uric acid
piRNA	rs10939722	chr4	10139047	T	G	0.532225	chr4_10114931_10157431	1.69e-10	PUBMEDID:19503597	Serum uric acid
piRNA	rs10939723	chr4	10139105	G	T	0.194387	chr4_10114931_10157431	1.68e-108	PUBMEDID:19503597	Serum uric acid
piRNA	rs10939730	chr4	10146049	C	G	0.530146	chr4_10114931_10157431	5.15e-10	PUBMEDID:19503597	Serum uric acid
piRNA	rs10939732	chr4	10148390	G	A	0.469854	chr4_10114931_10157431	6.91e-10	PUBMEDID:19503597	Serum uric acid
piRNA	rs1109472	chr4	10134448	G	C	0.266112	chr4_10114931_10157431	8.75e-45	PUBMEDID:19503597	Serum uric acid
piRNA	rs11721682	chr4	10151147	C	T	0.209979	chr4_10114931_10157431	1.07e-116	PUBMEDID:19503597	Serum uric acid
piRNA	rs11722989	chr4	10126139	G	A	0.522869	chr4_10114931_10157431	1.24e-47	PUBMEDID:19503597	Serum uric acid
piRNA	rs11723016	chr4	10126189	A	G	0.476611	chr4_10114931_10157431	4.68e-45	PUBMEDID:19503597	Serum uric acid
piRNA	rs11732828	chr4	10138746	C	T	0.532225	chr4_10114931_10157431	1.46e-10	PUBMEDID:19503597	Serum uric acid
piRNA	rs11735668	chr4	10148655	C	G	0.201663	chr4_10114931_10157431	1.46e-109	PUBMEDID:19503597	Serum uric acid
piRNA	rs11929718	chr4	10156321	C	A	0.634615	chr4_10114931_10157431	1.45e-47	PUBMEDID:19503597	Serum uric acid
piRNA	rs11938608	chr4	10135849	C	T	0.716216	chr4_10114931_10157431	3.03e-44	PUBMEDID:19503597	Serum uric acid
piRNA	rs12374320	chr4	10120609	C	T	0.362786	chr4_10114931_10157431	3.14e-08	PUBMEDID:19503597	Serum uric acid
piRNA	rs12498927	chr4	10115523	A	G	0.531705	chr4_10114931_10157431	5.24e-61	PUBMEDID:19503597	Serum uric acid
piRNA	rs12501597	chr4	10132137	G	T	0.27183	chr4_10114931_10157431	5.66e-42	PUBMEDID:19503597	Serum uric acid
piRNA	rs12502556	chr4	10130505	C	G	0.265073	chr4_10114931_10157431	4.87e-45	PUBMEDID:19503597	Serum uric acid
piRNA	rs12506893	chr4	10123665	C	T	0.25052	chr4_10114931_10157431	2.13e-37	PUBMEDID:19503597	Serum uric acid
piRNA	rs12507586	chr4	10148575	G	A	0.258316	chr4_10114931_10157431	5.29e-45	PUBMEDID:19503597	Serum uric acid
piRNA	rs12507725	chr4	10137790	T	A	0.264033	chr4_10114931_10157431	1.07e-44	PUBMEDID:19503597	Serum uric acid
piRNA	rs12508413	chr4	10148671	G	A	0.258316	chr4_10114931_10157431	4.71e-45	PUBMEDID:19503597	Serum uric acid
piRNA	rs12513376	chr4	10156222	C	T	0.257277	chr4_10114931_10157431	4.87e-41	PUBMEDID:19503597	Serum uric acid
piRNA	rs13294922	chr9	115864525	A	C	0.465177	chr9_115862846_115877346	5.96e-07	PUBMEDID:19043545	Serum metabolites
piRNA	rs17197769	chr4	10134336	C	T	0.264033	chr4_10114931_10157431	5.85e-44	PUBMEDID:19503597	Serum uric acid
piRNA	rs17198113	chr4	10138470	C	T	0.273389	chr4_10114931_10157431	1.23e-42	PUBMEDID:19503597	Serum uric acid
piRNA	rs17198547	chr4	10141419	C	T	0.199064	chr4_10114931_10157431	3.58e-115	PUBMEDID:19503597	Serum uric acid
piRNA	rs17250843	chr4	10127978	C	G	0.203222	chr4_10114931_10157431	5.58e-09	PUBMEDID:19503597	Serum uric acid
piRNA	rs17251963	chr4	10142561	T	C	0.192827	chr4_10114931_10157431	4.92e-125	PUBMEDID:19503597	Serum uric acid
piRNA	rs198846	chr6	26107463	G	A	0.158004	chr6_26103221_26113121	1e-08	PUBMEDID:19820698	Hemoglobin
piRNA	rs198846	chr6	26107463	G	A	0.158004	chr6_26103221_26113121	2e-12	PUBMEDID:21909110	Blood pressure
piRNA	rs198853	chr6	26104096	T	C	0.310291	chr6_26103221_26113121	5.67e-10	PUBMEDID:19503597	Serum uric acid
piRNA	rs2305707	chr15	51569410	A	G	0.135135	chr15_51538108_51600108	7e-07	PUBMEDID:20189936	Height
piRNA	rs3756215	chr4	10121260	A	G	0.251559	chr4_10114931_10157431	1.1e-20	PUBMEDID:19503597	Serum uric acid
piRNA	rs3822236	chr4	10119961	T	G	0.386175	chr4_10114931_10157431	4.4e-63	PUBMEDID:19503597	Serum uric acid
piRNA	rs3886038	chr4	10125255	C	T	0.248441	chr4_10114931_10157431	2.68e-37	PUBMEDID:19503597	Serum uric acid
piRNA	rs4168	chr4	10148609	A	C	0.530146	chr4_10114931_10157431	2.23e-09	PUBMEDID:19503597	Serum uric acid
piRNA	rs4235354	chr4	10122942	C	A	0.373701	chr4_10114931_10157431	6.84e-14	PUBMEDID:19503597	Serum uric acid
piRNA	rs4235355	chr4	10123078	C	A	0.386694	chr4_10114931_10157431	2.61e-60	PUBMEDID:19503597	Serum uric acid
piRNA	rs4235356	chr4	10123106	G	C	0.386175	chr4_10114931_10157431	7.05e-61	PUBMEDID:19503597	Serum uric acid
piRNA	rs4235357	chr4	10137756	C	T	0.531185	chr4_10114931_10157431	4.82e-10	PUBMEDID:19503597	Serum uric acid
piRNA	rs4292329	chr4	10144459	C	G	0.199064	chr4_10114931_10157431	1.17e-08	PUBMEDID:19503597	Serum uric acid
piRNA	rs4315785	chr4	10137607	A	C	0.468815	chr4_10114931_10157431	2.22e-10	PUBMEDID:19503597	Serum uric acid
piRNA	rs4399989	chr4	10137388	A	G	0.530665	chr4_10114931_10157431	2.73e-10	PUBMEDID:19503597	Serum uric acid
piRNA	rs4401449	chr4	10145998	C	T	0.469854	chr4_10114931_10157431	9.66e-10	PUBMEDID:19503597	Serum uric acid
piRNA	rs4444830	chr4	10124819	C	T	0.525468	chr4_10114931_10157431	2.02e-45	PUBMEDID:19503597	Serum uric acid
piRNA	rs4456954	chr4	10124838	G	C	0.190748	chr4_10114931_10157431	3.72e-30	PUBMEDID:19503597	Serum uric acid
piRNA	rs4467562	chr4	10127141	A	G	0.631497	chr4_10114931_10157431	8.84e-39	PUBMEDID:19503597	Serum uric acid
piRNA	rs4473652	chr4	10141617	G	C	0.200104	chr4_10114931_10157431	2.4e-08	PUBMEDID:19503597	Serum uric acid
piRNA	rs4484300	chr4	10145794	G	A	0.469854	chr4_10114931_10157431	3.08e-10	PUBMEDID:19503597	Serum uric acid
piRNA	rs4574408	chr4	10145568	A	G	0.530146	chr4_10114931_10157431	1.23e-09	PUBMEDID:19503597	Serum uric acid
piRNA	rs4604059	chr4	10115065	T	C	0.529106	chr4_10114931_10157431	9.51e-59	PUBMEDID:19503597	Serum uric acid
piRNA	rs4619888	chr4	10126978	A	C	0.27183	chr4_10114931_10157431	4.92e-40	PUBMEDID:19503597	Serum uric acid
piRNA	rs4640669	chr4	10145733	G	A	0.203222	chr4_10114931_10157431	1.35e-116	PUBMEDID:19503597	Serum uric acid
piRNA	rs4697708	chr4	10121189	C	T	0.612786	chr4_10114931_10157431	1.39e-60	PUBMEDID:19503597	Serum uric acid
piRNA	rs4697710	chr4	10122649	C	T	0.62578	chr4_10114931_10157431	9.93e-61	PUBMEDID:19503597	Serum uric acid
piRNA	rs4697713	chr4	10143582	T	C	0.469854	chr4_10114931_10157431	8.97e-10	PUBMEDID:19503597	Serum uric acid
piRNA	rs4697714	chr4	10143786	T	A	0.199064	chr4_10114931_10157431	1.95e-119	PUBMEDID:19503597	Serum uric acid
piRNA	rs4697930	chr4	10143594	G	C	0.529626	chr4_10114931_10157431	3.11e-10	PUBMEDID:19503597	Serum uric acid
piRNA	rs4697931	chr4	10145296	C	T	0.470374	chr4_10114931_10157431	1.41e-10	PUBMEDID:19503597	Serum uric acid
piRNA	rs4697933	chr4	10146493	G	A	0.203742	chr4_10114931_10157431	8.92e-116	PUBMEDID:19503597	Serum uric acid
piRNA	rs4697934	chr4	10149064	T	C	0.530146	chr4_10114931_10157431	6.8e-09	PUBMEDID:19503597	Serum uric acid
piRNA	rs4697936	chr4	10149595	T	G	0.469335	chr4_10114931_10157431	2.33e-23	PUBMEDID:19503597	Serum uric acid
piRNA	rs4697937	chr4	10149669	G	T	0.530665	chr4_10114931_10157431	6.03e-11	PUBMEDID:19503597	Serum uric acid
piRNA	rs4697940	chr4	10152329	G	C	0.488046	chr4_10114931_10157431	1.08e-08	PUBMEDID:19503597	Serum uric acid
piRNA	rs6449286	chr4	10126699	T	A	0.371102	chr4_10114931_10157431	6.98e-36	PUBMEDID:19503597	Serum uric acid
piRNA	rs6449289	chr4	10132543	C	T	0.27183	chr4_10114931_10157431	1.81e-45	PUBMEDID:19503597	Serum uric acid
piRNA	rs6813334	chr4	10148753	T	G	0.258316	chr4_10114931_10157431	4.3e-45	PUBMEDID:19503597	Serum uric acid
piRNA	rs6825888	chr4	10122734	T	C	0.25104	chr4_10114931_10157431	5.85e-38	PUBMEDID:19503597	Serum uric acid
piRNA	rs6827496	chr4	10151656	A	G	0.263514	chr4_10114931_10157431	5.9e-46	PUBMEDID:19503597	Serum uric acid
piRNA	rs6827946	chr4	10151335	T	C	0.221933	chr4_10114931_10157431	6.07e-110	PUBMEDID:19503597	Serum uric acid
piRNA	rs6840883	chr4	10150864	G	A	0.469335	chr4_10114931_10157431	2.02e-08	PUBMEDID:19503597	Serum uric acid
piRNA	rs6847379	chr4	10151704	G	T	0.468815	chr4_10114931_10157431	8.25e-09	PUBMEDID:19503597	Serum uric acid
piRNA	rs6850516	chr4	10139978	C	G	0.528586	chr4_10114931_10157431	2.94e-10	PUBMEDID:19503597	Serum uric acid
piRNA	rs6851524	chr4	10155041	C	A	0.197505	chr4_10114931_10157431	4.6e-08	PUBMEDID:19503597	Serum uric acid
piRNA	rs6855657	chr4	10148148	T	C	0.469854	chr4_10114931_10157431	2.53e-09	PUBMEDID:19503597	Serum uric acid
piRNA	rs715260	chr4	10128146	C	G	0.279626	chr4_10114931_10157431	8.9e-40	PUBMEDID:19503597	Serum uric acid
piRNA	rs731069	chr4	10152431	C	A	0.511435	chr4_10114931_10157431	3.15e-08	PUBMEDID:19503597	Serum uric acid
piRNA	rs731070	chr4	10152582	C	T	0.488046	chr4_10114931_10157431	3.6e-08	PUBMEDID:19503597	Serum uric acid
piRNA	rs7364180	chr22	42218856	G	A	0.735447	chr22_42218500_42230100	1e-06	PUBMEDID:21123754	Alzheimer`s disease biomarkers
piRNA	rs747356	chr4	10153051	T	G	0.511954	chr4_10114931_10157431	1.29e-08	PUBMEDID:19503597	Serum uric acid
piRNA	rs7667775	chr4	10128536	C	T	0.279106	chr4_10114931_10157431	5.68e-38	PUBMEDID:19503597	Serum uric acid
piRNA	rs7699512	chr4	10125808	C	T	0.474532	chr4_10114931_10157431	5.23e-48	PUBMEDID:19503597	Serum uric acid
piRNA	rs7699671	chr4	10125874	C	T	0.400728	chr4_10114931_10157431	3.38e-53	PUBMEDID:19503597	Serum uric acid
piRNA	rs873984	chr4	10137125	C	G	0.463617	chr4_10114931_10157431	3.97e-12	PUBMEDID:19503597	Serum uric acid
piRNA	rs881641	chr4	10133747	G	A	0.264033	chr4_10114931_10157431	4.49e-44	PUBMEDID:19503597	Serum uric acid
piRNA	rs881642	chr4	10133873	C	T	0.274428	chr4_10114931_10157431	1.25e-43	PUBMEDID:19503597	Serum uric acid
piRNA	rs881643	chr4	10134117	G	A	0.284823	chr4_10114931_10157431	3.68e-43	PUBMEDID:19503597	Serum uric acid
